# Supplementary material for: Synthesis of a versatile 1H-indene-3-carboxylate scaffold enabled by visible-light promoted Wolff rearrangement of 1-diazonaphthalen-2(1H)-ones
Source: Royal Society of Chemistry journal article supplement (doi:10.1039/d3cc01093g), 2023-01-01

## Supporting Information

### **Synthesis of a Versatile 1*H*-indene-3-carboxylate Scaffold Enabled by Visible-Light Promoted Wolff Rearrangement of 1-Diazonaphthalen-2(1*H*)-ones**

Xin Yue<sup>a‡</sup>, Ying Zhou<sup>a‡</sup>, Yan Zhang<sup>a</sup>, Tengfei Meng<sup>a</sup>, Yupei Zhao<sup>\*a</sup> and Wengang Guo<sup>\*a</sup>

*<sup>a</sup>Advanced Catalysis and Green Manufacturing Collaborative Innovation Center, School of Petrochemical Engineering, Changzhou University, Changzhou, 21364, China. Email: wgguo@cczu.edu.cn; zhaoyupei@cczu.edu.cn*

*<sup>‡</sup>These authors contributed equally to this work*

## Table of Contents

|                  |                                                                                           |    |
|------------------|-------------------------------------------------------------------------------------------|----|
| I.               | General Information.....                                                                  | 2  |
| II.              | Synthesis of 1-Diazonaphthalen-2(1 <i>H</i> )-ones .....                                  | 3  |
| III.             | Visible-Light-Promoted Sequential Reaction of 1-Diazonaphthalen-2(1 <i>H</i> )-ones ..... | 3  |
| IV.              | Unsuccessful Nucleophiles .....                                                           | 17 |
| V.               | The Procedure for Synthetic Transformation .....                                          | 17 |
| NMR Spectra..... |                                                                                           | 22 |

## I. General Information

Flash column chromatography was performed over silica gel (200-300 mesh) purchased from Qindao Puke Co., China. All air or moisture sensitive reactions were conducted in oven-dried glassware under nitrogen atmosphere using anhydrous solvents. Anhydrous acetonitrile was purified by the Innovative® solvent purification system or purchased from Energy Chemical. Analytical grade dichloromethane (DCM), 1,2-dichloroethane (DCE), tetrahydrofuran (THF), toluene, ethyl acetate, and cyclohexane were purchased from Energy Chemical. These solvents were directly used as received.  $\beta$ -naphthols, and 15-crown-5 were purchased from Energy Chemical and Leyan. Blue LED reactor was purchased from Shenzhen synled Tech. Co. Ltd.  $^1\text{H}$ , and  $^{13}\text{C}$  spectra were collected on a Bruker AV 300 and 400 MHz NMR spectrometer using residue solvent peaks as an internal standard ( $^1\text{H}$  NMR:  $\text{CDCl}_3$  at 7.26 ppm;  $^{13}\text{C}$  NMR:  $\text{CDCl}_3$  at 77.0 ppm). Mass spectra were collected on an Agilent GC/MS 5975C system, a MALDI Micro MX mass spectrometer, or an API QSTAR XL System.

## II. Synthesis of 1-Diazonaphthalen-2(1*H*)-ones

All the phthalazine 1-Diazonaphthalen-2(1*H*)-ones used this work are known compounds and were synthesized according to the literature procedure.<sup>1</sup>

## III. Visible-Light-Promoted Sequential Reaction of 1-Diazonaphthalen-2(1*H*)-ones

### General Procedure A.

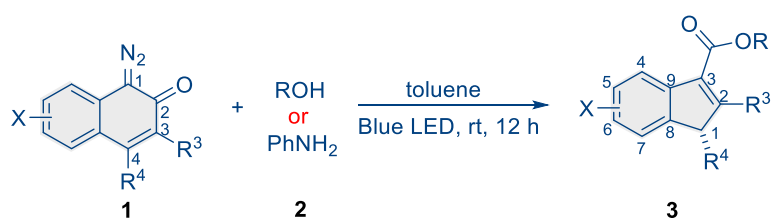

An oven-dried 4-mL vial equipped with a magnetic stirring bar was charged with the 1-diazonaphthalen-2(1*H*)-one **1** (0.1 mmol, 1.0 equiv), the alcohol **2** or aniline, and toluene (1.0 mL). The mixture was stirred at RT under the irradiation of 24 W blue LED for 12 h, and the reaction progress was monitored by TLC. Upon completion (12 h), the mixture was directly subjected to flash column chromatography on silica gel (eluent: hexanes/EtOAc = 10:1) to give the desired product **3**.

**Note:** For **3a–3e**, 20 equiv of alcohol was used; For **3f–3h** and **3j–3k**, 5 equiv of alcohol was used; For **3i**, 10 equiv of alcohol was used; For **3y**, 3.0 equiv of aniline was used; For **3z**, 3.0 equiv of phenol was used in anhydrous toluene.

<sup>1</sup> A. Biswas, S. Pan and R. Samanta, *Org. Lett.*, 2022, **24**, 1631–1636.

The images of the photo-reactor in current study:

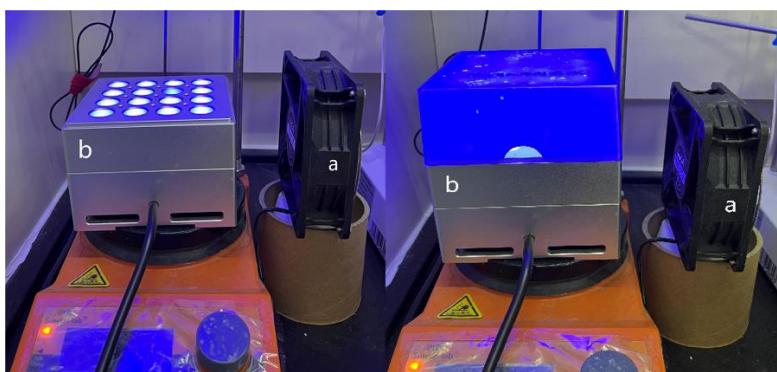

**a:** An additional fan was adopted to help cool the reaction mixture.

**b:** The photo reactor with a built-in fan (24 W output power with a peak power at 467.5 nm; beam angle: 45°; lumen: 130–140).

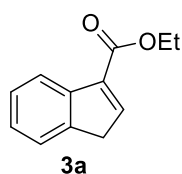

**Ethyl 1H-indene-3-carboxylate (3a)** was prepared as a light-yellow oil according to the General Procedure (eluent: hexanes/EtOAc = 10:1, 15.2 mg, 81% yield).

**<sup>1</sup>H NMR** (300 MHz, CDCl<sub>3</sub>) δ 7.97 (d, *J* = 7.6 Hz, 1H), 7.42 – 7.40 (m, 2H), 7.29 (t, *J* = 7.6 Hz, 1H), 7.22 – 7.17 (m, 1H), 4.31 (q, *J* = 7.1 Hz, 2H), 3.45 (d, *J* = 1.7 Hz, 2H), 1.34 (t, *J* = 7.1 Hz, 3H) ppm.

**<sup>13</sup>C NMR** (75 MHz, CDCl<sub>3</sub>) δ 164.2, 144.4, 143.4, 140.8, 136.5, 126.7, 125.5, 123.8, 122.5, 60.5, 38.4, 14.4 ppm.

It's a known compound.<sup>2</sup>

---

<sup>2</sup> V. V. Kozhukhova, S. A. Kalyuzhnaya, Y. G. Yatluk and A. L. Suvorov, *Russ. J. Org. Chem.*, 2004, **40**, 773–774.

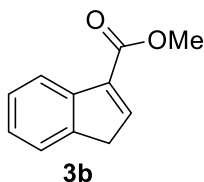

**Methyl 1*H*-indene-3-carboxylate (3b)** was prepared as a light-yellow oil according to the General Procedure (eluent: hexanes/EtOAc = 10:1, 12.2 mg, 70% yield).

**<sup>1</sup>H NMR** (300 MHz, CDCl<sub>3</sub>) δ 7.97 (d, *J* = 7.6 Hz, 1H), 7.42 – 7.39 (m, 2H), 7.31 – 7.17 (m, 2H), 3.84 (s, 3H), 3.46 (d, *J* = 1.9 Hz, 2H) ppm.

**<sup>13</sup>C NMR** (75 MHz, CDCl<sub>3</sub>) δ 164.6, 144.6, 143.4, 140.7, 136.1, 126.7, 125.6, 123.8, 122.4, 51.6, 38.5 ppm.

It's a known compound.<sup>3</sup>

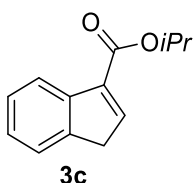

**Isopropyl 1*H*-indene-3-carboxylate (3c)** was prepared as a light-yellow oil according to the General Procedure 1 (eluent: hexanes/EtOAc = 10:1, 12.7 mg, 63% yield).

**<sup>1</sup>H NMR** (300 MHz, CDCl<sub>3</sub>) δ 7.97 (d, *J* = 7.6 Hz, 1H), 7.42 – 7.37 (m, 2H), 7.28 (t, *J* = 7.6 Hz, 1H), 7.21 – 7.16 (m, 1H), 5.23 – 5.15 (m, 1H), 3.443 – 3.437 (m, 2H), 1.32 (d, *J* = 6.2 Hz, 6H) ppm.

**<sup>13</sup>C NMR** (75 MHz, CDCl<sub>3</sub>) δ 163.8, 144.2, 143.5, 140.9, 136.9, 126.6, 125.5, 123.8, 122.5, 67.9, 38.3, 22.0 ppm.

**HRMS** (ESI+) Calcd for C<sub>13</sub>H<sub>15</sub>O<sub>2</sub> [M+H]<sup>+</sup>: 203.1072, found: 203.1076.

---

<sup>3</sup> I. Honzíčková, J. Vinklárek, C. C. Romão, Z. Růžicková and Jan Honzíček, *New J. Chem.*, 2016, **40**, 245–256.

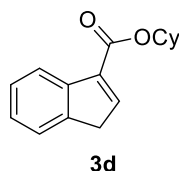

**Cyclohexyl 1*H*-indene-3-carboxylate (3d)** was prepared as a red oil according to the General Procedure (eluent: hexanes/EtOAc = 10:1, 17.4 mg, 72% yield).

**<sup>1</sup>H NMR** (300 MHz, CDCl<sub>3</sub>) δ 7.97 (d, *J* = 7.6 Hz, 1H), 7.40 – 7.18 (m, 4H), 4.98 – 4.95 (m, 1H), 3.443 – 3.438 (m, 2H), 1.92 – 1.35 (m, 10H) ppm.

**<sup>13</sup>C NMR** (75 MHz, CDCl<sub>3</sub>) δ 163.7, 144.2, 143.5, 140.9, 137.0, 126.6, 125.5, 123.8, 122.5, 72.8, 38.3, 31.7, 25.5, 23.8 ppm.

**HRMS** (ESI+) Calcd for C<sub>16</sub>H<sub>19</sub>O<sub>2</sub> [M+H]<sup>+</sup>: 243.1385, found: 243.1393.

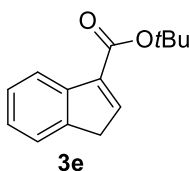

**Tert-butyl 1*H*-indene-3-carboxylate (3e)** was prepared as a light-yellow oil according to the General Procedure (eluent: hexanes/EtOAc = 10:1, 9.5 mg, 44% yield).

**<sup>1</sup>H NMR** (300 MHz, CDCl<sub>3</sub>) δ 7.94 (d, *J* = 7.6 Hz, 1H), 7.39 (d, *J* = 7.4 Hz, 1H), 7.33 – 7.25 (m, 2H), 7.20 – 7.15 (m, 1H), 3.42 (d, *J* = 1.8 Hz, 2H), 1.55 (s, 9H) ppm.

**<sup>13</sup>C NMR** (75 MHz, CDCl<sub>3</sub>) δ 163.6, 143.8, 143.6, 141.0, 137.9, 126.6, 125.4, 123.8, 122.5, 81.0, 38.1, 28.3 ppm.

**HRMS** (ESI+) Calcd for C<sub>14</sub>H<sub>17</sub>O<sub>2</sub> [M+H]<sup>+</sup>: 217.1229, found: 217.1230.

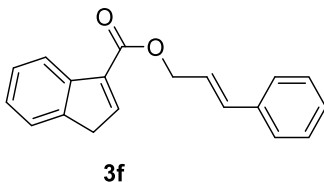

**Cinnamyl 1*H*-indene-3-carboxylate (3f)** was prepared as a light-yellow oil according to the General Procedure (eluent: hexanes/EtOAc = 10:1, 17.8 mg, 65% yield).

**<sup>1</sup>H NMR** (300 MHz, CDCl<sub>3</sub>) δ 8.08 (d, *J* = 7.6 Hz, 1H), 7.51 – 7.46 (m, 2H), 7.43 – 7.38

(m, 2H), 7.36 – 7.22 (m, 5H), 6.74 (d,  $J$  = 16 Hz, 1H), 6.46 – 6.36 (m, 1H), 4.98 – 4.96 (m, 2H), 3.52 (s, 2H) ppm.

$^{13}\text{C}$  NMR (75 MHz,  $\text{CDCl}_3$ )  $\delta$  163.9, 144.9, 143.4, 140.7, 136.3, 136.2, 134.3, 128.7, 128.2, 126.74, 126.72, 125.7, 123.9, 123.3, 122.5, 65.2, 38.5 ppm.

HRMS (ESI+) Calcd for  $\text{C}_{19}\text{H}_{17}\text{O}_2$   $[\text{M}+\text{H}]^+$ : 277.1229, found: 277.1226.

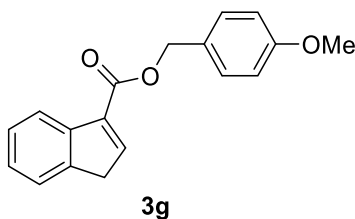

**4-Methoxybenzyl 1H-indene-3-carboxylate (3g)** was prepared as a pink solid according to the General Procedure (eluent: hexanes/EtOAc = 10:1, 17.3 mg, 62% yield).

$^1\text{H}$  NMR (300 MHz,  $\text{CDCl}_3$ )  $\delta$  7.96 (d,  $J$  = 7.6 Hz, 1H), 7.42 – 7.18 (m, 6H), 6.86 – 6.83 (m, 2H), 5.22 (s, 2H), 3.74 (s, 3H), 3.43 (d,  $J$  = 1.7 Hz, 2H) ppm.

$^{13}\text{C}$  NMR (75 MHz,  $\text{CDCl}_3$ )  $\delta$  164.0, 159.6, 144.8, 143.4, 140.7, 136.2, 130.1, 128.2, 126.7, 125.6, 123.8, 122.5, 114.0, 66.0, 55.3, 38.4 ppm.

HRMS (ESI+) Calcd for  $\text{C}_{18}\text{H}_{17}\text{O}_3$   $[\text{M}+\text{H}]^+$ : 281.1178, found: 281.1183.

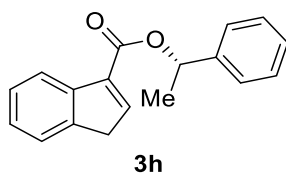

**(S)-1-Phenylethyl 1H-indene-3-carboxylate (3h)** was prepared as a light-yellow oil according to the General Procedure (eluent: hexanes/EtOAc = 10:1, 14.6 mg, 55% yield).

$^1\text{H}$  NMR (300 MHz,  $\text{CDCl}_3$ )  $\delta$  8.06 (d,  $J$  = 7.6 Hz, 1H), 7.51 – 7.44 (m, 4H), 7.39 – 7.23 (m, 5H), 6.14 (q,  $J$  = 6.5 Hz, 1H), 3.51 (s, 2H), 1.69 (d,  $J$  = 6.6 Hz, 3H) ppm.

$^{13}\text{C}$  NMR (75 MHz,  $\text{CDCl}_3$ )  $\delta$  163.4, 144.8, 143.5, 141.8, 140.8, 136.5, 128.6, 127.9, 126.7, 126.1, 125.6, 123.8, 122.5, 72.5, 38.4, 22.5 ppm.

HRMS (ESI+) Calcd for  $\text{C}_{18}\text{H}_{17}\text{O}_2$   $[\text{M}+\text{H}]^+$ : 265.1229, found: 265.1223.

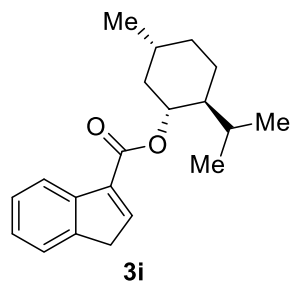

**(1*R*,2*S*,5*R*)-2-iso-propyl-5-methylcyclohexyl 1*H*-indene-3-carboxylate (3i)** was prepared as a light-yellow oil according to the General Procedure (eluent: hexanes/EtOAc = 10:1, 18.1 mg, 62% yield).

**<sup>1</sup>H NMR** (300 MHz, CDCl<sub>3</sub>) δ 7.97 (d, *J* = 7.3 Hz, 1H), 7.39 (s, 2H), 7.28 – 7.26 (m, 1H), 7.20 – 7.16 (m, 1H), 4.91 – 4.84 (m, 1H), 3.44 (s, 2H), 2.07 (d, *J* = 9.9 Hz, 1H), 1.93 – 1.92 (m, 1H), 1.68 – 1.64 (m, 2H), 1.52 – 1.49 (m, 3H), 1.11 – 1.04 (m, 2H), 0.87 – 0.85 (m, 6H), 0.75 – 0.71 (m, 3H) ppm.

**<sup>13</sup>C NMR** (75 MHz, CDCl<sub>3</sub>) δ 158.6, 139.0, 138.3, 135.8, 131.6, 121.4, 120.3, 118.6, 117.3, 69.1, 42.1, 35.9, 33.2, 29.1, 26.3, 21.3, 18.4, 16.9, 15.6, 11.3 ppm.

**HRMS** (ESI<sup>+</sup>) Calcd for C<sub>20</sub>H<sub>27</sub>O<sub>2</sub> [M+H]<sup>+</sup>: 299.2011, found: 299.2016.

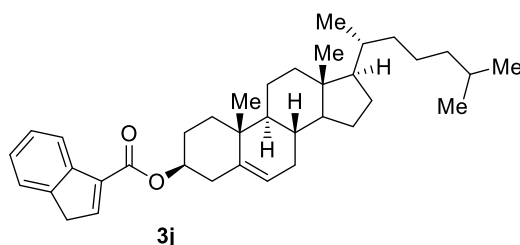

**(3*S*,8*S*,9*S*,10*R*,13*R*,17*R*)-10,13-dimethyl-17-((*R*)-6-methylheptan-2-yl)-2,3,4,7,8,9,10,11,12,13,14,15,16,17-tetradecahydro-1*H*-cyclopenta[*a*]phenanthren-3-yl 1*H*-indene-3-carboxylate (3j)** was prepared as a white solid according to the General Procedure (eluent: hexanes/EtOAc = 10:1, 30.6 mg, 58% yield).

**<sup>1</sup>H NMR** (300 MHz, CDCl<sub>3</sub>) δ 7.97 (d, *J* = 7.5 Hz, 1H), 7.41 – 7.39 (m, 2H), 7.31 – 7.26 (t, *J* = 7.17 Hz, 1H), 7.21 – 7.16 (m, 1H), 5.36 (d, *J* = 4.3 Hz, 1H), 4.85 – 4.74 (m, 1H), 3.44 (d, *J* = 1.4 Hz, 2H), 2.42 (d, *J* = 7.8 Hz, 2H), 1.97 – 1.93 (m, 2H), 1.90 – 1.86 (m, 1H), 1.80 – 1.73 (m, 1H), 1.71 – 1.66 (m, 1H), 1.52 – 1.43 (m, 7H), 1.29 – 1.26 (m, 3H), 1.21 – 1.18 (m, 3H), 1.16 – 1.05 (m, 5H), 1.01 (s, 4H), 0.85 (d, *J* = 6.5 Hz, 3H), 0.81 – 0.76 (m, 8H), 0.62



(s, 3H) ppm.

$^{13}\text{C}$  NMR (75 MHz,  $\text{CDCl}_3$ )  $\delta$  158.5, 139.1, 138.3, 135.7, 134.5, 131.6, 121.4, 120.3, 118.6, 117.6, 117.3, 69.0, 51.5, 50.9, 44.9, 37.1, 34.6, 34.3, 33.2, 33.1, 31.9, 31.5, 31.0, 30.6, 26.8, 26.7, 23.1, 22.8, 22.78, 19.1, 18.7, 17.7, 17.4, 15.9, 14.2, 13.5, 6.7 ppm.

HRMS (ESI+) Calcd for  $\text{C}_{37}\text{H}_{56}\text{NO}_2$   $[\text{M}+\text{NH}_4]^+$ : 546.4311, found: 546.4304.

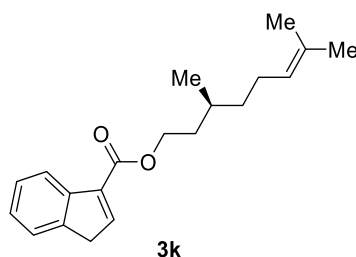

**(S)-3,7-dimethyloct-6-en-1-yl 1H-indene-3-carboxylate (3k)** was prepared as a light-yellow solid according to the General Procedure (eluent: hexanes/EtOAc = 10:1, 21.2 mg, 71% yield).

$^1\text{H}$  NMR (300 MHz,  $\text{CDCl}_3$ )  $\delta$  7.97 (d,  $J$  = 7.6 Hz, 1H), 7.42 – 7.38 (m, 2H), 7.28 (t,  $J$  = 7.6 Hz, 1H), 7.21 – 7.16 (m, 1H), 5.05 – 5.01 (m, 1H), 4.35 – 4.22 (m, 2H), 3.45 – 3.44 (m, 2H), 1.99 – 1.89 (m, 2H), 1.80 – 1.71 (m, 1H), 1.62 – 1.53 (m, 8H), 0.90 (d,  $J$  = 6.4 Hz, 3H), 0.80 – 0.76 (m, 2H) ppm.

$^{13}\text{C}$  NMR (75 MHz,  $\text{CDCl}_3$ )  $\delta$  159.1, 139.2, 138.2, 135.6, 131.3, 126.2, 121.5, 120.3, 119.4, 118.6, 117.3, 57.9, 33.2, 31.8, 30.4, 24.4, 20.5, 20.2, 14.3, 12.5 ppm.

HRMS (ESI+) Calcd for  $\text{C}_{20}\text{H}_{27}\text{O}_2$   $[\text{M}+\text{H}]^+$ : 299.2011, found: 299.2006.

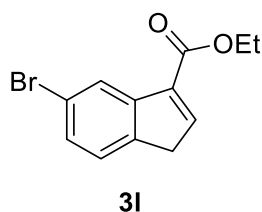

**Ethyl 5-bromo-1H-indene-3-carboxylate (3l)** was prepared as a light-yellow oil according to the General Procedure (eluent: hexanes/EtOAc = 10:1, 16.6 mg, 62% yield).

$^1\text{H}$  NMR (400 MHz,  $\text{CDCl}_3$ )  $\delta$  8.19 (d,  $J$  = 1.8 Hz, 1H), 7.47 (t,  $J$  = 1.8 Hz, 1H), 7.38 – 7.36 (m, 1H), 7.32 – 7.30 (m, 1H), 4.37 (q,  $J$  = 7.1 Hz, 2H), 3.47 (d,  $J$  = 1.4 Hz, 2H), 1.42 (t,  $J$  =

7.1 Hz, 3H) ppm.

$^{13}\text{C}$  NMR (100 MHz,  $\text{CDCl}_3$ )  $\delta$  163.7, 145.6, 142.8, 142.1, 135.7, 128.4, 125.7, 125.1, 120.6, 60.7, 38.2, 14.4 ppm.

HRMS (ESI+) Calcd for  $\text{C}_{12}\text{H}_{12}\text{BrO}_2$   $[\text{M}+\text{H}]^+$ : 267.0021, found: 267.0026.

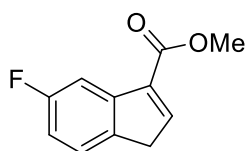

**3m**

**Methyl 5-fluoro-1H-indene-3-carboxylate (3m)** was prepared as a yellow solid according to the General Procedure A (eluent: hexanes/EtOAc = 10:1, 12.5 mg, 65% yield).

$^1\text{H}$  NMR (300 MHz,  $\text{CDCl}_3$ )  $\delta$  7.68 – 7.64 (m, 1H), 7.45 (s, 1H), 7.32 – 7.28 (m, 1H), 6.91 – 6.85 (m, 1H), 3.83 (s, 3H), 3.42 (s, 2H) ppm.

$^{13}\text{C}$  NMR (100 MHz,  $\text{CDCl}_3$ )  $\delta$  163.1, 161.3 (d,  $^1J_{\text{C-F}} = 240$  Hz), 145.5, 141.4 (d,  $^3J_{\text{C-F}} = 10$  Hz), 137.5 (d,  $^4J_{\text{C-F}} = 3$  Hz), 134.6 (d,  $^4J_{\text{C-F}} = 3$  Hz), 123.4 (d,  $^3J_{\text{C-F}} = 9$  Hz), 111.5 (d,  $^2J_{\text{C-F}} = 23$  Hz), 108.7 (d,  $^2J_{\text{C-F}} = 25$  Hz), 50.7, 36.9 ppm.

$^{19}\text{F}$  NMR (375 MHz,  $\text{CDCl}_3$ )  $\delta$  -116.4 ppm.

HRMS (ESI+) Calcd for  $\text{C}_{11}\text{H}_{10}\text{FO}_2$   $[\text{M}+\text{H}]^+$ : 193.0665, found: 193.0659.

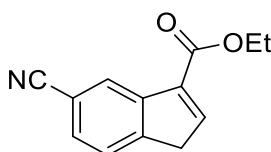

**3n**

**Ethyl 5-cyano-1H-indene-3-carboxylate (3n)** was prepared as a yellow solid according to the General Procedure A (eluent: hexanes/EtOAc = 10:1, 11 mg, 49% yield).

$^1\text{H}$  NMR (400 MHz,  $\text{CDCl}_3$ )  $\delta$  8.33 (s, 1H), 7.58 – 7.56 (m, 3H), 4.40 (q,  $J = 7.2$  Hz, 2H), 3.62 (d,  $J = 1.4$  Hz, 2H), 1.43 (t,  $J = 7.2$  Hz, 3H) ppm.

$^{13}\text{C}$  NMR (100 MHz,  $\text{CDCl}_3$ )  $\delta$  163.3, 148.2, 146.0, 141.6, 135.5, 129.5, 126.2, 124.5, 119.5, 110.7, 60.9, 38.9, 14.3 ppm.

**HRMS** (ESI+) Calcd for C<sub>13</sub>H<sub>12</sub>NO<sub>2</sub> [M+H]<sup>+</sup>: 214.0868, found: 214.0859.

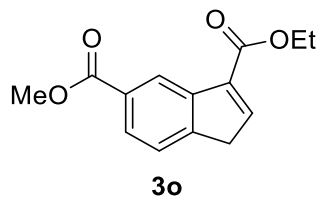

**3-Ethyl 5-methyl 1H-indene-3,5-dicarboxylate (3o)** was prepared as a white solid according to the General Procedure A (eluent: hexanes/EtOAc = 10:1, 13 mg, 53% yield).

**<sup>1</sup>H NMR** (300 MHz, CDCl<sub>3</sub>) δ 8.68 (s, 1H), 7.98 (d, *J* = 7.8 Hz, 1H), 7.53 – 7.50 (m, 2H), 4.40 (q, *J* = 7.1 Hz, 2H), 3.94 (s, 3H), 3.57 (s, 2H), 1.43 (t, *J* = 7.1 Hz, 3H) ppm.

**<sup>13</sup>C NMR** (75 MHz, CDCl<sub>3</sub>) δ 167.5, 163.8, 148.4, 145.0, 141.1, 136.1, 128.9, 127.2, 123.7, 123.6, 60.7, 52.1, 38.5, 14.3 ppm.

**HRMS** (ESI+) Calcd for C<sub>14</sub>H<sub>15</sub>O<sub>4</sub> [M+H]<sup>+</sup>: 247.0970, found: 247.0963.

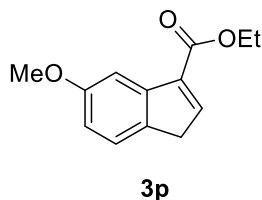

**Ethyl 5-methoxy-1H-indene-3-carboxylate (3p)** was prepared as a light-yellow solid according to the General Procedure (eluent: hexanes/EtOAc = 10:1, 18.2 mg, 83% yield).

**<sup>1</sup>H NMR** (300 MHz, CDCl<sub>3</sub>) δ 7.65 – 7.64 (m, 1H), 7.48 (s, 1H), 7.34 (d, *J* = 8.2 Hz, 1H), 6.84 – 6.81 (m, 1H), 4.38 (q, *J* = 7.1 Hz, 2H), 3.86 (s, 3H), 3.45 (s, 2H), 1.41 (t, *J* = 7.1 Hz, 3H) ppm.

**<sup>13</sup>C NMR** (75 MHz, CDCl<sub>3</sub>) δ 164.2, 159.0, 145.8, 142.2, 136.1, 135.5, 124.2, 112.4, 107.4, 60.5, 55.5, 37.8, 14.4 ppm.

**HRMS** (ESI+) Calcd for C<sub>13</sub>H<sub>15</sub>O<sub>3</sub> [M+H]<sup>+</sup>: 219.1021, found: 219.1012.

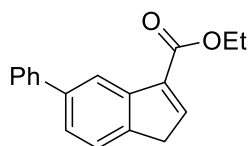

**3q**

**Ethyl 5-phenyl-1H-indene-3-carboxylate (3q)** was prepared as a colorless oil according to the General Procedure (eluent: hexanes/EtOAc = 10:1, 23.5 mg, 87% yield).

**<sup>1</sup>H NMR** (300 MHz, CDCl<sub>3</sub>) δ 8.31 (s, 1H), 7.68 – 7.65 (m, 2H), 7.55 – 7.50 (m, 3H), 7.49 – 7.42 (m, 2H), 7.37 – 7.32 (m, 1H), 4.39 (q, *J* = 7.1 Hz, 2H), 3.56 (d, *J* = 1.8 Hz, 2H), 1.42 (t, *J* = 7.1 Hz, 3H) ppm.

**<sup>13</sup>C NMR** (75 MHz, CDCl<sub>3</sub>) δ 164.2, 144.9, 142.5, 141.7, 141.5, 140.0, 136.4, 128.7, 127.4, 127.1, 124.8, 124.0, 121.3, 60.6, 38.2, 14.4 ppm.

**HRMS** (ESI+) Calcd for C<sub>18</sub>H<sub>17</sub>O<sub>2</sub> [M+H]<sup>+</sup>: 265.1229, found: 265.1221.

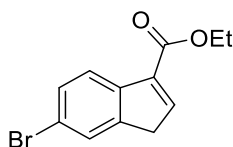

**3r**

**Ethyl 6-bromo-1H-indene-3-carboxylate (3r)** was prepared as a light-yellow oil according to the General Procedure (eluent: hexanes/EtOAc = 10:1, 21 mg, 79% yield).

**<sup>1</sup>H NMR** (300 MHz, CDCl<sub>3</sub>) δ 7.90 (d, *J* = 8.2 Hz, 1H), 7.60 (s, 1H), 7.49 – 7.43 (m, 2H), 4.37 (q, *J* = 7.1 Hz, 2H), 3.50 (s, 2H), 1.40 (t, *J* = 7.1 Hz, 3H) ppm.

**<sup>13</sup>C NMR** (75 MHz, CDCl<sub>3</sub>) δ 163.8, 145.4, 144.4, 139.8, 135.9, 129.8, 127.1, 123.8, 119.9, 60.7, 38.2, 14.4 ppm.

**HRMS** (ESI+) Calcd for C<sub>12</sub>H<sub>12</sub>BrO<sub>2</sub> [M+H]<sup>+</sup>: 267.0021, found: 269.0007.

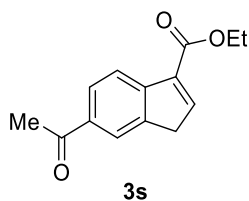

**Ethyl 6-acetyl-1H-indene-3-carboxylate (3s)** was prepared as a white solid according to the General Procedure A (eluent: hexanes/EtOAc = 10:1, 21 mg, 69% yield).

<sup>1</sup>H NMR (300 MHz, CDCl<sub>3</sub>) δ 8.12 – 8.07 (m, 2H), 7.97 (d, *J* = 8.1 Hz, 1H), 7.63 (s, 1H), 4.39 (q, *J* = 7.1 Hz, 2H), 3.59 (s, 2H), 2.64 (s, 3H), 1.42 (t, *J* = 7.1 Hz, 3H) ppm.

<sup>13</sup>C NMR (75 MHz, CDCl<sub>3</sub>) δ 198.2, 163.7, 147.8, 145.5, 143.5, 136.2, 134.6, 127.7, 123.4, 122.3, 60.7, 38.6, 26.8, 14.3 ppm.

HRMS (ESI+) Calcd for C<sub>14</sub>H<sub>15</sub>O<sub>3</sub> [M+H]<sup>+</sup>: 231.1021, found: 231.1014.

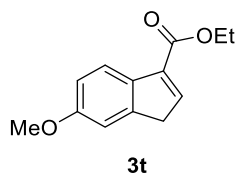

**Ethyl 6-methoxy-1H-indene-3-carboxylate (3t)** was prepared as a white solid according to the General Procedure (eluent: hexanes/EtOAc = 10:1, 16.5 mg, 75% yield).

<sup>1</sup>H NMR (300 MHz, CDCl<sub>3</sub>) δ 7.92 (d, *J* = 8.5 Hz, 1H), 7.32 (t, *J* = 2.0 Hz, 1H), 7.05 (s, 1H), 6.93 – 6.89 (m, 1H), 4.36 (q, *J* = 7.1 Hz, 2H), 3.84 (s, 3H), 3.48 (d, *J* = 1.3 Hz, 2H), 1.40 (t, *J* = 7.1 Hz, 3H) ppm.

<sup>13</sup>C NMR (75 MHz, CDCl<sub>3</sub>) δ 164.3, 158.4, 145.3, 142.1, 136.1, 133.9, 122.9, 112.3, 110.1, 60.4, 55.5, 38.3, 14.4 ppm.

HRMS (ESI+) Calcd for C<sub>13</sub>H<sub>15</sub>O<sub>3</sub> [M+H]<sup>+</sup>: 219.1021, found: 219.1014.

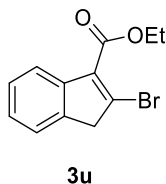

**Ethyl 2-bromo-1H-indene-3-carboxylate (3u)** was prepared as a white solid according to the General Procedure A (eluent: hexanes/EtOAc = 10:1, 15 mg, 56% yield).

<sup>1</sup>H NMR (300 MHz, CD<sub>2</sub>Cl<sub>2</sub>) δ 7.77 (d, *J* = 7.4 Hz, 1H), 7.31 (d, *J* = 7.3 Hz, 1H), 7.25 – 7.13 (m, 2H), 4.32 (q, *J* = 7.1 Hz, 2H), 3.70 (s, 2H), 1.35 (t, *J* = 7.1 Hz, 3H) ppm.

<sup>13</sup>C NMR (75 MHz, CD<sub>2</sub>Cl<sub>2</sub>) δ 163.0, 141.5, 140.9, 133.8, 133.5, 126.9, 125.6, 123.2, 121.8, 60.9, 47.3, 14.1 ppm.

It's a known compound and not very stable.<sup>4</sup>

### General Procedure B.

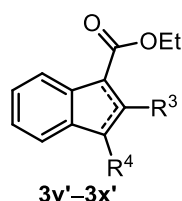

**Note:** In initial synthesis, 3v'-3x' were obtained as a mixture of isomers, thus the ester groups in the corresponding products was reduced by DIBAL-H to get cleaner NMR spectra.

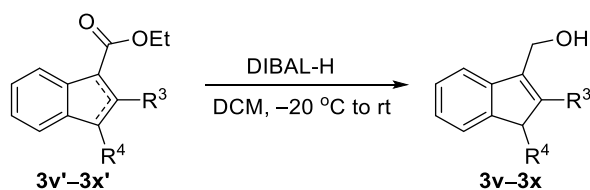

To a solution of 3v'-3x' (0.2 mmol) in anhydrous DCM (2.0 mL), DIBAL-H (for 3v'-3x': 2.0 equiv, for 3x': 4.0 equiv, 1.0 M in *n*-hexane) was added dropwise under a nitrogen atmosphere at -20 °C and then the resulting reaction mixture was slowly warmed to room temperature and stirred for additional 2 h at the same temperature. After completion, the reaction was quenched with HCl (1M) solution at 0 °C and the mixture was extracted with DCM (3 × 30 mL). The combined organic phases were washed with brine, dried over Na<sub>2</sub>SO<sub>4</sub>, and concentrated in vacuo, the mixture was directly subjected to flash column chromatography on silica gel (eluent: hexanes/ethyl acetate = 5:1) to give the desired product 3v-3x.

---

<sup>4</sup> C. Yu, X. Ma, B. Chen, B. Tang, R. S. Paton and G. Zhang, *Eur. J. Org. Chem.*, 2017, **11**, 1561–1565.

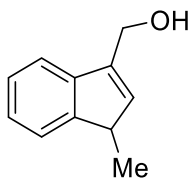

**3v**

**(1-Methyl-1H-inden-3-yl) methanol (3v)** was prepared as a light-yellow oil according to the General Procedure B (eluent: hexanes/EtOAc = 5:1, 17.6 mg, 46% yield).

**For the major isomer:**

**<sup>1</sup>H NMR** (400 MHz, CDCl<sub>3</sub>) δ 7.39 (d, *J* = 7.3 Hz, 1H), 7.24 – 7.21 (m, 2H), 7.15 – 7.12 (m, 1H), 6.11 (s, 1H), 3.81 – 3.77 (m, 1H), 3.72 – 3.68 (m, 1H), 3.53 – 3.50 (m, 1H), 2.08 – 2.07 (s, 3H), 1.71 (s, 1H) ppm.

**<sup>13</sup>C NMR** (100 MHz, CDCl<sub>3</sub>) δ 146.2, 145.0, 141.1, 130.7, 127.0, 125.0, 123.2, 119.2, 63.9, 51.9, 13.1, ppm.

**HRMS** (ESI+) Calcd for C<sub>11</sub>H<sub>13</sub>O [M+H]<sup>+</sup>: 161.0966, found: 161.0965.

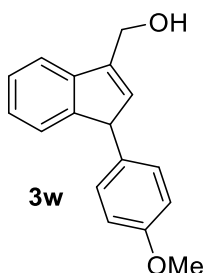

**3w**

**(1-(4-Methoxyphenyl)-1H-inden-3-yl) methanol (3w)** was prepared as a yellow solid according to the General Procedure B (eluent: hexanes/EtOAc = 5:1, 45 mg, 89% yield).

**<sup>1</sup>H NMR** (400 MHz, CDCl<sub>3</sub>) δ 7.57 – 7.53 (m, 4H), 7.32 (t, *J* = 7.4 Hz, 1H), 7.25 (t, *J* = 7.4 Hz, 1H), 6.98 (d, *J* = 8.7 Hz, 2H), 6.51 (d, *J* = 1.96 Hz, 1H), 3.98 – 3.97 (m, 1H), 3.89 – 3.86 (m, 1H), 3.84 (s, 3H), 3.77 – 3.74 (m, 1H), 1.75 (s, 1H) ppm.

**<sup>13</sup>C NMR** (100 MHz, CDCl<sub>3</sub>) δ 159.4, 145.5, 145.3, 144.2, 131.6, 128.9, 128.2, 127.1, 125.3, 123.7, 120.7, 114.1, 64.1, 55.4, 52.2 ppm.

**HRMS** (ESI+) Calcd for C<sub>17</sub>H<sub>17</sub>O<sub>2</sub> [M+H]<sup>+</sup>: 253.1229, found: 253.1227.

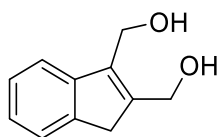

**3x**

**(1*H*-Indene-2,3-diyl) dimethanol (3x)** was prepared as a yellow solid according to the General Procedure B (eluent: hexanes/EtOAc = 5:1, 11.1 mg, 32% yield).

**<sup>1</sup>H NMR** (400 MHz, CDCl<sub>3</sub>) δ 7.23 – 7.13 (m, 4H), 7.08 – 7.04 (m, 1H), 6.58 (s, 1H), 4.43 – 4.33 (m, 3H), 4.05 – 4.01 (m, 1H), 3.50 – 3.46 (m, 1H), 3.39 – 3.34 (m, 1H) ppm.

**<sup>13</sup>C NMR** (100 MHz, CDCl<sub>3</sub>) δ 150.0, 143.9, 143.7, 130.2, 127.3, 125.2, 123.2, 121.3, 63.7, 60.7, 53.9 ppm.

**HRMS** (ESI+) Calcd for C<sub>11</sub>H<sub>12</sub>NaO<sub>2</sub> [M+Na]<sup>+</sup>: 199.0735, found: 199.0732.

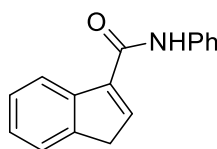

**3y**

**N-phenyl-1*H*-indene-3-carboxamide (3y)** was prepared as a white solid according to the General Procedure A (eluent: hexanes/EtOAc = 10:1, 39 mg, 83% yield).

**<sup>1</sup>H NMR** (400 MHz, DMSO) δ 10.21 (s, 1H), 7.95 (d, *J* = 8.72 Hz, 1H), 7.79 (d, *J* = 7.64 Hz, 2H), 7.54 (d, *J* = 7.32 Hz, 1H), 7.42 – 7.41 (m, 1H), 7.38 – 7.32 (m, 3H), 7.28 – 7.24 (m, 1H), 7.10 (t, *J* = 7.36 Hz, 1H), 3.63 (d, *J* = 1.16 Hz, 2H) ppm.

**<sup>13</sup>C NMR** (100 MHz, DMSO) δ 163.4, 143.9, 142.1, 139.5, 139.4, 139.0, 129.1, 126.7, 125.7, 124.4, 124.0, 122.4, 120.6, 38.6 ppm.

It's a known compound.<sup>3</sup>

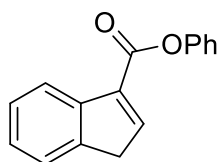

**3z**

**Phenyl 1*H*-indene-3-carboxylate (3z)** was prepared as a white solid according to the General Procedure A (eluent: hexanes/EtOAc = 10:1, 13 mg, 55% yield).



$^1\text{H}$  NMR (300 MHz,  $\text{CDCl}_3$ )  $\delta$  8.11 (d,  $J = 7.6$  Hz 1H), 7.69 (s, 1H), 7.51 (d,  $J = 7.6$  Hz, 1H), 7.46 – 7.35 (m, 3H), 7.32 – 7.21 (m, 4H), 3.61 (s, 2H) ppm.

$^{13}\text{C}$  NMR (75 MHz,  $\text{CDCl}_3$ )  $\delta$  162.3, 150.6, 146.3, 143.3, 140.5, 135.7, 129.6, 126.9, 126.0, 125.9, 123.9, 122.5, 121.8, 38.8 ppm.

HRMS (ESI+) Calcd for  $\text{C}_{16}\text{H}_{13}\text{O}_2$   $[\text{M}+\text{H}]^+$ : 237.0916, found: 237.0907.

#### IV. Unsuccessful Nucleophiles

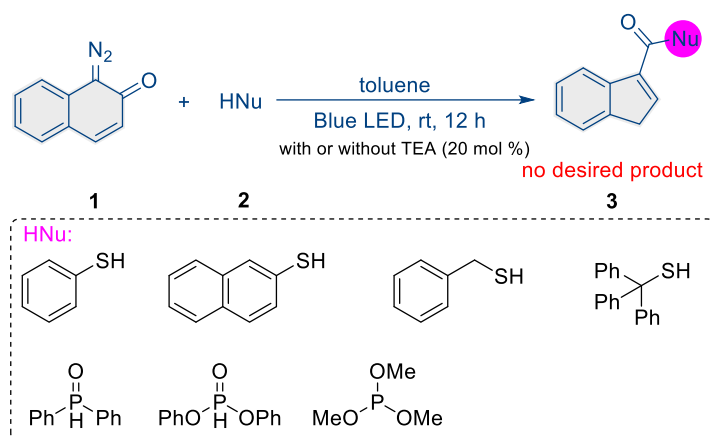

#### V. The Procedure for Synthetic Transformation

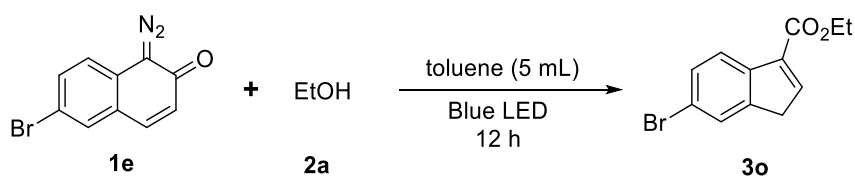

An oven-dried test tube equipped with a magnetic stirring bar was charged with the **1e** (4.42 mmol, 1.1 g), **2a** (20 equiv, 5.2 mL), and toluene (5 mL). The mixture was stirred at 25 °C under the irradiation of Blue LED for 12 h, and the reaction progress was monitored by TLC. Upon completion (12 h), the mixture was directly subjected to flash column chromatography on silica gel (eluent: hexanes/ethyl acetate = 10:1) to give the desired product **3o**.

#### General Procedure C.

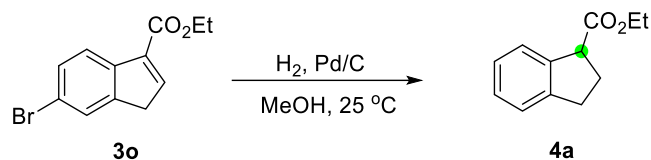

In a nitrogen atmosphere of glovebox, an oven-dried test tube equipped with a magnetic stirring bar was charged with **3o** (0.2 mmol, 54 mg), Pd/C (5%, 10 mg, 10 % on carbon), and anhydrous MeOH (2.0 mL). Then, the reaction mixture was removed from glovebox and then attached with a H<sub>2</sub> balloon. The resulting suspension was stirred at room temperature for 4 h. Upon completion (monitored by TLC), the reaction mixture was filtered through a short plug of celite, and the filter cake was washed with DMC (10 mL). The combined filtrates were concentrated under reduced pressure to get the crude product. The desired product **4a** was obtained after purification on silica gel flash column chromatography (eluent: hexanes/ethyl acetate = 10:1).

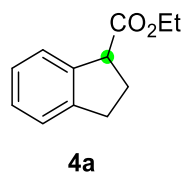

Ethyl 2,3-dihydro-1*H*-indene-1-carboxylate (**4a**, **racemic**) was prepared as a colorless oil according to the General Procedure C (eluent: hexanes/EtOAc = 10:1, 34 mg, 89% yield).

**<sup>1</sup>H NMR** (400 MHz, CDCl<sub>3</sub>) δ 7.39 – 7.37 (m, 1H), 7.25 – 7.15 (m, 3H), 4.22 – 4.16 (m, 2H), 4.04 (t, *J* = 7.2 Hz, 1H), 3.14 – 3.06 (m, 1H), 2.95 – 2.87 (m, 1H), 2.49 – 2.28 (m, 2H), 1.28 (t, *J* = 7.1 Hz, 3H) ppm.

**<sup>13</sup>C NMR** (100 MHz, CDCl<sub>3</sub>) δ 173.9, 144.1, 140.9, 127.5, 126.4, 124.7, 124.69, 60.8, 50.2, 31.8, 28.7, 14.3 ppm.

**HRMS** (ESI+) Calcd for C<sub>12</sub>H<sub>15</sub>O<sub>2</sub> [M+H]<sup>+</sup>: 191.1072, found: 191.1068.

## General Procedure D

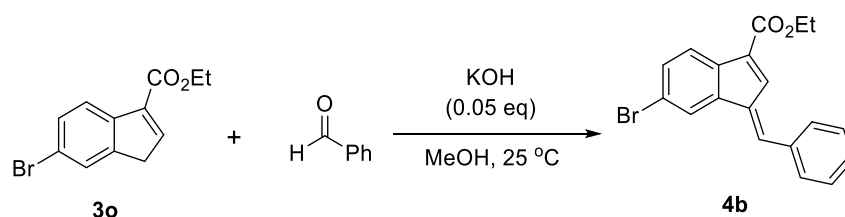

The aldehyde (1.1 equiv) was added to a solution of **3o** (0.2 mmol, 54 mg, 1.0 equiv) in MeOH (2.0 mL). Under vigorously stirring, KOH (0.01 mmol, 0.6 mg, 5 mol %) was added to the resulted solution. The reaction was smoothly proceeded, and the yellow product **4b** was precipitated immediately under the bottom of the vial. Upon completion (10 min, monitored by TLC), the mixture was directly subjected to flash column chromatography on silica gel (eluent: hexanes/ethyl acetate = 10:1) to give the desired product **4b**.

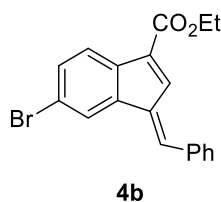

**Ethyl (E)-1-benzylidene-6-bromo-1H-indene-3-carboxylate (4b)** was prepared as a yellow solid according to the General Procedure D (eluent: hexanes/EtOAc = 10:1, 47.6 mg, 65% yield, *E/Z* >100:1 by crude  $^1\text{H}$  NMR).

$^1\text{H}$  NMR (300 MHz,  $\text{CDCl}_3$ )  $\delta$  7.84 – 7.89 (m, 2H), 7.73 (s, 1H), 7.67 (s, 1H), 7.62 (d, *J* = 7.2 Hz, 2H), 7.49 – 7.42 (m, 4H), 4.38 (q, *J* = 7.1 Hz, 2H), 1.41 (t, *J* = 7.1 Hz, 3H) ppm.

$^{13}\text{C}$  NMR (75 MHz,  $\text{CDCl}_3$ )  $\delta$  164.5, 139.3, 137.2, 136.9, 135.9, 135.8, 135.6, 133.6, 130.7, 130.6, 129.9, 129.1, 123.7, 122.5, 120.1, 60.8, 14.4 ppm.

HRMS (ESI+) Calcd for  $\text{C}_{11}\text{H}_{13}\text{O}_2$  [ $\text{M}+\text{H}$ ] $^+$ : 355.0334, found: 355.0325.

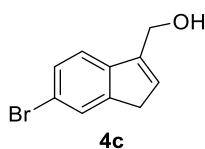

**(6-Bromo-1H-inden-3-yl) methanol (4c)** was prepared as a yellow solid according to the General Procedure B (eluent: hexanes/EtOAc = 5:1, 55 mg, 49% yield).

<sup>1</sup>H NMR (400 MHz, CDCl<sub>3</sub>) δ 7.57 (s, 1H), 7.42 – 7.39 (m, 1H), 7.26 (d, *J* = 8.0 Hz, 1H), 6.42 (s, 1H), 4.65 (d, *J* = 1.4 Hz, 2H), 3.33 (d, *J* = 1.3 Hz, 2H), 1.93 (s, 1H) ppm.

<sup>13</sup>C NMR (100 MHz, CDCl<sub>3</sub>) δ 146.6, 143.5, 142.3, 129.9, 129.3, 127.2, 120.7, 119.2, 59.6, 37.7 ppm.

HRMS (ESI+) Calcd for C<sub>10</sub>H<sub>10</sub>BrO [M+H]<sup>+</sup>: 224.9915, found: 226.9897.

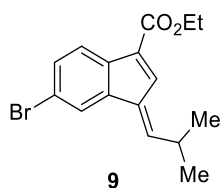

**Ethyl (E)-6-bromo-1-(2-methylpropylidene)-1H-indene-3-carboxylate (9)** was prepared as a yellow oil according to the General Procedure D (eluent: hexanes/EtOAc = 10:1, 45 mg, 70% yield, *E/Z* = 5:1 based on the crude <sup>1</sup>H NMR).

<sup>1</sup>H NMR (400 MHz, CDCl<sub>3</sub>) δ 7.82 (d, *J* = 8.2 Hz, 1H), 7.71 (d, *J* = 1.7 Hz, 1H), 7.58 (s, 1H), 7.43 – 7.41 (m, 1H), 6.73 (d, *J* = 10.2 Hz, 1H), 4.40 – 4.35 (m, 2H), 3.16 – 3.11 (m, 1H), 1.41 (t, *J* = 7.12 Hz, 3H), 1.19 (d, *J* = 6.64 Hz, 6H) ppm.

<sup>13</sup>C NMR (100 MHz, CDCl<sub>3</sub>) δ 164.5, 147.5, 138.5, 137.7, 135.8, 133.5, 132.8, 130.2, 123.5, 122.4, 119.9, 60.7, 30.3, 23.0, 14.4 ppm.

HRMS (ESI+) Calcd for C<sub>16</sub>H<sub>18</sub>BrO<sub>2</sub> [M+H]<sup>+</sup>: 321.0490, found: 321.0485.

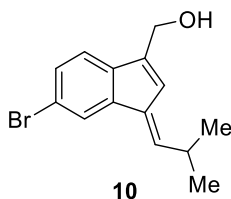

**(E)-6-bromo-1-(2-methylpropylidene)-1H-inden-3-ylmethanol (10)** was prepared as a yellow oil according to the General Procedure B (eluent: hexanes/EtOAc = 10:1, 130 mg, 81% yield).

<sup>1</sup>H NMR (400 MHz, CDCl<sub>3</sub>) δ 7.68 (d, *J* = 1.7 Hz, 1H), 7.36 – 7.33 (m, 1H), 7.16 (d, *J* = 8.0 Hz, 1H), 6.73 (s, 1H), 6.41 (d, *J* = 10.0 Hz, 1H), 4.72 (s, 2H), 3.06 – 2.97 (m, 1H), 1.91 (s, 1H), 1.15 (d, *J* = 6.6 Hz, 6H) ppm.

<sup>13</sup>C NMR (100 MHz, CDCl<sub>3</sub>) δ 146.7, 143.7, 140.6, 139.6, 136.2, 129.5, 122.5, 121.5, 120.3, 119.4, 59.7, 29.8, 23.2 ppm.

It's a known compound.<sup>5</sup>

---

<sup>5</sup> J. Jo, M. Jeong, J.-S. Ahn, J. Akter, H.-S. Kim, Y.-G. Suh and H. Yun, *J. Org. Chem.*, 2019, **84**, 10953–10961.

7.987  
7.962  
7.420  
7.403  
7.397  
7.311  
7.287  
7.262  
7.217  
7.214  
7.192  
7.188  
7.185  
7.167

4.343  
4.320  
4.296  
4.272  
3.455  
3.449

1.366  
1.342  
1.318

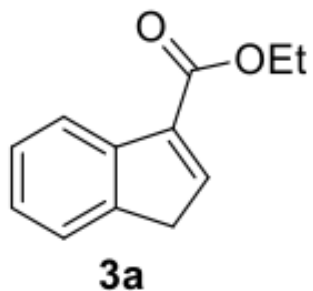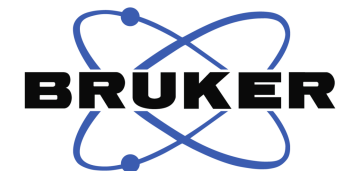

Current Data Parameters  
NAME HNMR-YX-1-p40 (B2)  
EXPNO 369  
PROCNO 1

F2 - Acquisition Parameters  
Date\_ 20220707  
Time 16.21  
INSTRUM spect  
PROBHD 5 mm PABBO BB-  
PULPROG zg30  
TD 65536  
SOLVENT CDCl3  
NS 16  
DS 2  
SWH 6009.615 Hz  
FIDRES 0.091699 Hz  
AQ 5.4525952 sec  
RG 203  
DW 83.200 usec  
DE 6.50 usec  
TE -59.1 K  
D1 1.00000000 sec  
TD0 1

===== CHANNEL f1 =====  
SFO1 300.1318534 MHz  
NUC1 1H  
P1 10.00 usec  
PLW1 14.00000000 W

F2 - Processing parameters  
SI 65536  
SF 300.1300297 MHz  
WDW EM  
SSB 0  
LB 0.30 Hz  
GB 0  
PC 1.00

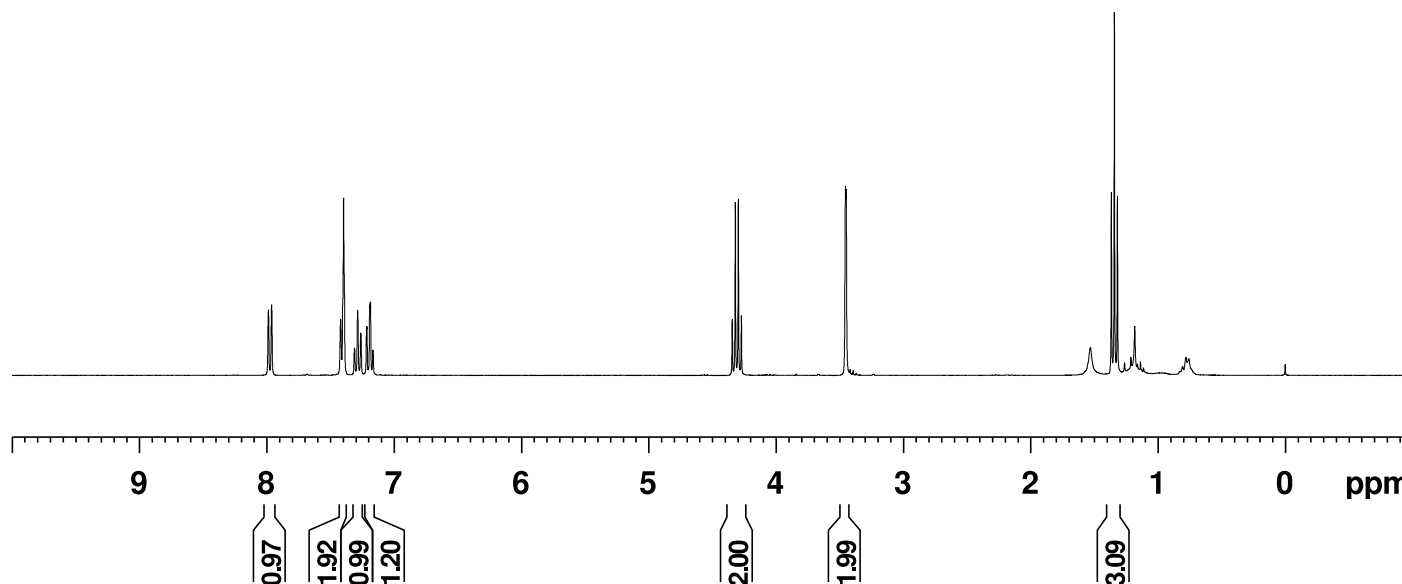

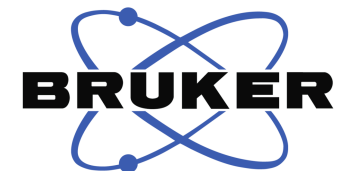

Current Data Parameters  
NAME CNMR-YX-1-p40 (B2)  
EXPNO 385  
PROCNO 1

F2 - Acquisition Parameters  
Date\_ 20220708  
Time 22.29  
INSTRUM spect  
PROBHD 5 mm PABBO BB-  
PULPROG zgpg30  
TD 65536  
SOLVENT CDCl3  
NS 600  
DS 4  
SWH 18028.846 Hz  
FIDRES 0.275098 Hz  
AQ 1.8175317 sec  
RG 203  
DW 27.733 usec  
DE 6.50 usec  
TE -59.1 K  
D1 2.00000000 sec  
D11 0.03000000 sec  
TD0 1

===== CHANNEL f1 =====  
SFO1 75.4752949 MHz  
NUC1 13C  
P1 9.50 usec  
PLW1 34.20000076 W

===== CHANNEL f2 =====  
SFO2 300.1312005 MHz  
NUC2 1H  
CPDPRG[2] waltz16  
PCPD2 90.00 usec  
PLW2 14.00000000 W  
PLW12 0.17284000 W  
PLW13 0.14000000 W

F2 - Processing parameters  
SI 32768  
SF 75.4677485 MHz  
WDW EM  
SSB 0  
LB 1.00 Hz  
GB 0  
PC 1.40

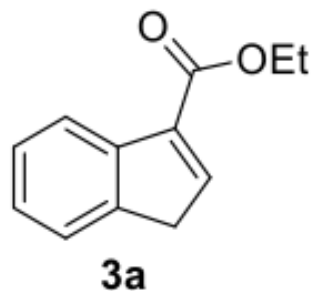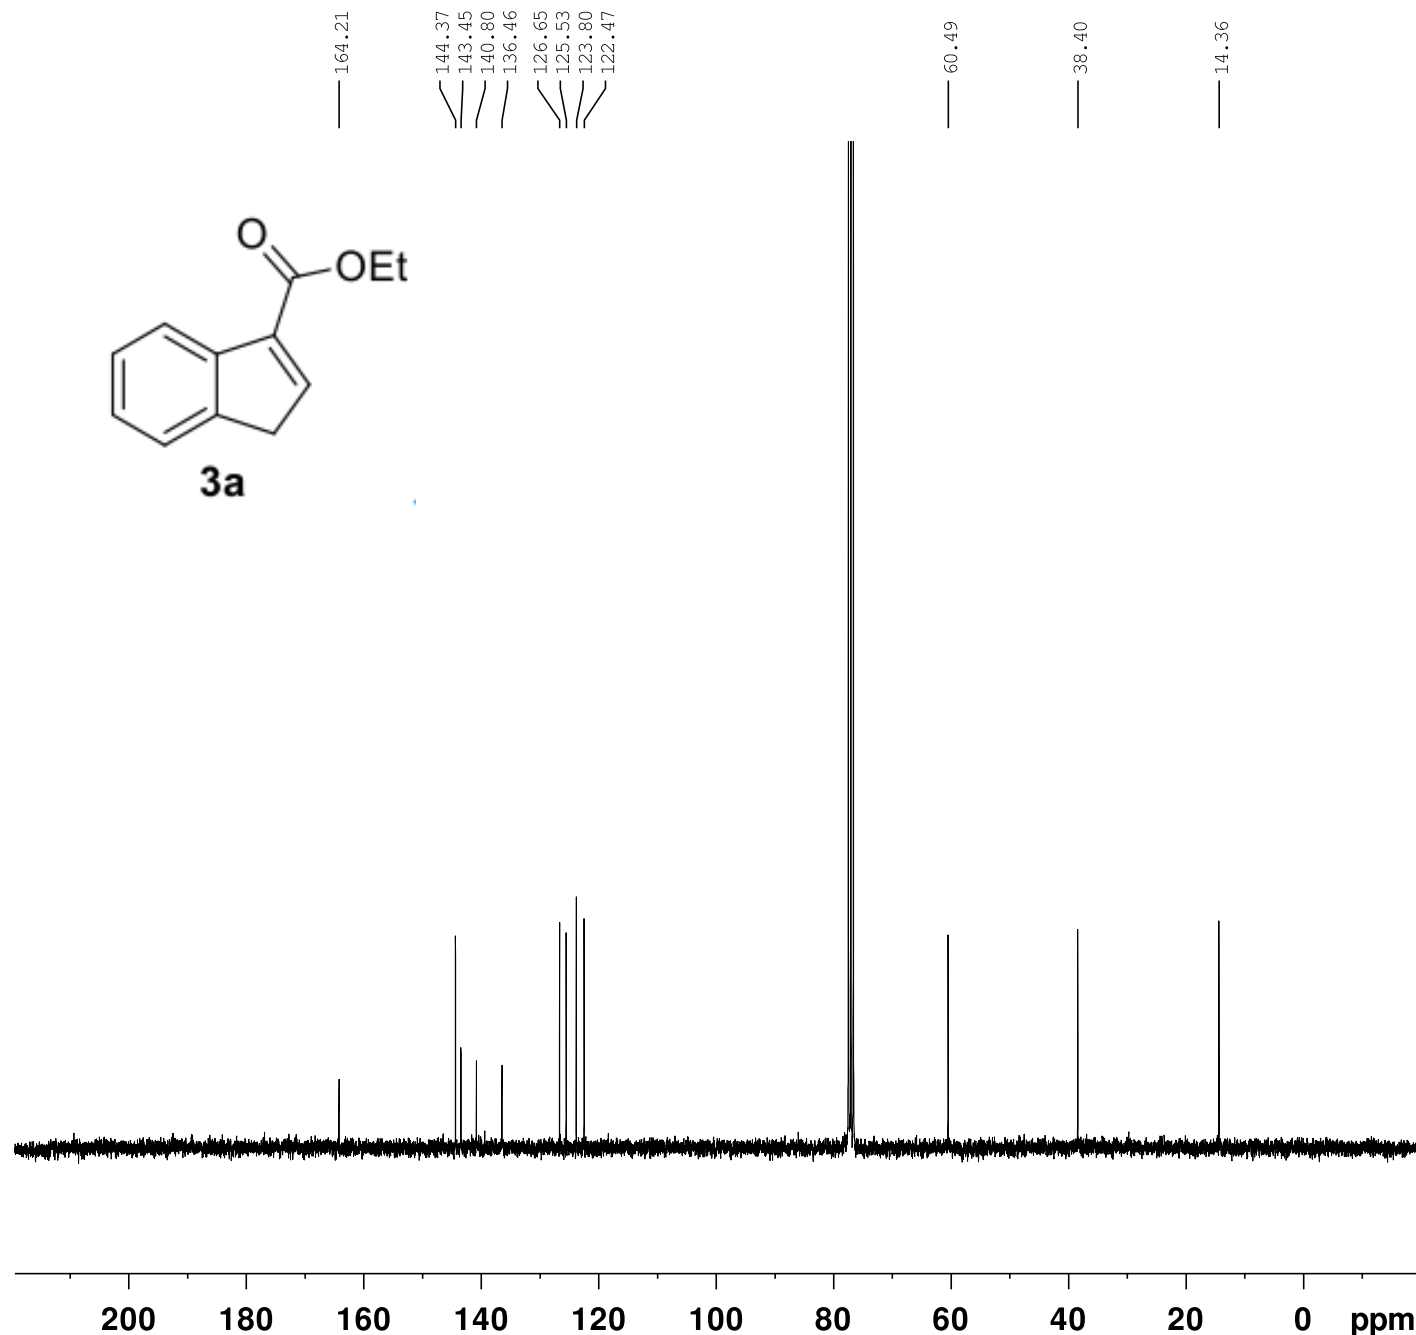

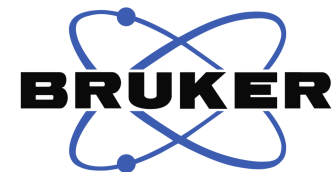

Current Data Parameters  
 NAME HNMR-YX-1-p40 (B1)  
 EXPNO 368  
 PROCNO 1

F2 - Acquisition Parameters  
 Date\_ 20220707  
 Time 16.15  
 INSTRUM spect  
 PROBHD 5 mm PABBO BB-  
 PULPROG zg30  
 TD 65536  
 SOLVENT CDCl3  
 NS 16  
 DS 2  
 SWH 6009.615 Hz  
 FIDRES 0.091699 Hz  
 AQ 5.4525952 sec  
 RG 181  
 DW 83.200 usec  
 DE 6.50 usec  
 TE -59.1 K  
 D1 1.00000000 sec  
 TD0 1

===== CHANNEL f1 =====  
 SFO1 300.1318534 MHz  
 NUC1 1H  
 P1 10.00 usec  
 PLW1 14.00000000 W

F2 - Processing parameters  
 SI 65536  
 SF 300.1300302 MHz  
 WDW EM  
 SSB 0  
 LB 0.30 Hz  
 GB 0  
 PC 1.00

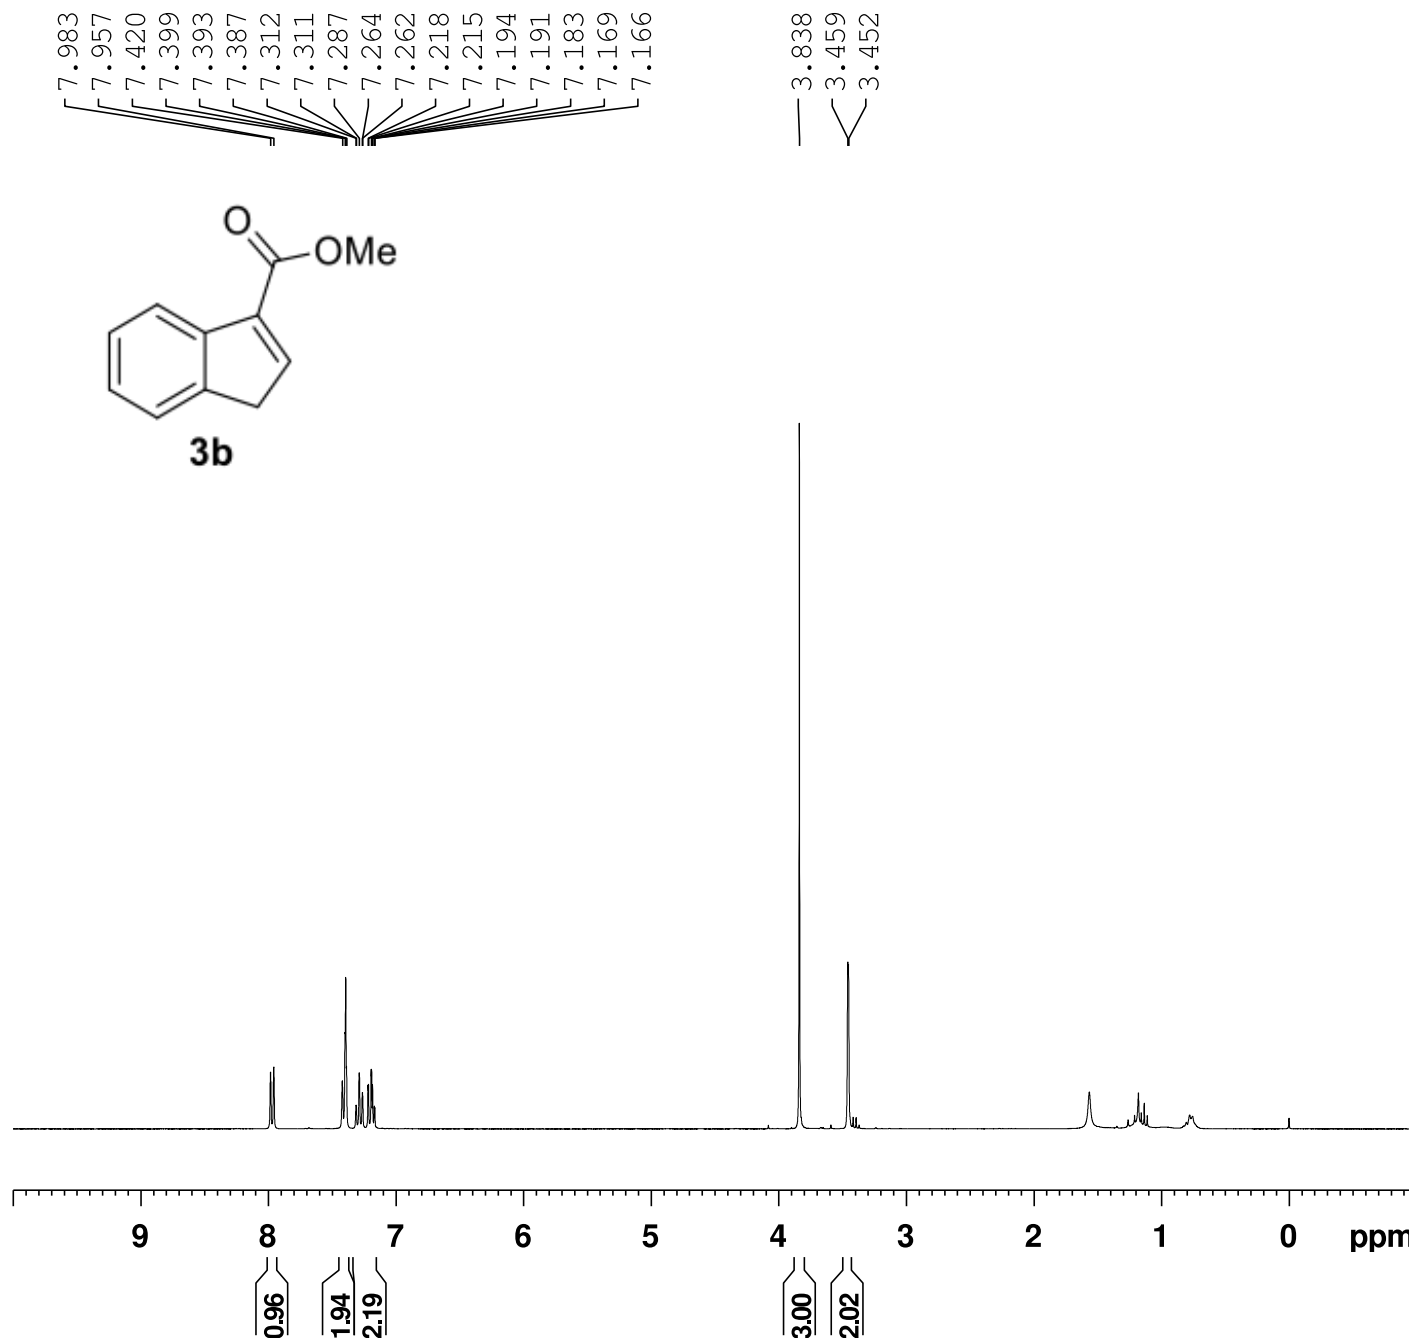





Current Data Parameters  
NAME CNMR-YX-1-p40 (B1)  
EXPNO 384  
PROCNO 1

F2 - Acquisition Parameters  
Date\_ 20220708  
Time 21.46  
INSTRUM spect  
PROBHD 5 mm PABBO BB-  
PULPROG zgpg30  
TD 65536  
SOLVENT CDCl3  
NS 600  
DS 4  
SWH 18028.846 Hz  
FIDRES 0.275098 Hz  
AQ 1.8175317 sec  
RG 203  
DW 27.733 usec  
DE 6.50 usec  
TE -59.1 K  
D1 2.00000000 sec  
D11 0.03000000 sec  
TD0 1

===== CHANNEL f1 =====  
SFO1 75.4752949 MHz  
NUC1 13C  
P1 9.50 usec  
PLW1 34.20000076 W

===== CHANNEL f2 =====  
SFO2 300.1312005 MHz  
NUC2 1H  
CPDPRG[2] waltz16  
PCPD2 90.00 usec  
PLW2 14.00000000 W  
PLW12 0.17284000 W  
PLW13 0.14000000 W

F2 - Processing parameters  
SI 32768  
SF 75.4677485 MHz  
WDW EM  
SSB 0  
LB 1.00 Hz  
GB 0  
PC 1.40

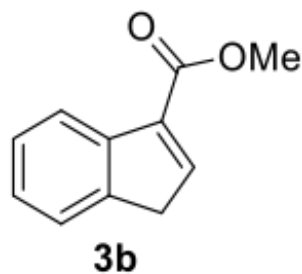

164.60  
144.57  
143.37  
140.71  
136.14  
126.68  
125.59  
123.81  
122.44

51.62  
38.47

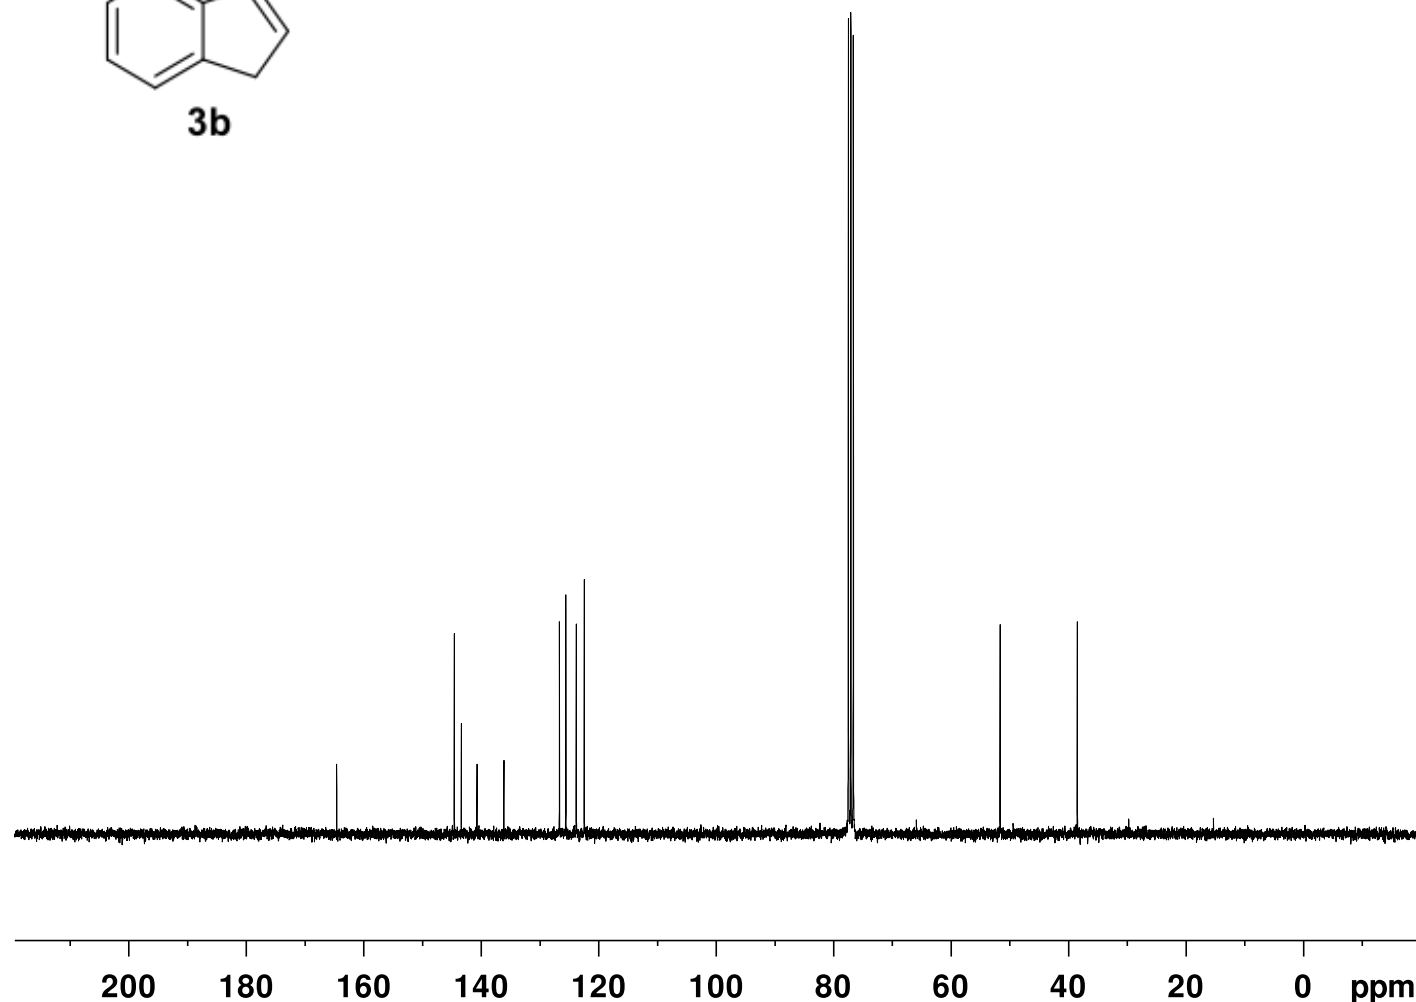



Current Data Parameters  
 NAME HNMR-YX-1-p40 (B3)  
 EXPNO 367  
 PROCNO 1

F2 - Acquisition Parameters  
 Date\_ 20220707  
 Time 16.10  
 INSTRUM spect  
 PROBHD 5 mm PABBO BB-  
 PULPROG zg30  
 TD 65536  
 SOLVENT CDCl3  
 NS 16  
 DS 2  
 SWH 6009.615 Hz  
 FIDRES 0.091699 Hz  
 AQ 5.4525952 sec  
 RG 203  
 DW 83.200 usec  
 DE 6.50 usec  
 TE -59.1 K  
 D1 1.00000000 sec  
 TD0 1

===== CHANNEL f1 =====  
 SFO1 300.1318534 MHz  
 NUC1 1H  
 P1 10.00 usec  
 PLW1 14.00000000 W

F2 - Processing parameters  
 SI 65536  
 SF 300.1300296 MHz  
 WDW EM  
 SSB 0  
 LB 0.30 Hz  
 GB 0  
 PC 1.00

7.981  
7.956  
7.415  
7.388  
7.381  
7.375  
7.307  
7.284  
7.259  
7.212  
7.209  
7.184  
7.163  
7.159  
5.233  
5.212  
5.191  
5.170  
5.149

3.444  
3.438

1.329  
1.308

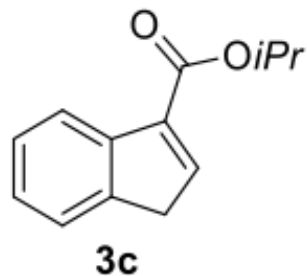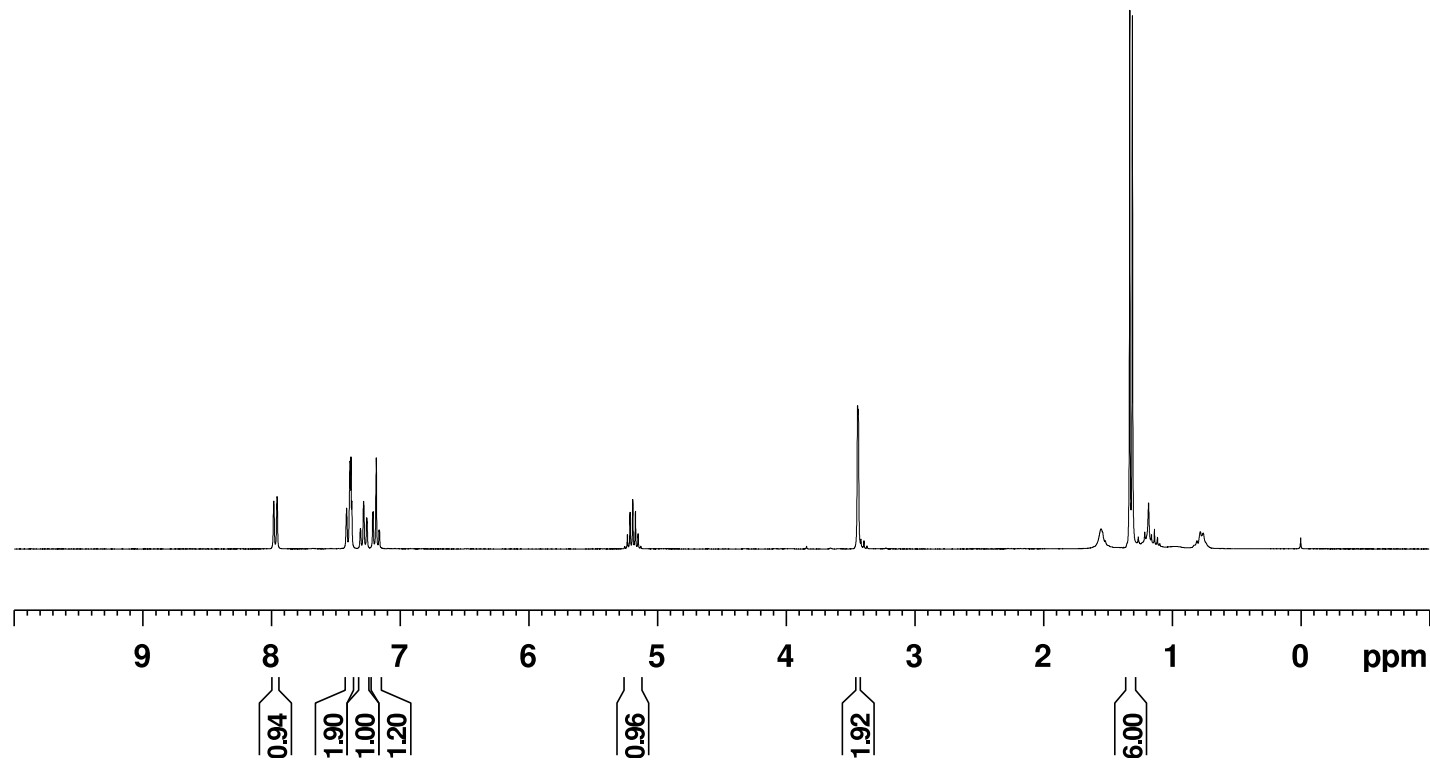

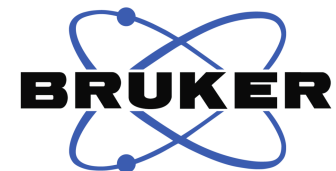

Current Data Parameters  
NAME CNMR-YX-1-p40 (B3)  
EXPNO 383  
PROCNO 1

F2 - Acquisition Parameters  
Date\_ 20220708  
Time 21.04  
INSTRUM spect  
PROBHD 5 mm PABBO BB-  
PULPROG zgpg30  
TD 65536  
SOLVENT CDCl3  
NS 600  
DS 4  
SWH 18028.846 Hz  
FIDRES 0.275098 Hz  
AQ 1.8175317 sec  
RG 203  
DW 27.733 usec  
DE 6.50 usec  
TE -59.1 K  
D1 2.00000000 sec  
D11 0.03000000 sec  
TD0 1

===== CHANNEL f1 =====  
SFO1 75.4752949 MHz  
NUC1 13C  
P1 9.50 usec  
PLW1 34.20000076 W

===== CHANNEL f2 =====  
SFO2 300.1312005 MHz  
NUC2 1H  
CPDPRG[2] waltz16  
PCPD2 90.00 usec  
PLW2 14.00000000 W  
PLW12 0.17284000 W  
PLW13 0.14000000 W

F2 - Processing parameters  
SI 32768  
SF 75.4677485 MHz  
WDW EM  
SSB 0  
LB 1.00 Hz  
GB 0  
PC 1.40

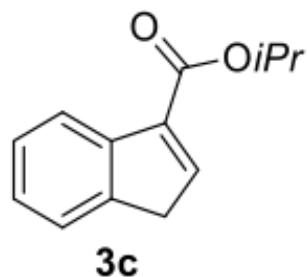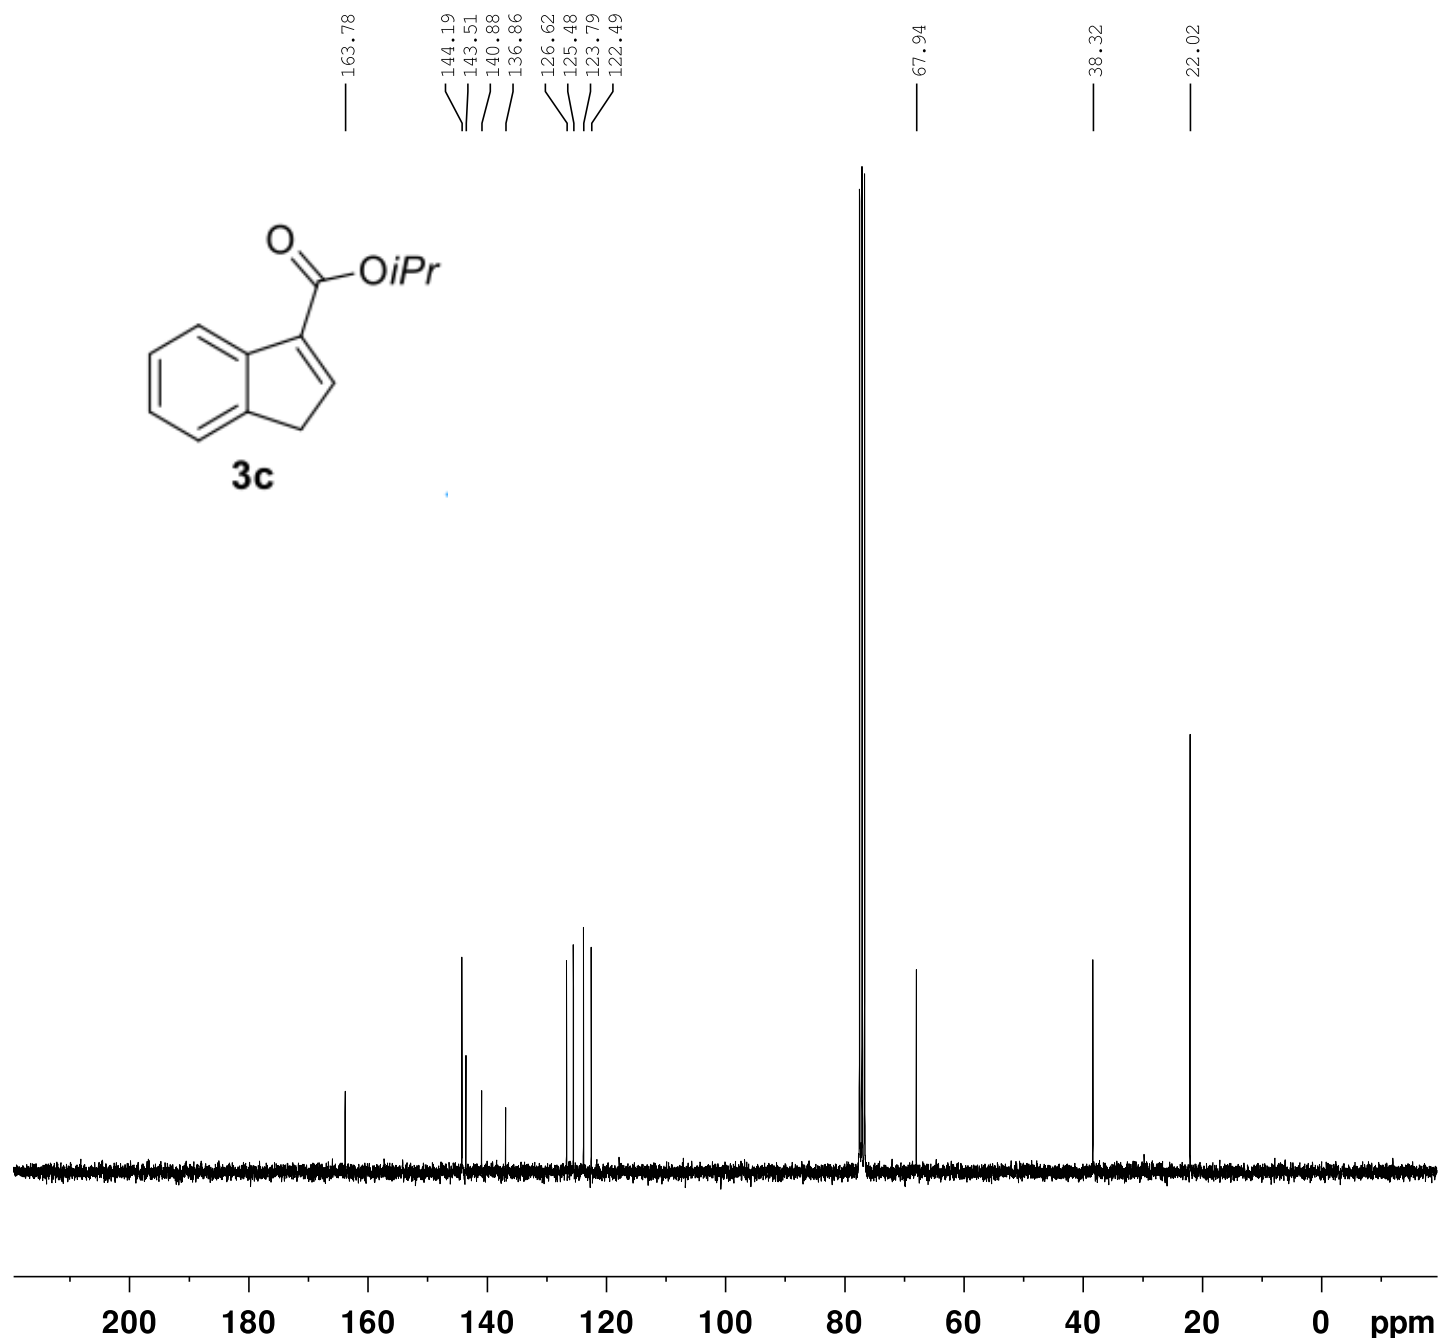

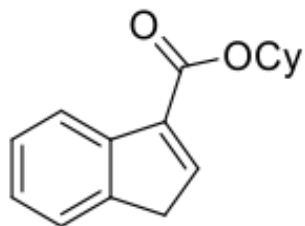

**3d**

7.986  
7.960  
7.398  
7.392  
7.283  
7.181

4.977  
4.964  
4.950  
3.443  
3.438  
1.916  
1.908  
1.889  
1.879  
1.752  
1.742  
1.720  
1.710  
1.593  
1.582  
1.551  
1.519  
1.507  
1.488  
1.479  
1.447  
1.437  
1.415  
1.404  
1.394

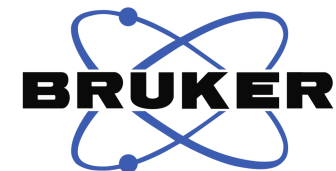

Current Data Parameters  
NAME HNMR-YX-1-p40 (B6)  
EXPNO 200  
PROCNO 1

F2 - Acquisition Parameters  
Date\_ 20220629  
Time 10.34  
INSTRUM spect  
PROBHD 5 mm PABBO BB-  
PULPROG zg30  
TD 65536  
SOLVENT CDCl3  
NS 8  
DS 2  
SWH 6009.615 Hz  
FIDRES 0.091699 Hz  
AQ 5.4525952 sec  
RG 144  
DW 83.200 usec  
DE 6.50 usec  
TE -59.1 K  
D1 1.00000000 sec  
TD0 1

===== CHANNEL f1 =====  
SFO1 300.1318534 MHz  
NUC1 1H  
P1 10.00 usec  
PLW1 14.00000000 W

F2 - Processing parameters  
SI 65536  
SF 300.1300309 MHz  
WDW EM  
SSB 0  
LB 0.30 Hz  
GB 0  
PC 1.00

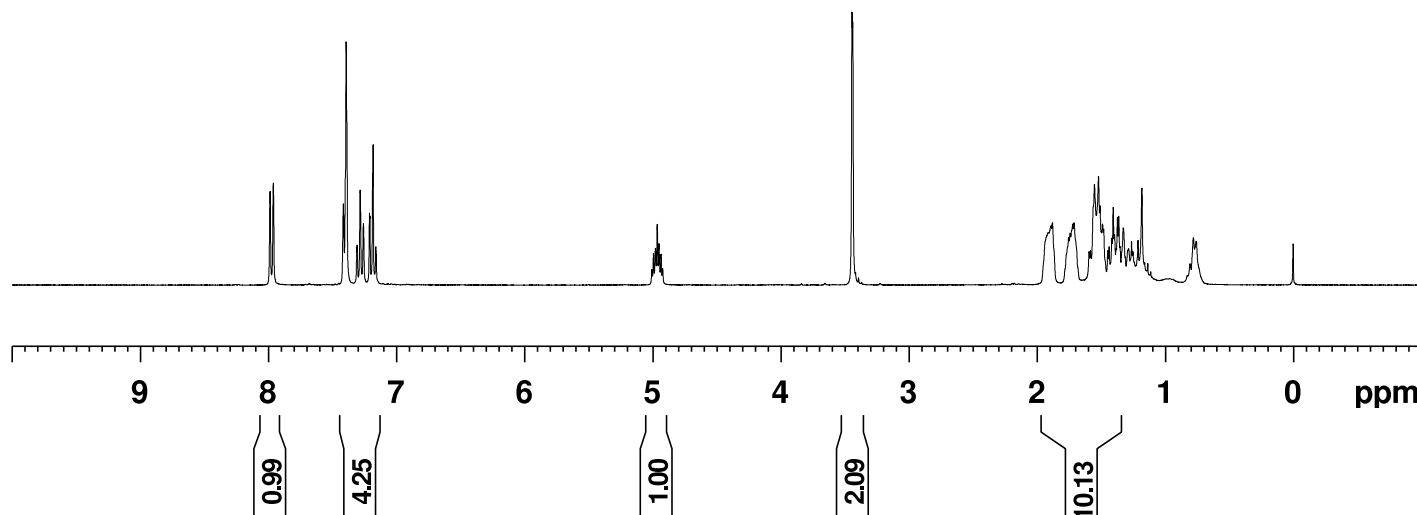



Current Data Parameters  
 NAME CNMR-YX-1-p40 (B6)  
 EXPNO 201  
 PROCNO 1

F2 - Acquisition Parameters  
 Date\_ 20220629  
 Time 10.55  
 INSTRUM spect  
 PROBHD 5 mm PABBO BB-  
 PULPROG zgpg30  
 TD 65536  
 SOLVENT CDCl3  
 NS 300  
 DS 4  
 SWH 18028.846 Hz  
 FIDRES 0.275098 Hz  
 AQ 1.8175317 sec  
 RG 203  
 DW 27.733 usec  
 DE 6.50 usec  
 TE -59.1 K  
 D1 2.00000000 sec  
 D11 0.03000000 sec  
 TD0 1

===== CHANNEL f1 =====  
 SFO1 75.4752949 MHz  
 NUC1 13C  
 P1 9.50 usec  
 PLW1 34.20000076 W

===== CHANNEL f2 =====  
 SFO2 300.1312005 MHz  
 NUC2 1H  
 CPDPRG[2] waltz16  
 PCPD2 90.00 usec  
 PLW2 14.00000000 W  
 PLW12 0.17284000 W  
 PLW13 0.14000000 W

F2 - Processing parameters  
 SI 32768  
 SF 75.4677485 MHz  
 WDW EM  
 SSB 0  
 LB 1.00 Hz  
 GB 0  
 PC 1.40

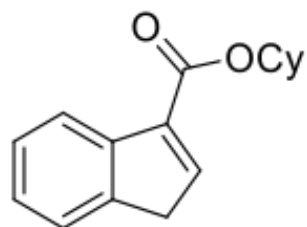

**3d**

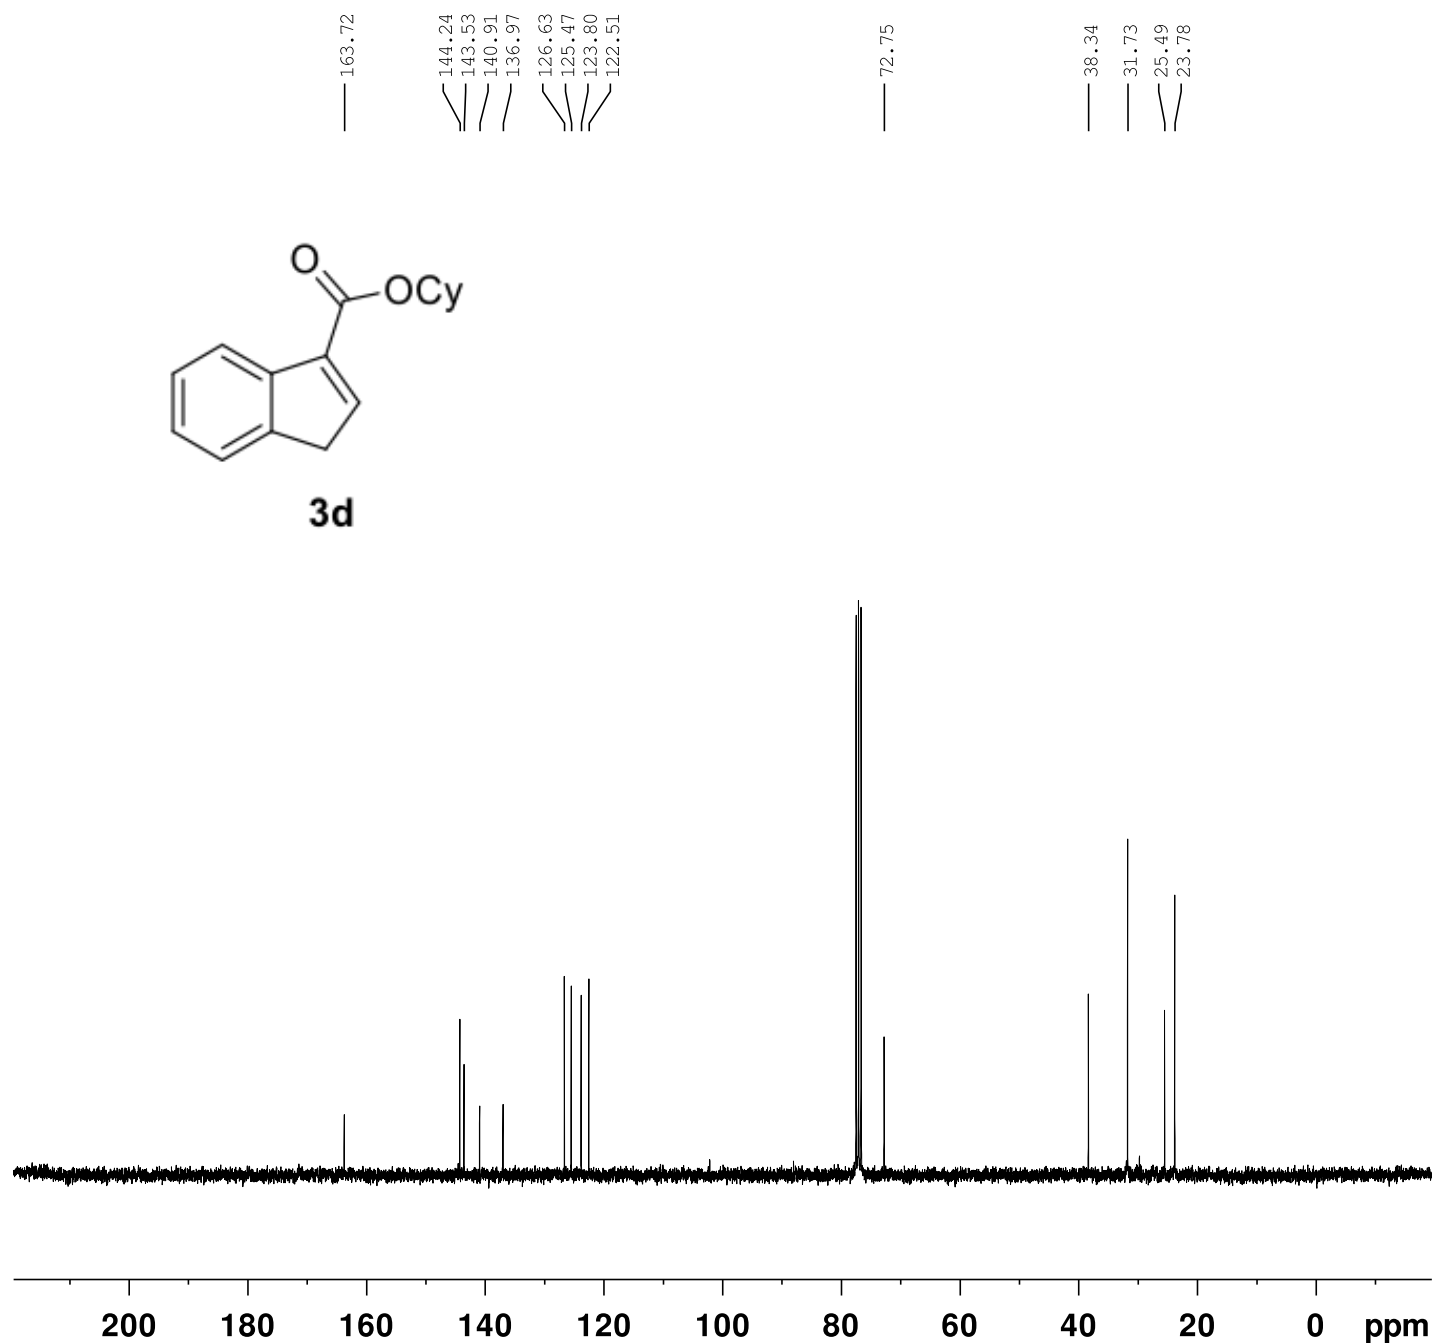



Current Data Parameters  
NAME HNMR-YX-1-p40 (B4)  
EXPNO 370  
PROCNO 1

F2 - Acquisition Parameters  
Date\_ 20220707  
Time 16.26  
INSTRUM spect  
PROBHD 5 mm PABBO BB-  
PULPROG zg30  
TD 65536  
SOLVENT CDCl3  
NS 16  
DS 2  
SWH 6009.615 Hz  
FIDRES 0.091699 Hz  
AQ 5.4525952 sec  
RG 203  
DW 83.200 usec  
DE 6.50 usec  
TE -59.1 K  
D1 1.00000000 sec  
TD0 1

===== CHANNEL f1 =====  
SFO1 300.1318534 MHz  
NUC1 1H  
P1 10.00 usec  
PLW1 14.00000000 W

F2 - Processing parameters  
SI 65536  
SF 300.1300292 MHz  
WDW EM  
SSB 0  
LB 0.30 Hz  
GB 0  
PC 1.00

7.956  
7.930  
7.407  
7.382  
7.333  
7.326  
7.320  
7.295  
7.270  
7.247  
7.201  
7.197  
7.176  
7.173  
7.152  
7.148

3.420  
3.414

1.546

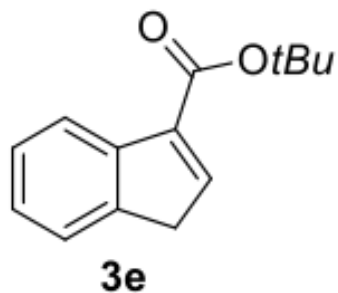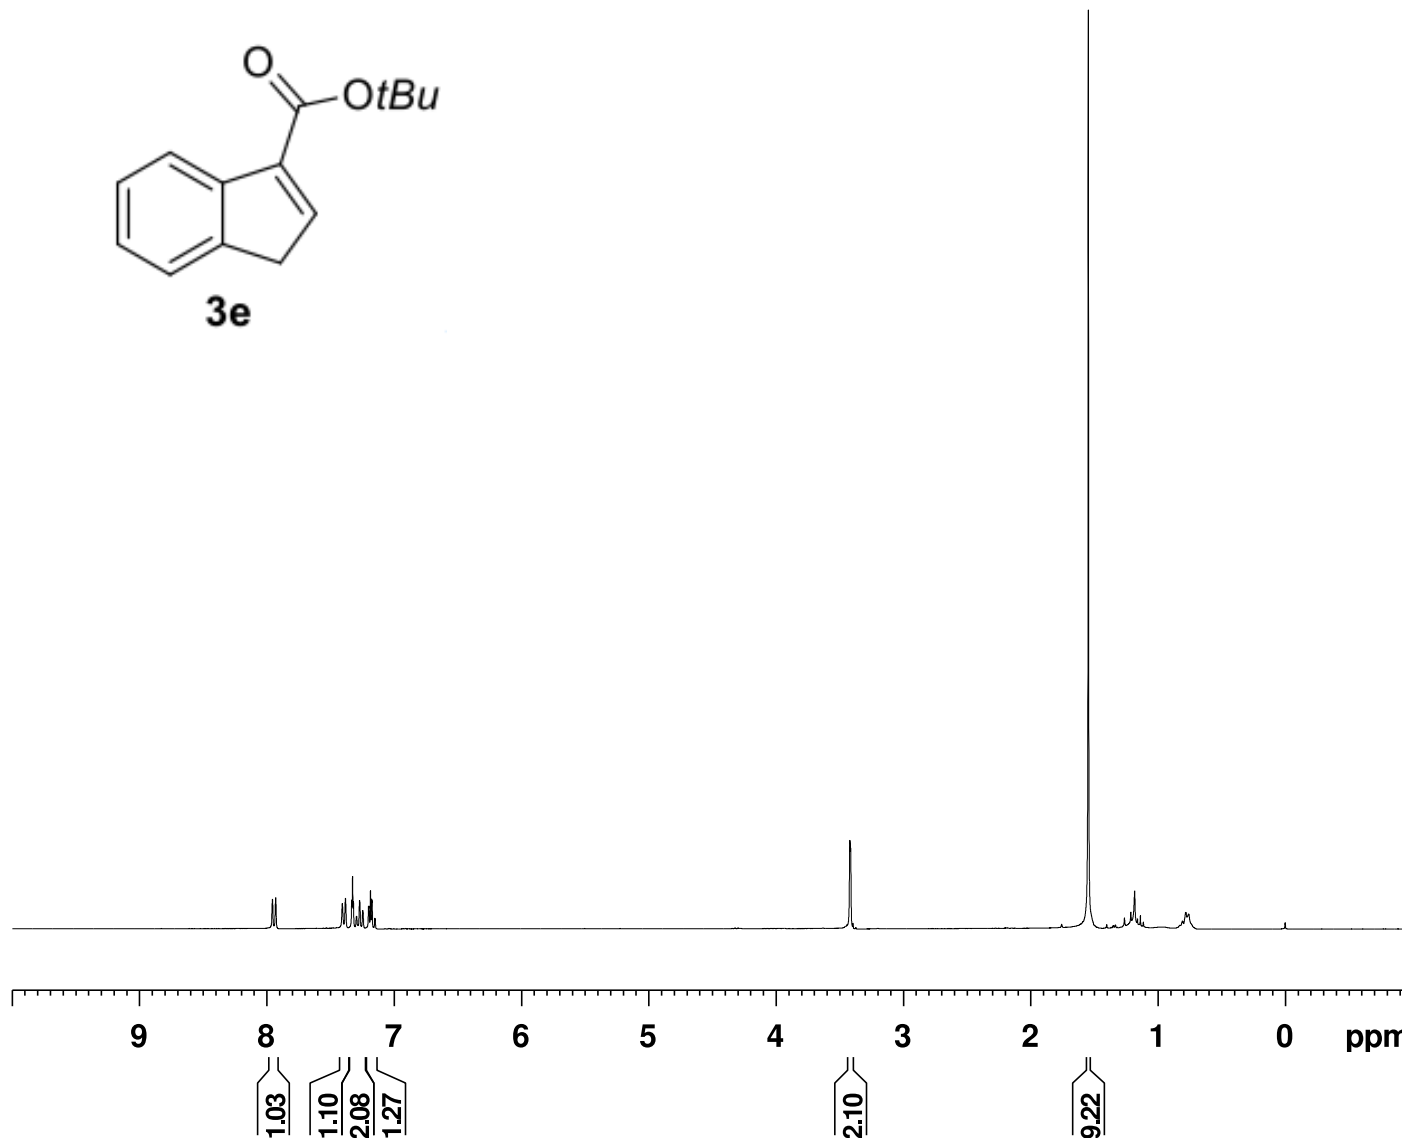



Current Data Parameters  
NAME CNMR-YX-1-p40 (B4)  
EXPNO 382  
PROCNO 1

F2 - Acquisition Parameters  
Date\_ 20220708  
Time 20.22  
INSTRUM spect  
PROBHD 5 mm PABBO BB-  
PULPROG zgpg30  
TD 65536  
SOLVENT CDCl3  
NS 600  
DS 4  
SWH 18028.846 Hz  
FIDRES 0.275098 Hz  
AQ 1.8175317 sec  
RG 203  
DW 27.733 usec  
DE 6.50 usec  
TE -59.1 K  
D1 2.00000000 sec  
D11 0.03000000 sec  
TD0 1

===== CHANNEL f1 =====  
SFO1 75.4752949 MHz  
NUC1 13C  
P1 9.50 usec  
PLW1 34.20000076 W

===== CHANNEL f2 =====  
SFO2 300.1312005 MHz  
NUC2 1H  
CPDPRG[2] waltz16  
PCPD2 90.00 usec  
PLW2 14.00000000 W  
PLW12 0.17284000 W  
PLW13 0.14000000 W

F2 - Processing parameters  
SI 32768  
SF 75.4677485 MHz  
WDW EM  
SSB 0  
LB 1.00 Hz  
GB 0  
PC 1.40

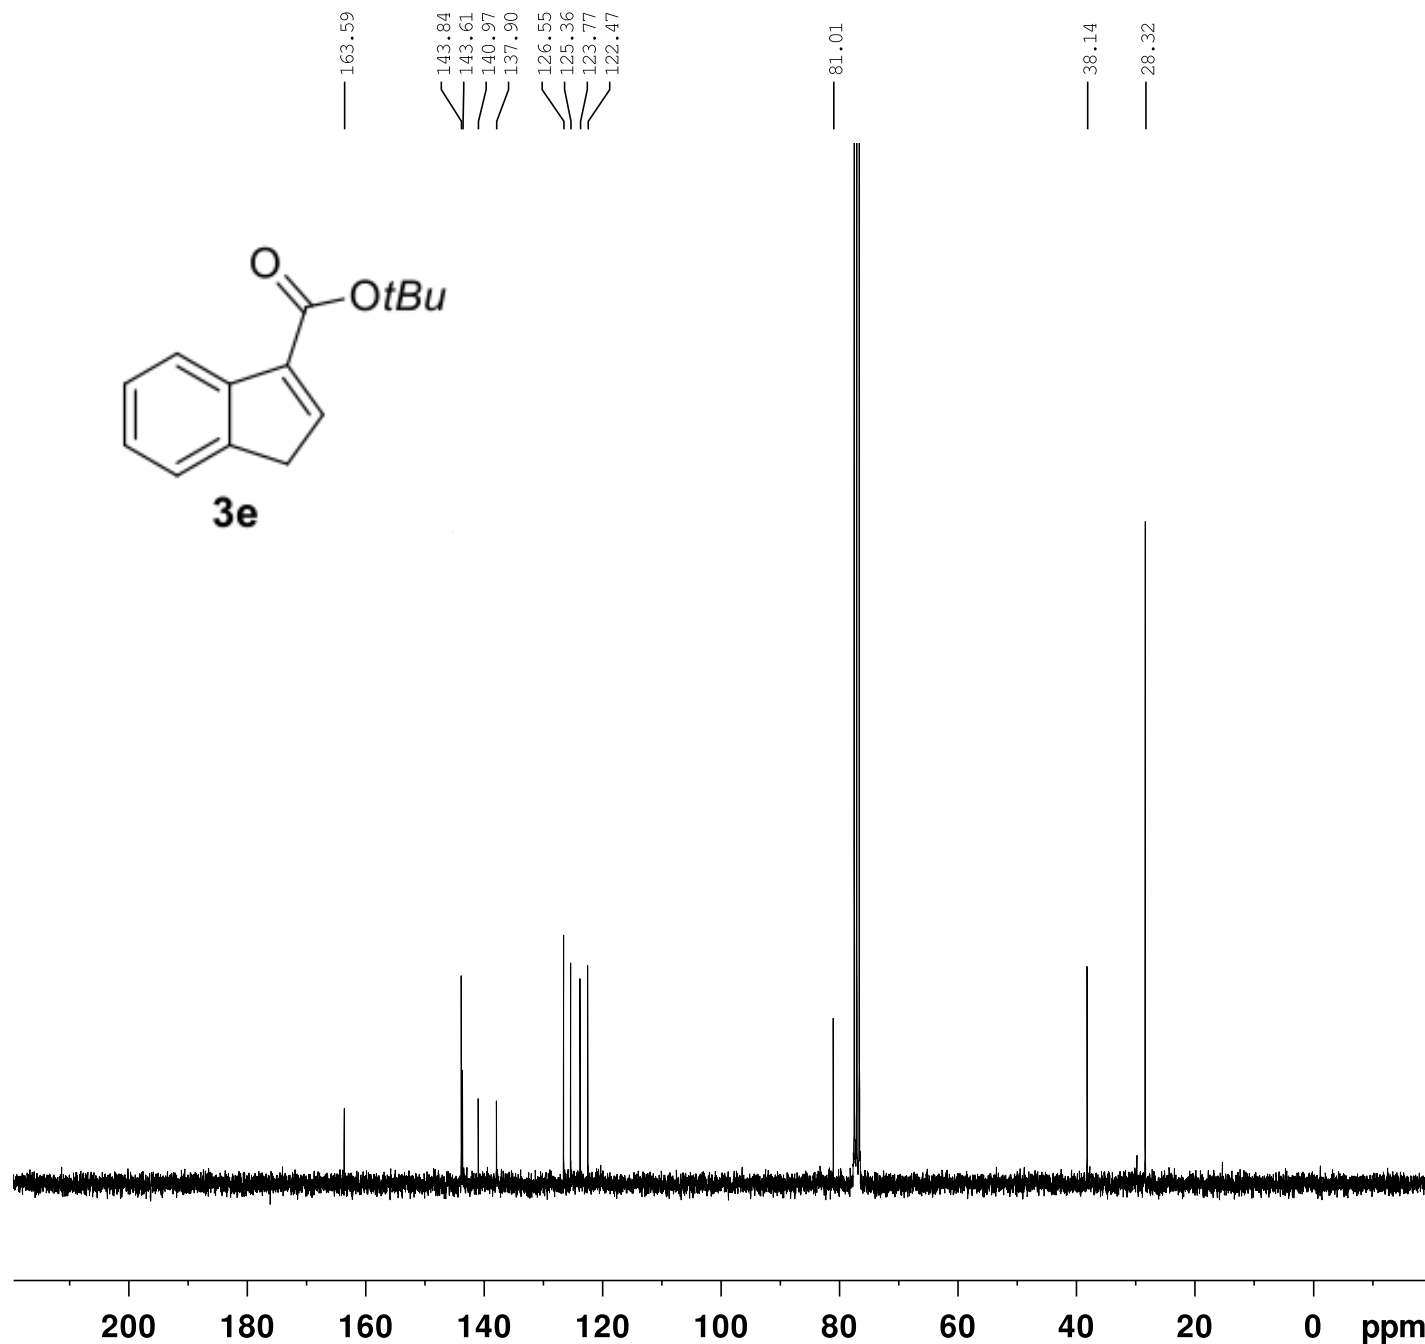



Current Data Parameters  
 NAME HNMR-YX-3-p91  
 EXPNO 103  
 PROCNO 1

F2 - Acquisition Parameters  
 Date\_ 20230406  
 Time 16.58  
 INSTRUM spect  
 PROBHD 5 mm PABBO BB-  
 PULPROG zg30  
 TD 65536  
 SOLVENT CDCl3  
 NS 16  
 DS 2  
 SWH 6009.615 Hz  
 FIDRES 0.091699 Hz  
 AQ 5.4525952 sec  
 RG 128  
 DW 83.200 usec  
 DE 6.50 usec  
 TE 289.6 K  
 D1 1.00000000 sec  
 TD0 1

===== CHANNEL f1 =====  
 SFO1 300.1318534 MHz  
 NUC1 1H  
 P1 10.00 usec  
 PLW1 14.00000000 W

F2 - Processing parameters  
 SI 65536  
 SF 300.1300180 MHz  
 WDW EM  
 SSB 0  
 LB 0.30 Hz  
 GB 0  
 PC 1.00

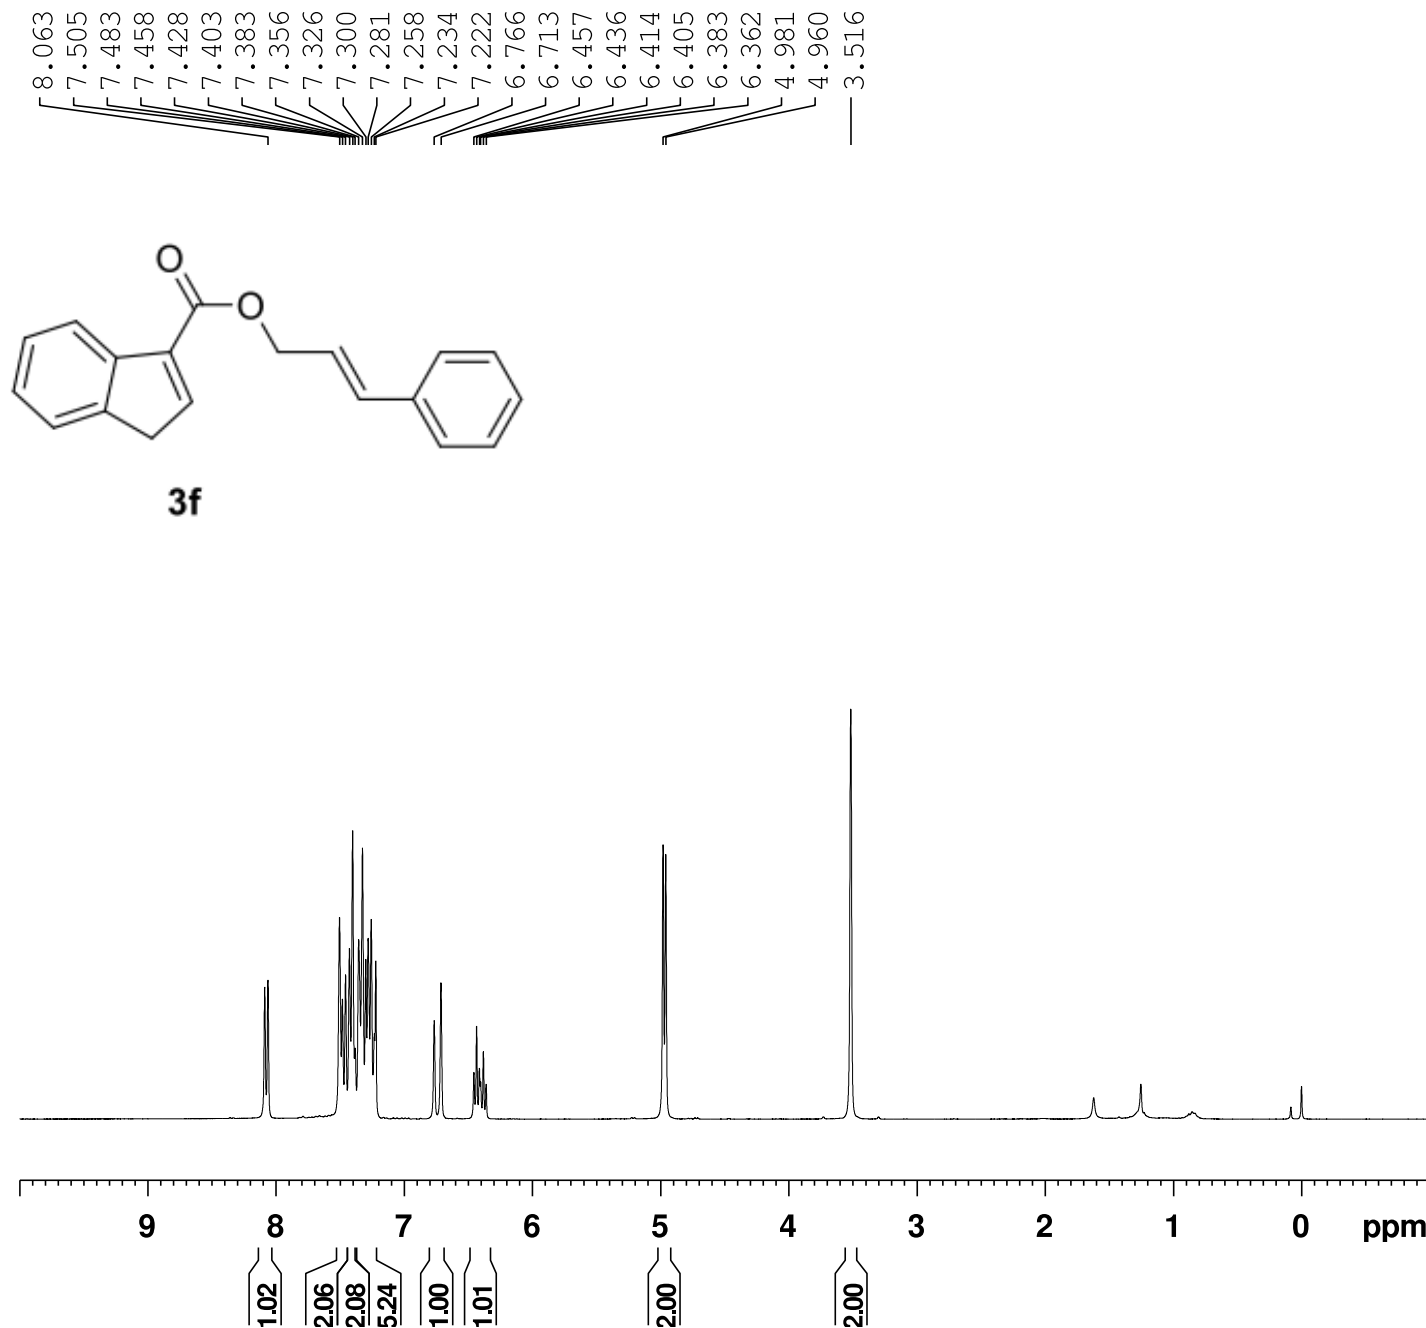



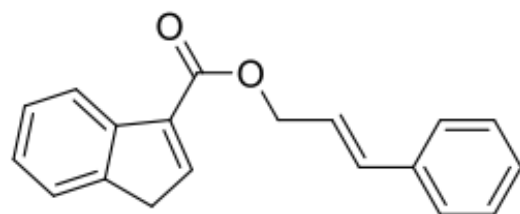

**3f**

163.91  
144.92  
143.42  
140.74  
136.26  
136.16  
134.36  
128.69  
128.16  
126.75  
126.72  
125.66  
123.87  
123.29  
122.52

65.15

38.53

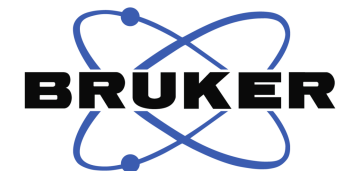

Current Data Parameters  
NAME CNMR-YX-3-p91  
EXPNO 104  
PROCNO 1

F2 - Acquisition Parameters  
Date\_ 20230406  
Time 21.47  
INSTRUM spect  
PROBHD 5 mm PABBO BB-  
PULPROG zgpg30  
TD 65536  
SOLVENT CDCl3  
NS 100  
DS 4  
SWH 18028.846 Hz  
FIDRES 0.275098 Hz  
AQ 1.8175317 sec  
RG 203  
DW 27.733 usec  
DE 6.50 usec  
TE 290.3 K  
D1 2.00000000 sec  
D11 0.03000000 sec  
TD0 1

===== CHANNEL f1 =====  
SFO1 75.4752949 MHz  
NUC1 13C  
P1 9.50 usec  
PLW1 34.20000076 W

===== CHANNEL f2 =====  
SFO2 300.1312005 MHz  
NUC2 1H  
CPDPRG[2] waltz16  
PCPD2 90.00 usec  
PLW2 14.00000000 W  
PLW12 0.17284000 W  
PLW13 0.14000000 W

F2 - Processing parameters  
SI 32768  
SF 75.4677485 MHz  
WDW EM  
SSB 0  
LB 1.00 Hz  
GB 0  
PC 1.40

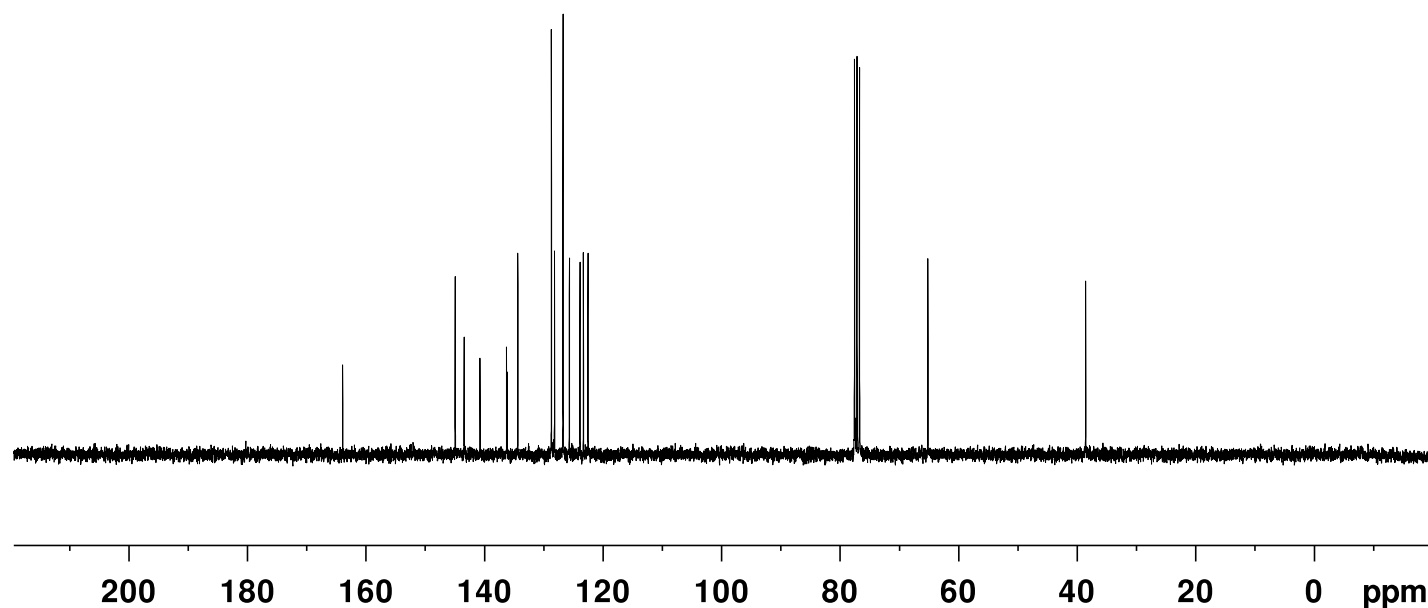



Current Data Parameters  
 NAME HNMR-YX-1-p40 (B5)  
 EXPNO 202  
 PROCNO 1

F2 - Acquisition Parameters  
 Date\_ 20220630  
 Time 9.04  
 INSTRUM spect  
 PROBHD 5 mm PABBO BB-  
 PULPROG zg30  
 TD 65536  
 SOLVENT CDCl3  
 NS 16  
 DS 2  
 SWH 6009.615 Hz  
 FIDRES 0.091699 Hz  
 AQ 5.4525952 sec  
 RG 181  
 DW 83.200 usec  
 DE 6.50 usec  
 TE -59.1 K  
 D1 1.00000000 sec  
 TD0 1

===== CHANNEL f1 =====  
 SFO1 300.1318534 MHz  
 NUC1 1H  
 P1 10.00 usec  
 PLW1 14.00000000 W

F2 - Processing parameters  
 SI 65536  
 SF 300.1300316 MHz  
 WDW EM  
 SSB 0  
 LB 0.30 Hz  
 GB 0  
 PC 1.00

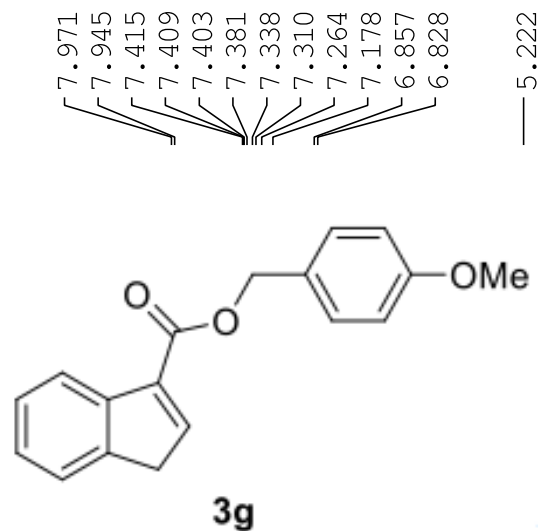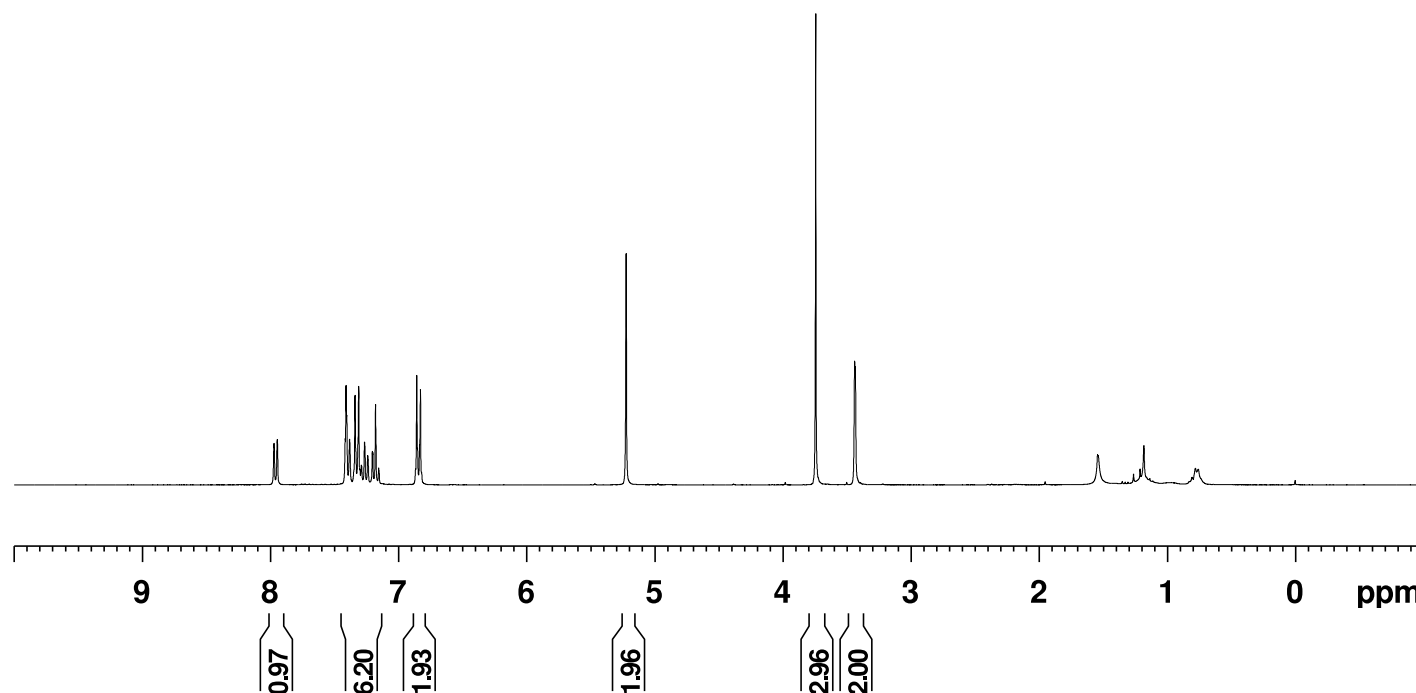



Current Data Parameters  
 NAME CNMR-YX-1-p40 (B5)  
 EXPNO 203  
 PROCNO 1

F2 - Acquisition Parameters  
 Date\_ 20220630  
 Time 9.25  
 INSTRUM spect  
 PROBHD 5 mm PABBO BB-  
 PULPROG zgpg30  
 TD 65536  
 SOLVENT CDCl3  
 NS 300  
 DS 4  
 SWH 18028.846 Hz  
 FIDRES 0.275098 Hz  
 AQ 1.8175317 sec  
 RG 203  
 DW 27.733 usec  
 DE 6.50 usec  
 TE -59.1 K  
 D1 2.00000000 sec  
 D11 0.03000000 sec  
 TD0 1

===== CHANNEL f1 =====  
 SFO1 75.4752949 MHz  
 NUC1 13C  
 P1 9.50 usec  
 PLW1 34.20000076 W

===== CHANNEL f2 =====  
 SFO2 300.1312005 MHz  
 NUC2 1H  
 CPDPRG[2] waltz16  
 PCPD2 90.00 usec  
 PLW2 14.00000000 W  
 PLW12 0.17284000 W  
 PLW13 0.14000000 W

F2 - Processing parameters  
 SI 32768  
 SF 75.4677485 MHz  
 WDW EM  
 SSB 0  
 LB 1.00 Hz  
 GB 0  
 PC 1.40

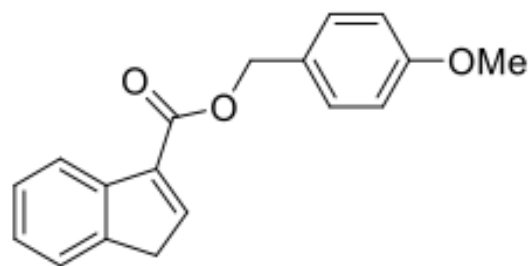

**3g**

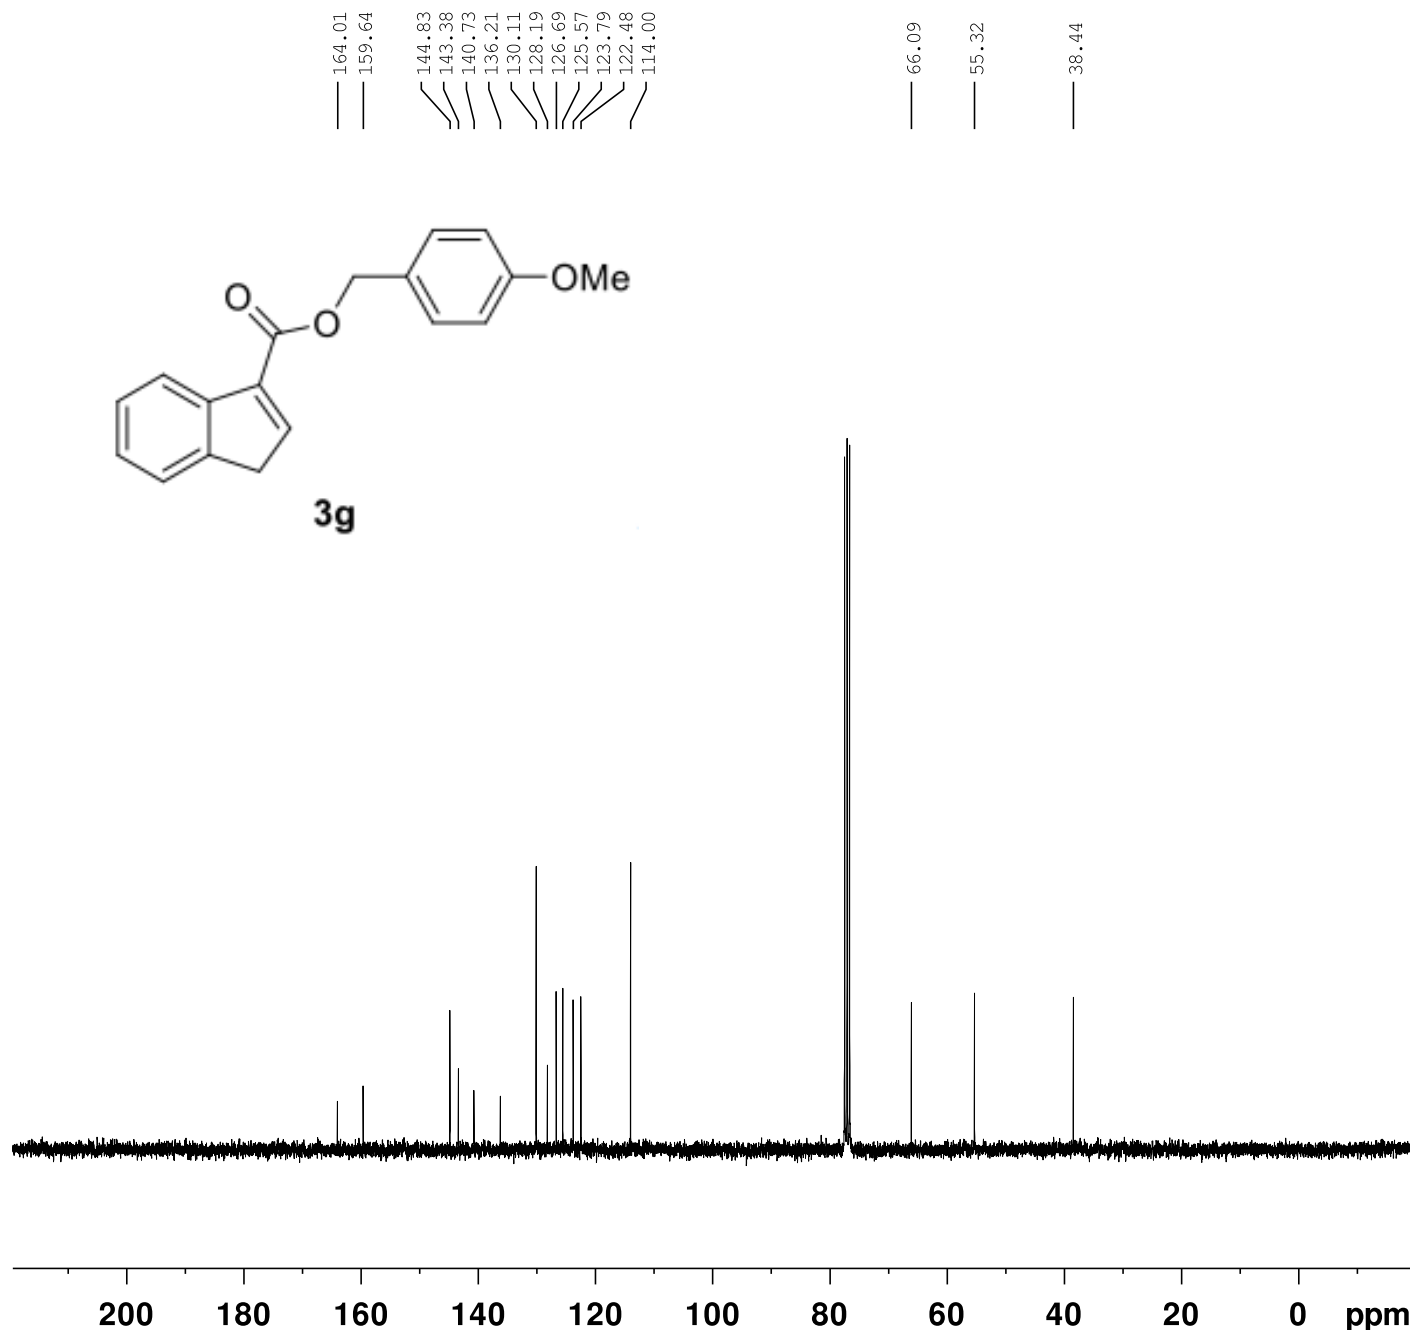



Current Data Parameters  
 NAME HNMR-YX-3-p92  
 EXPNO 58  
 PROCNO 1

F2 - Acquisition Parameters  
 Date\_ 20230331  
 Time 23.01  
 INSTRUM spect  
 PROBHD 5 mm PABBO BB-  
 PULPROG zg30  
 TD 65536  
 SOLVENT CDCl3  
 NS 16  
 DS 2  
 SWH 6009.615 Hz  
 FIDRES 0.091699 Hz  
 AQ 5.4525952 sec  
 RG 144  
 DW 83.200 usec  
 DE 6.50 usec  
 TE 291.1 K  
 D1 1.00000000 sec  
 TD0 1

===== CHANNEL f1 =====  
 SFO1 300.1318534 MHz  
 NUC1 1H  
 P1 10.00 usec  
 PLW1 14.00000000 W

F2 - Processing parameters  
 SI 65536  
 SF 300.1300151 MHz  
 WDW EM  
 SSB 0  
 LB 0.30 Hz  
 GB 0  
 PC 1.00

8.077  
8.052  
7.513  
7.477  
7.457  
7.440  
7.389  
7.366  
7.344  
7.318  
7.291  
7.277  
7.253  
7.232  
6.168  
6.146  
6.124  
6.102

— 3.511

1.697  
1.675

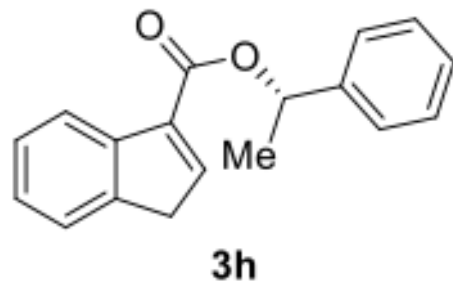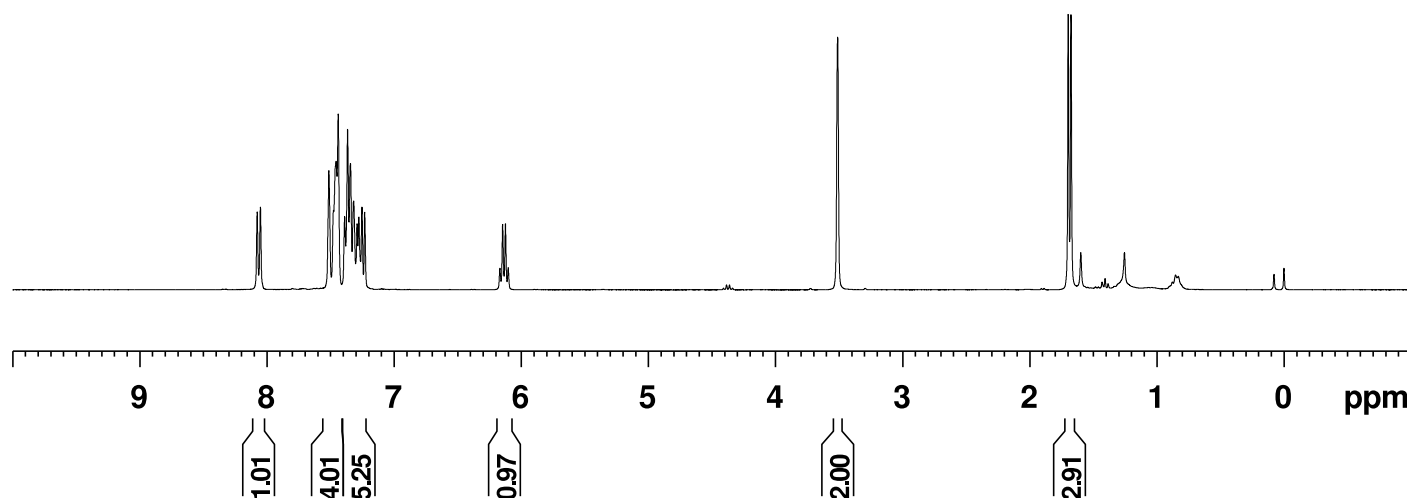



Current Data Parameters  
 NAME CNMR-YX-3-p92  
 EXPNO 59  
 PROCNO 1

F2 - Acquisition Parameters  
 Date\_ 20230331  
 Time 23.19  
 INSTRUM spect  
 PROBHD 5 mm PABBO BB-  
 PULPROG zgpg30  
 TD 65536  
 SOLVENT CDCl3  
 NS 250  
 DS 4  
 SWH 18028.846 Hz  
 FIDRES 0.275098 Hz  
 AQ 1.8175317 sec  
 RG 203  
 DW 27.733 usec  
 DE 6.50 usec  
 TE 291.6 K  
 D1 2.00000000 sec  
 D11 0.03000000 sec  
 TD0 1

===== CHANNEL f1 =====  
 SFO1 75.4752949 MHz  
 NUC1 13C  
 P1 9.50 usec  
 PLW1 34.20000076 W

===== CHANNEL f2 =====  
 SFO2 300.1312005 MHz  
 NUC2 1H  
 CPDPRG[2] waltz16  
 PCPD2 90.00 usec  
 PLW2 14.00000000 W  
 PLW12 0.17284000 W  
 PLW13 0.14000000 W

F2 - Processing parameters  
 SI 32768  
 SF 75.4677485 MHz  
 WDW EM  
 SSB 0  
 LB 1.00 Hz  
 GB 0  
 PC 1.40

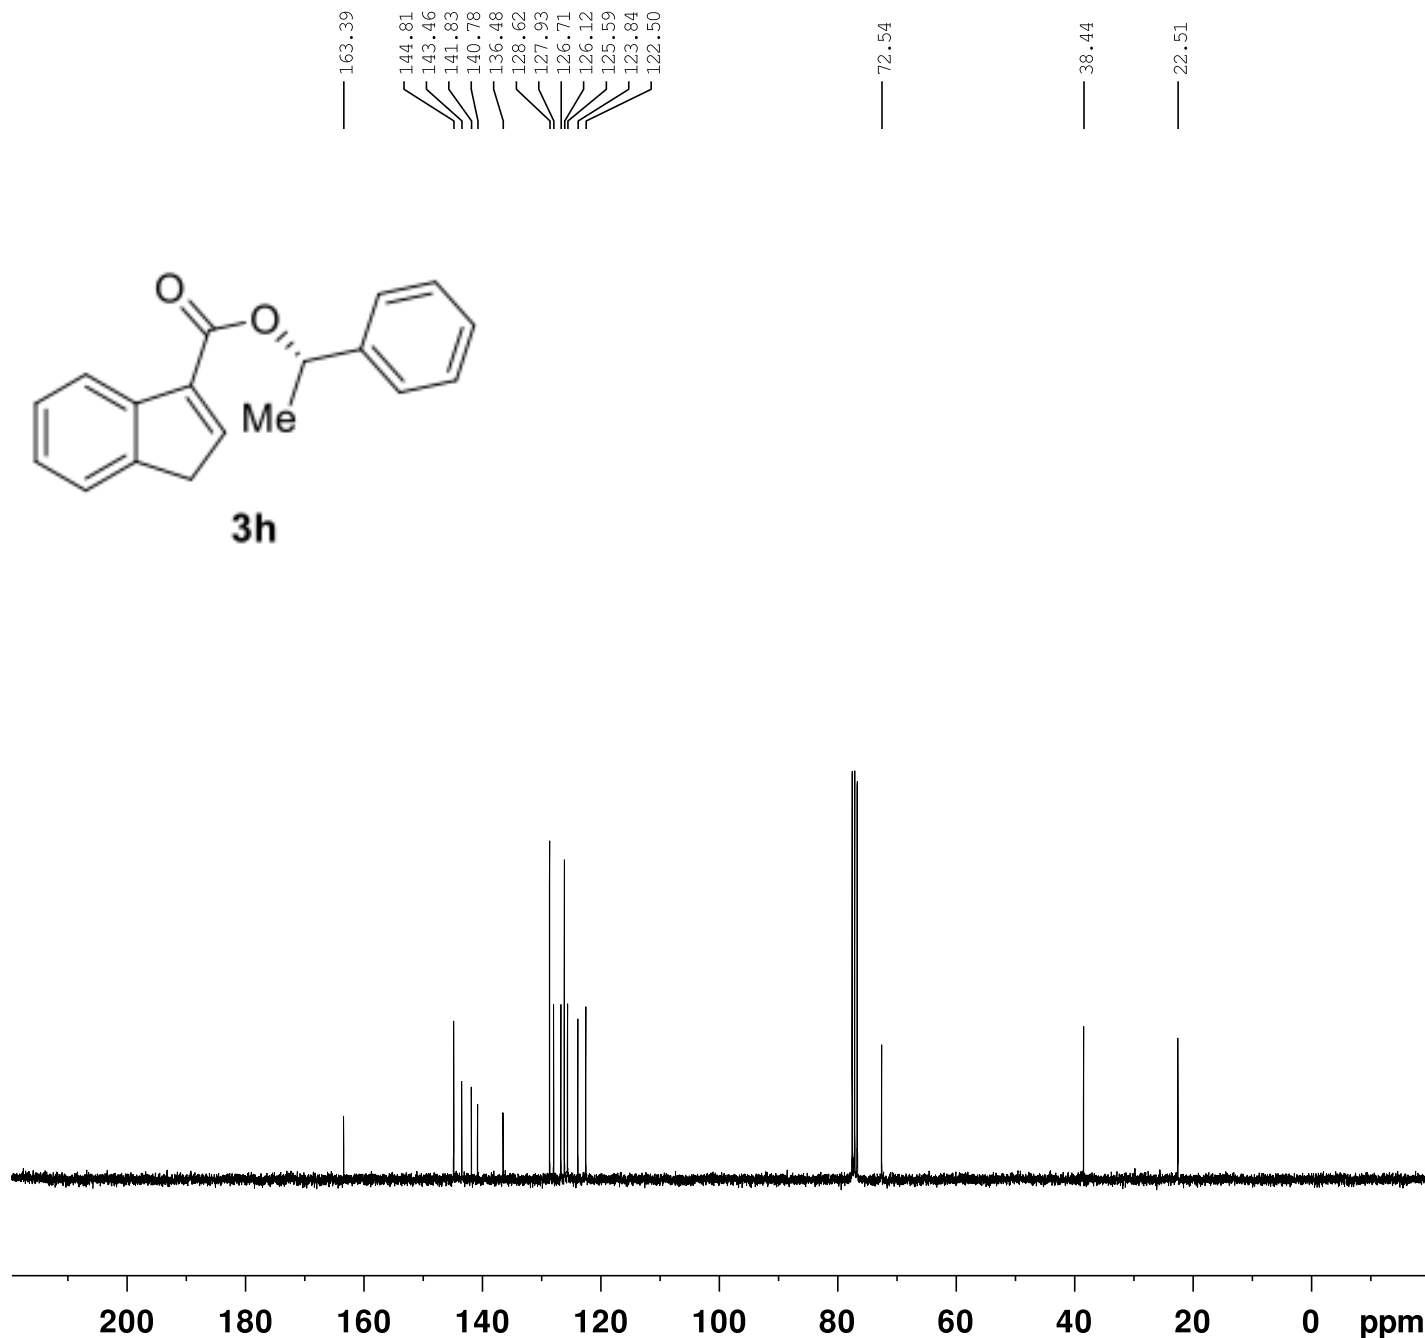

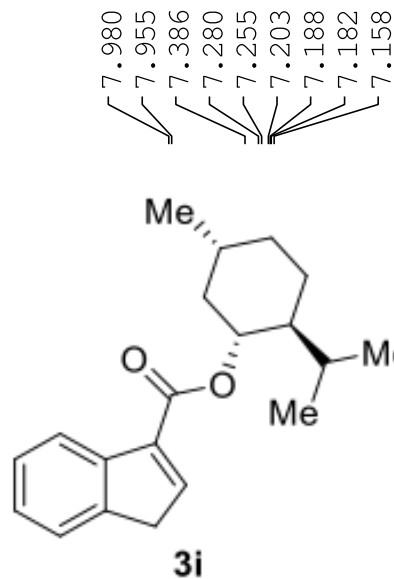

7.980  
7.955  
7.386  
7.280  
7.255  
7.203  
7.188  
7.182  
7.158

4.912  
4.877  
4.863  
4.841

3.443  
2.092  
2.059  
1.929  
1.915  
1.683  
1.644  
1.523  
1.492  
1.107  
1.080  
1.044  
0.868  
0.860  
0.854  
0.750  
0.738  
0.720



Current Data Parameters  
NAME HNMR-YX-1-p50  
EXPNO 374  
PROCNO 1

F2 - Acquisition Parameters  
Date\_ 20220708  
Time 14.15  
INSTRUM spect  
PROBHD 5 mm PABBO BB-  
PULPROG zg30  
TD 65536  
SOLVENT CDC13  
NS 16  
DS 2  
SWH 6009.615 Hz  
FIDRES 0.091699 Hz  
AQ 5.452592 sec  
RG 144  
DW 83.200 usec  
DE 6.50 usec  
TE -59.1 K  
D1 1.00000000 sec  
TD0 1

===== CHANNEL f1 =====  
SFO1 300.1318534 MHz  
NUC1 1H  
P1 10.00 usec  
PLW1 14.00000000 W

F2 - Processing parameters  
SI 65536  
SF 300.1300311 MHz  
WDW EM  
SSB 0  
LB 0.30 Hz  
GB 0  
PC 1.00

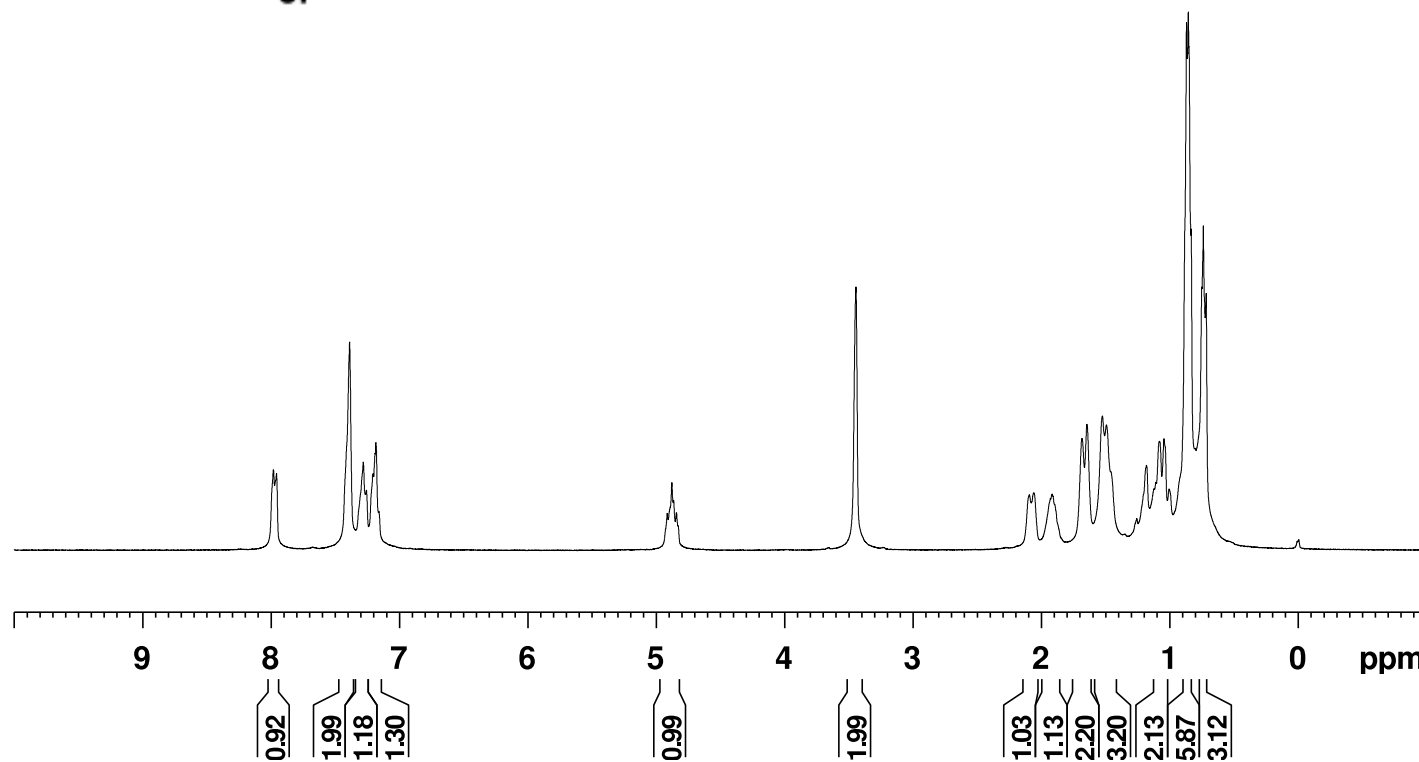



Current Data Parameters  
NAME CNMR-YX-1-p50  
EXPNO 389  
PROCNO 1

F2 - Acquisition Parameters  
Date\_ 20220709  
Time 3.31  
INSTRUM spect  
PROBHD 5 mm PABBO BB-  
PULPROG zgpg30  
TD 65536  
SOLVENT Acetone  
NS 600  
DS 4  
SWH 18028.846 Hz  
FIDRES 0.275098 Hz  
AQ 1.8175317 sec  
RG 203  
DW 27.733 usec  
DE 6.50 usec  
TE -59.1 K  
D1 2.00000000 sec  
D11 0.03000000 sec  
TD0 1

===== CHANNEL f1 =====  
SFO1 75.4752949 MHz  
NUC1 13C  
P1 9.50 usec  
PLW1 34.20000076 W

===== CHANNEL f2 =====  
SFO2 300.1312005 MHz  
NUC2 1H  
CPDPRG[2] waltz16  
PCPD2 90.00 usec  
PLW2 14.00000000 W  
PLW12 0.17284000 W  
PLW13 0.14000000 W

F2 - Processing parameters  
SI 32768  
SF 75.4677485 MHz  
WDW EM  
SSB 0  
LB 1.00 Hz  
GB 0  
PC 1.40

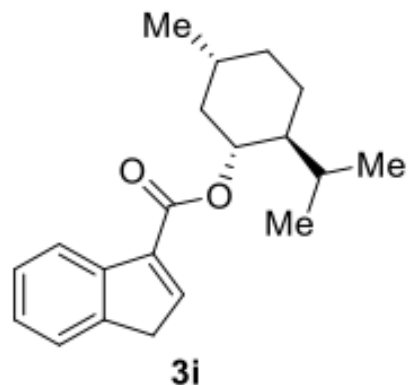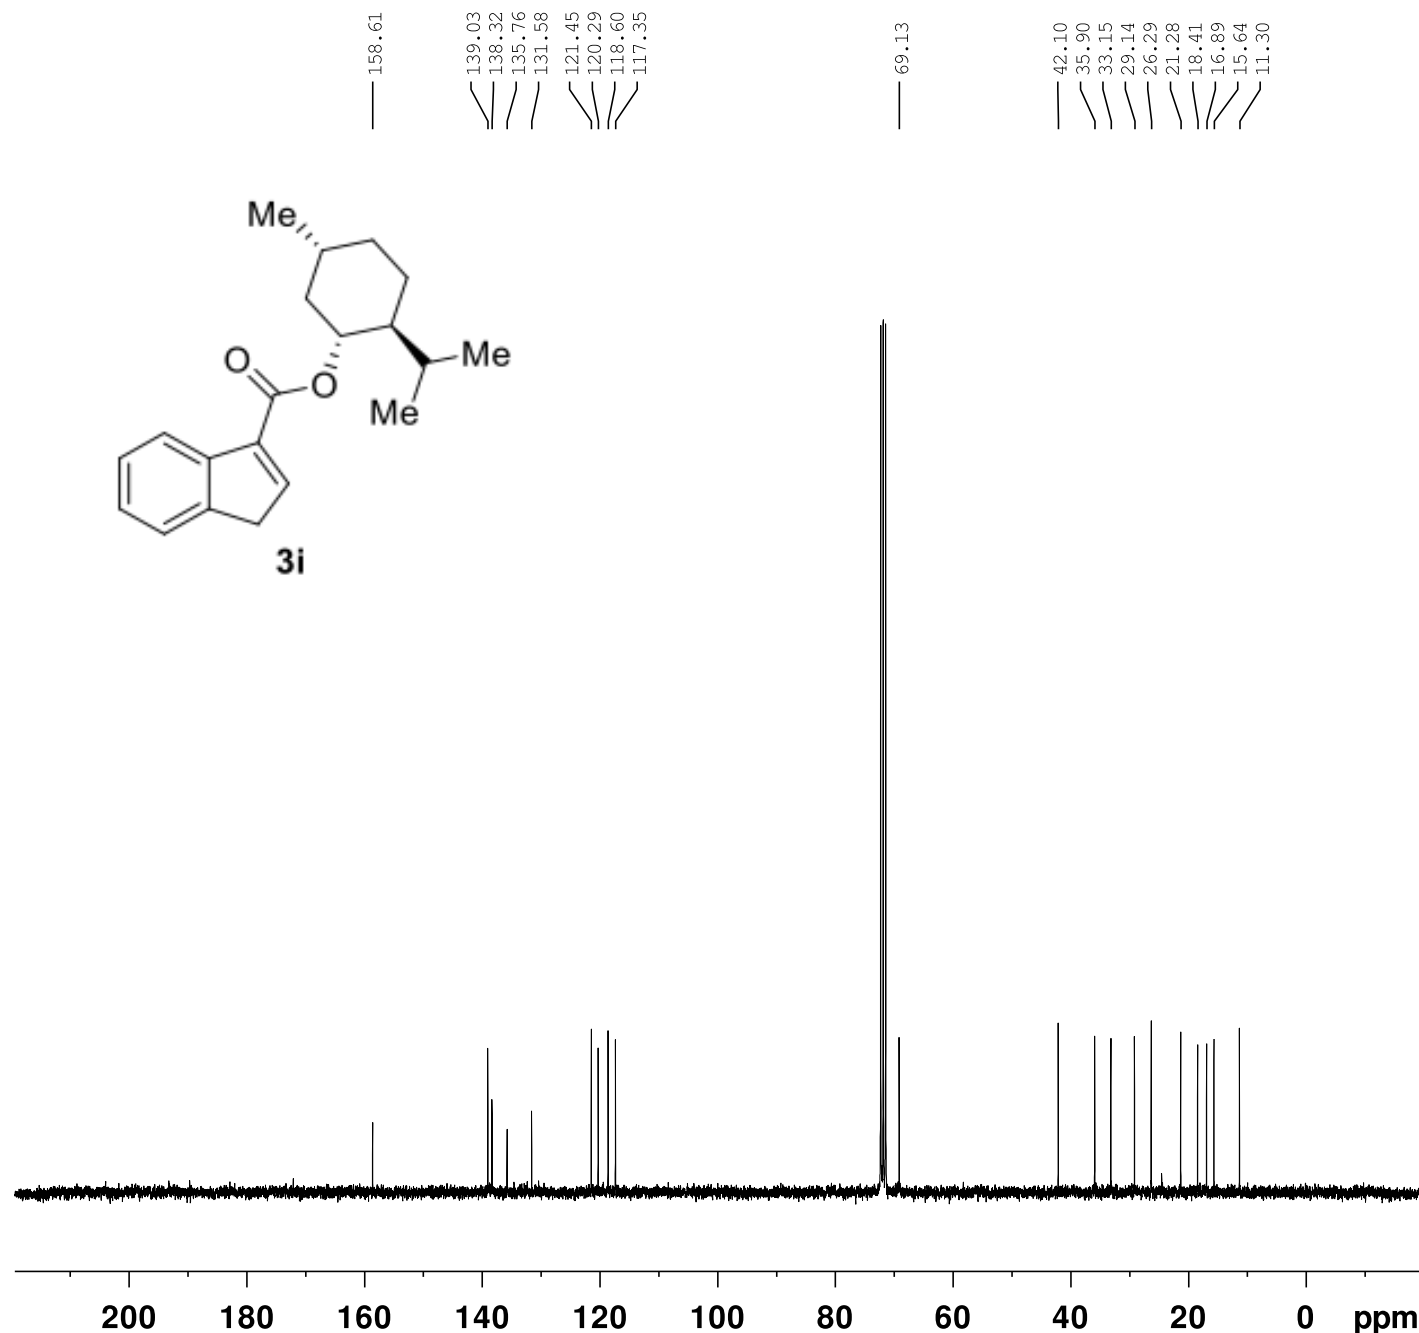



Current Data Parameters  
 NAME HNMR-YX-1-p42  
 EXPNO 375  
 PROCNO 1

F2 - Acquisition Parameters  
 Date\_ 20220708  
 Time 14.20  
 INSTRUM spect  
 PROBHD 5 mm PABBO BB-  
 PULPROG zg30  
 TD 65536  
 SOLVENT CDC13  
 NS 16  
 DS 2  
 SWH 6009.615 Hz  
 FIDRES 0.091699 Hz  
 AQ 5.4525952 sec  
 RG 128  
 DW 83.200 usec  
 DE 6.50 usec  
 TE -59.1 K  
 D1 1.00000000 sec  
 TD0 1

===== CHANNEL f1 =====  
 SFO1 300.1318534 MHz  
 NUC1 1H  
 P1 10.00 usec  
 PLW1 14.00000000 W

F2 - Processing parameters  
 SI 65536  
 SF 300.1300296 MHz  
 WDW EM  
 SSB 0  
 LB 0.30 Hz  
 GB 0  
 PC 1.00

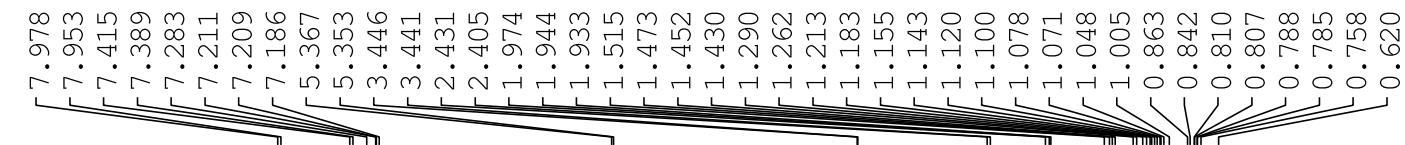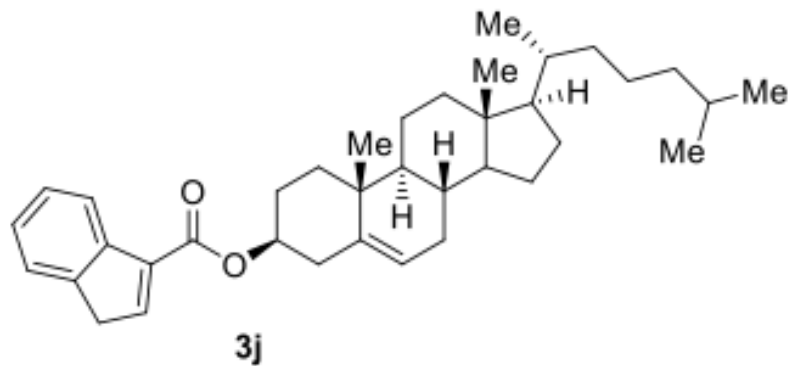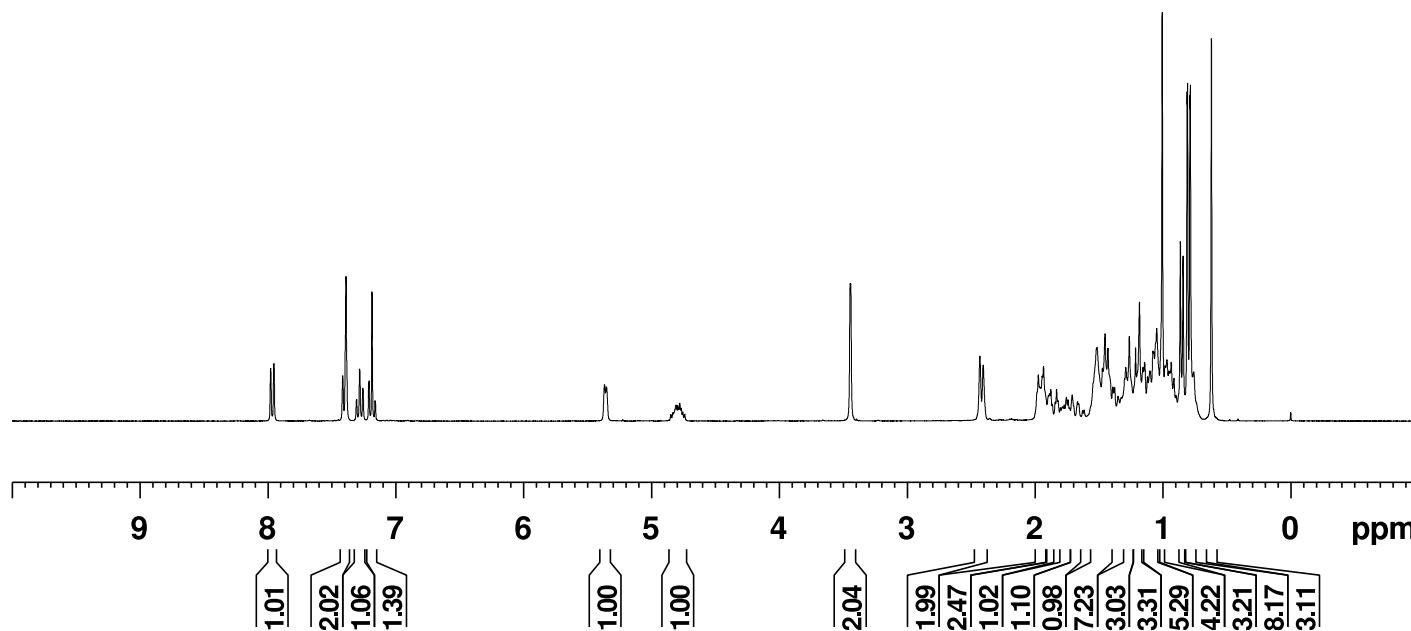





Current Data Parameters  
NAME CNMR-YX-1-p42  
EXPNO 390  
PROCNO 1

F2 - Acquisition Parameters  
Date\_ 20220709  
Time 4.13  
INSTRUM spect  
PROBHD 5 mm PABBO BB-  
PULPROG zgpg30  
TD 65536  
SOLVENT Acetone  
NS 600  
DS 4  
SWH 18028.846 Hz  
FIDRES 0.275098 Hz  
AQ 1.8175317 sec  
RG 203  
DW 27.733 usec  
DE 6.50 usec  
TE -59.1 K  
D1 2.00000000 sec  
D11 0.03000000 sec  
TD0 1

===== CHANNEL f1 =====  
SFO1 75.4752949 MHz  
NUC1 13C  
P1 9.50 usec  
PLW1 34.20000076 W

===== CHANNEL f2 =====  
SFO2 300.1312005 MHz  
NUC2 1H  
CPDPRG[2] waltz16  
PCPD2 90.00 usec  
PLW2 14.00000000 W  
PLW12 0.17284000 W  
PLW13 0.14000000 W

F2 - Processing parameters  
SI 32768  
SF 75.4677485 MHz  
WDW EM  
SSB 0  
LB 1.00 Hz  
GB 0  
PC 1.40

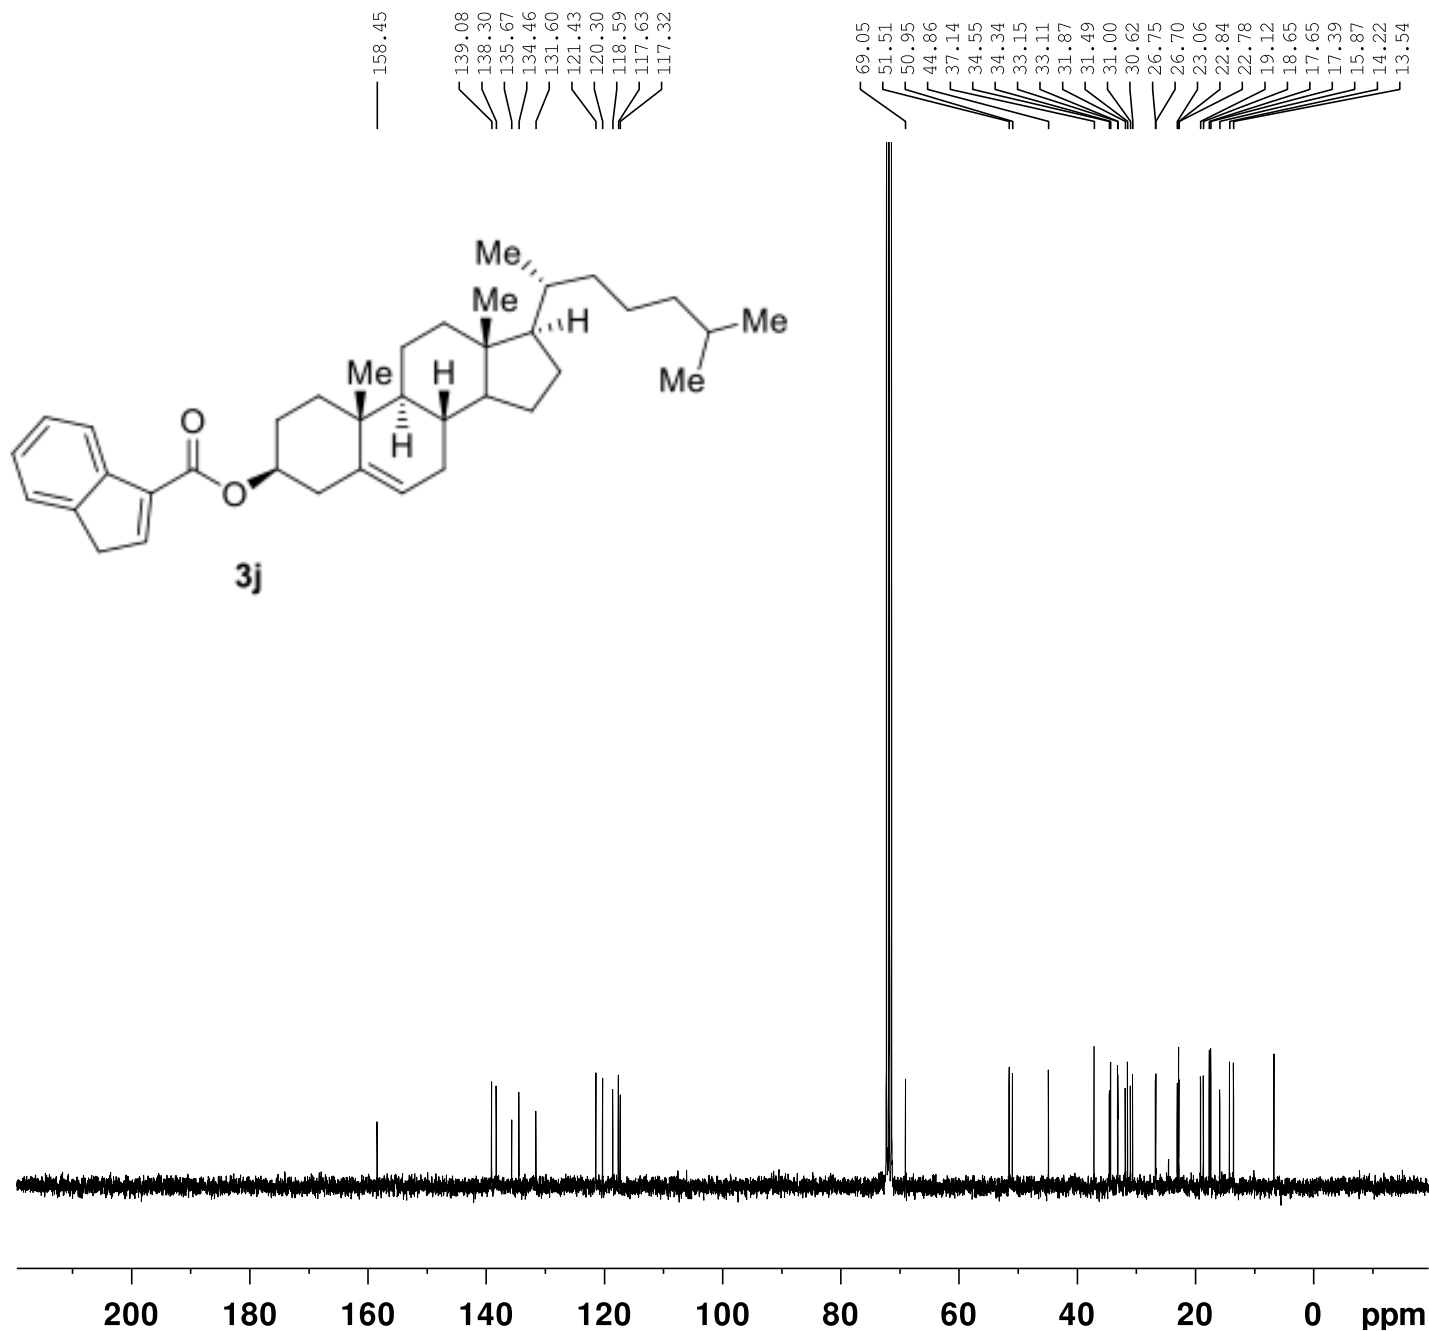

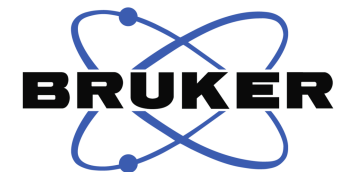

Current Data Parameters  
 NAME HNMR-YX-1-p46  
 EXPNO 373  
 PROCNO 1

F2 - Acquisition Parameters  
 Date\_ 20220708  
 Time 14.11  
 INSTRUM spect  
 PROBHD 5 mm PABBO BB-  
 PULPROG zg30  
 TD 65536  
 SOLVENT CDCl3  
 NS 16  
 DS 2  
 SWH 6009.615 Hz  
 FIDRES 0.091699 Hz  
 AQ 5.4525952 sec  
 RG 114  
 DW 83.200 usec  
 DE 6.50 usec  
 TE -59.1 K  
 D1 1.00000000 sec  
 TD0 1

===== CHANNEL f1 =====  
 SFO1 300.1318534 MHz  
 NUC1 1H  
 P1 10.00 usec  
 PLW1 14.00000000 W

F2 - Processing parameters  
 SI 65536  
 SF 300.1300315 MHz  
 WDW EM  
 SSB 0  
 LB 0.30 Hz  
 GB 0  
 PC 1.00

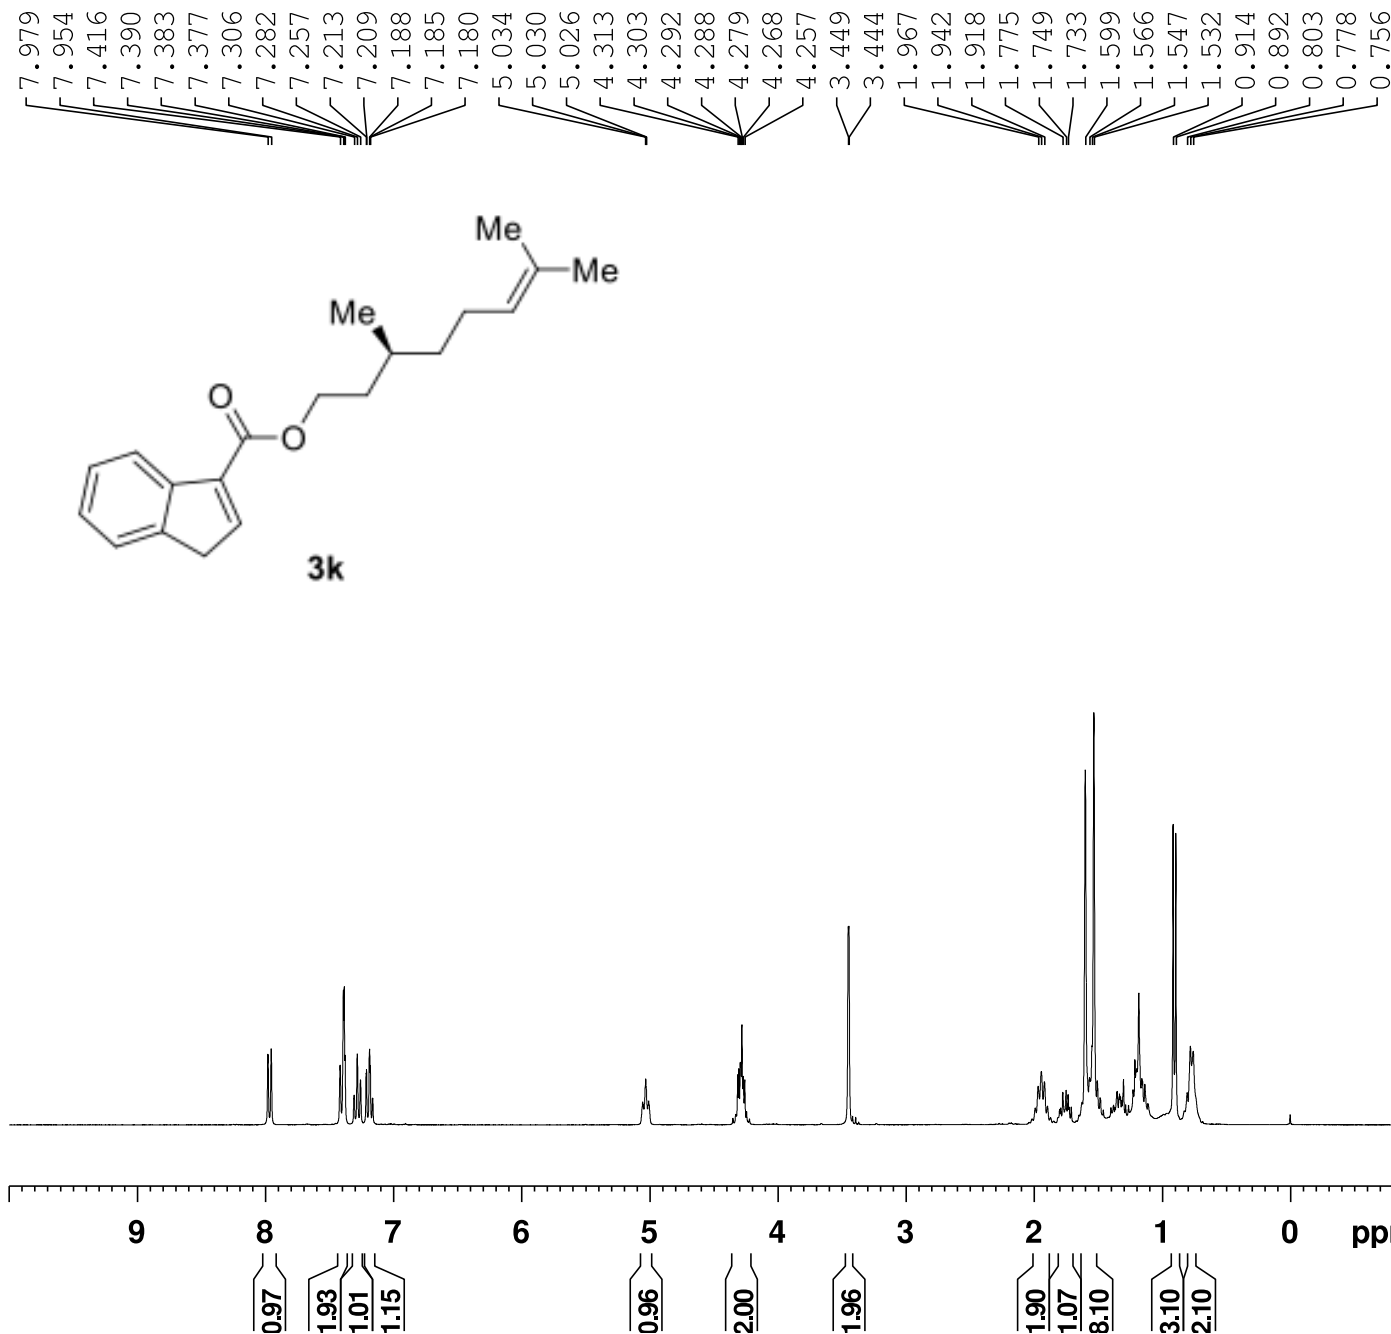



Current Data Parameters  
 NAME CNMR-YX-1-p46  
 EXPNO 388  
 PROCNO 1

F2 - Acquisition Parameters  
 Date\_ 20220709  
 Time 2.50  
 INSTRUM spect  
 PROBHD 5 mm PABBO BB-  
 PULPROG zgpg30  
 TD 65536  
 SOLVENT Acetone  
 NS 600  
 DS 4  
 SWH 18028.846 Hz  
 FIDRES 0.275098 Hz  
 AQ 1.8175317 sec  
 RG 203  
 DW 27.733 usec  
 DE 6.50 usec  
 TE -59.1 K  
 D1 2.00000000 sec  
 D11 0.03000000 sec  
 TD0 1

===== CHANNEL f1 =====  
 SFO1 75.4752949 MHz  
 NUC1 13C  
 P1 9.50 usec  
 PLW1 34.20000076 W

===== CHANNEL f2 =====  
 SFO2 300.1312005 MHz  
 NUC2 1H  
 CPDPRG[2] waltz16  
 PCPD2 90.00 usec  
 PLW2 14.00000000 W  
 PLW12 0.17284000 W  
 PLW13 0.14000000 W

F2 - Processing parameters  
 SI 32768  
 SF 75.4677485 MHz  
 WDW EM  
 SSB 0  
 LB 1.00 Hz  
 GB 0  
 PC 1.40

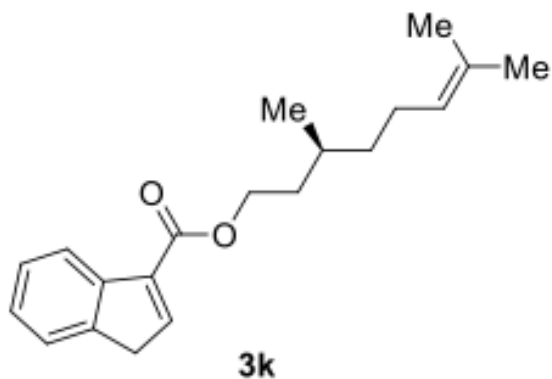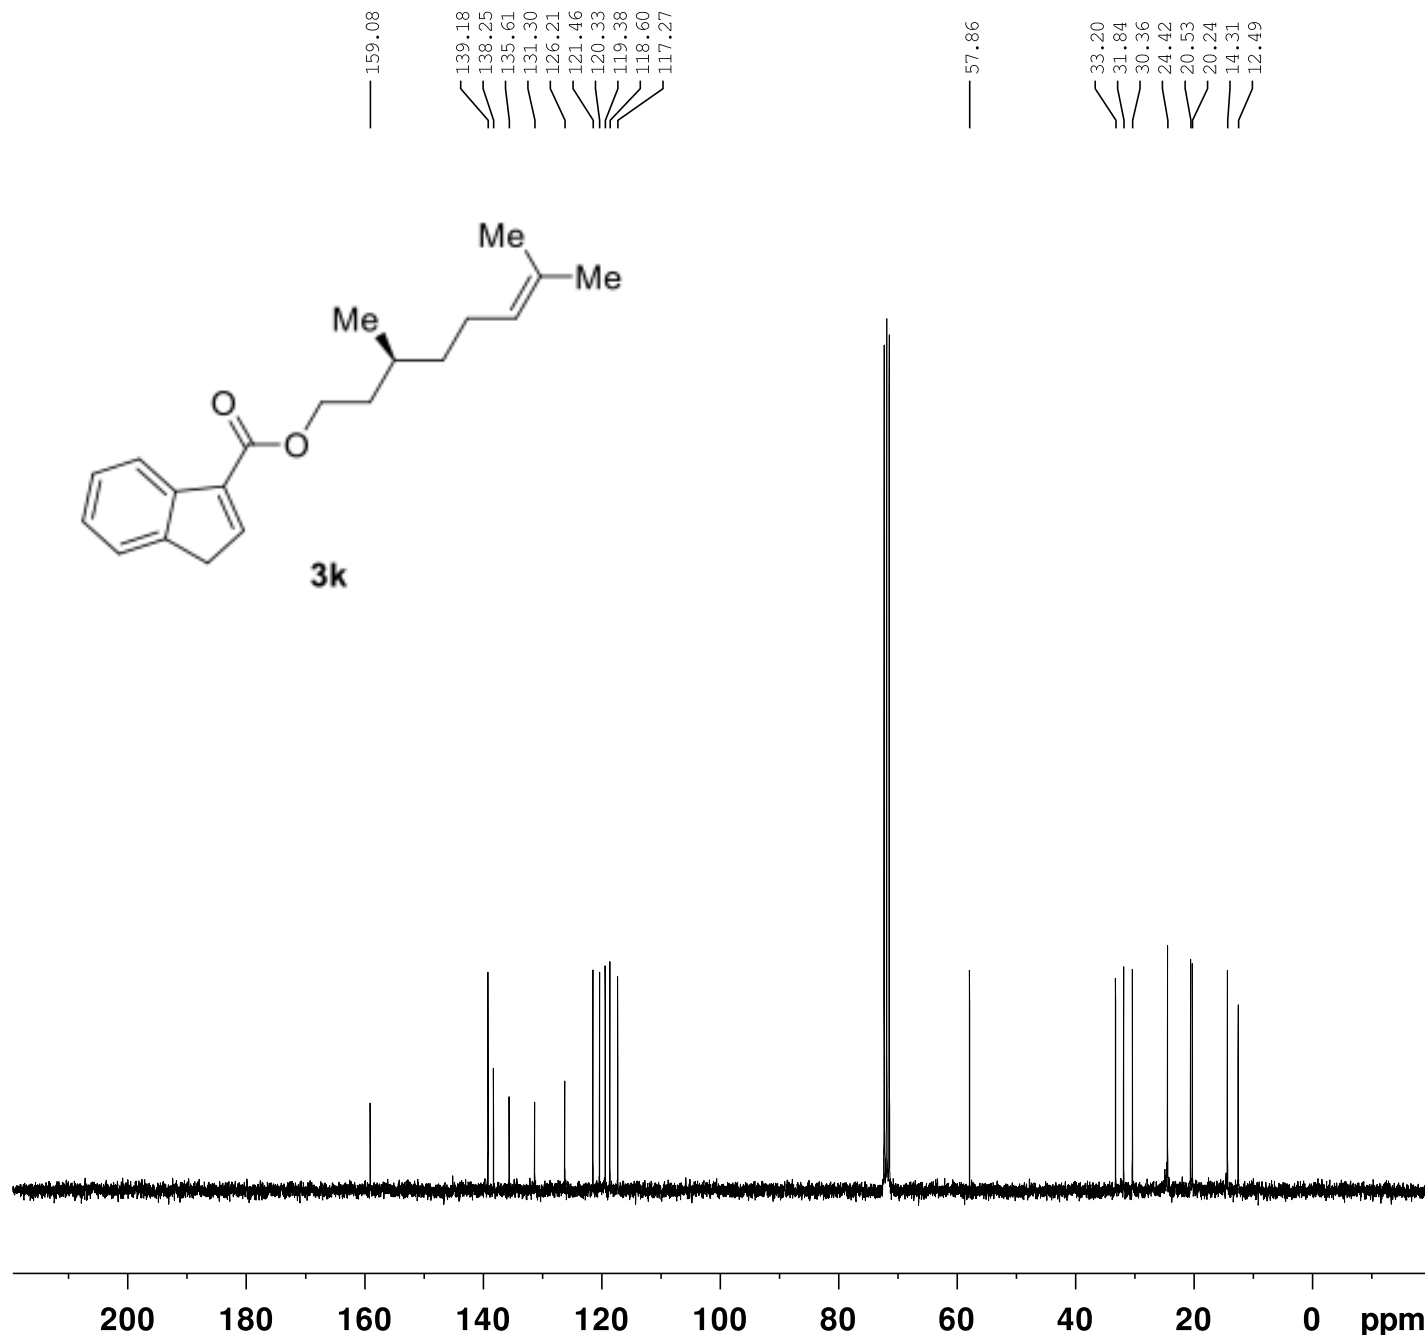



Current Data Parameters  
NAME HNMR-YX-3-p84  
EXPNO 1  
PROCNO 1

F2 - Acquisition Parameters  
Date\_ 20230329  
Time 3.04 h  
INSTRUM Avance  
PROBHD Z116098\_0833 (  
PULPROG zg30  
TD 65536  
SOLVENT CDCl3  
NS 16  
DS 2  
SWH 8196.722 Hz  
FIDRES 0.250144 Hz  
AQ 3.9976959 sec  
RG 81.1688  
DW 61.000 usec  
DE 13.54 usec  
TE 293.1 K  
D1 1.00000000 sec  
TD0 1  
SFO1 400.1324708 MHz  
NUC1 1H  
P0 3.33 usec  
P1 10.00 usec  
PLW1 20.73200035 W

F2 - Processing parameters  
SI 65536  
SF 400.1300098 MHz  
WDW EM  
SSB 0  
LB 0.30 Hz  
GB 0  
PC 1.00

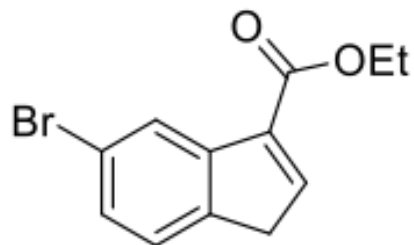

31

8.187  
8.183  
7.477  
7.472  
7.467  
7.383  
7.378  
7.363  
7.358  
7.320  
7.300  
7.260

4.401  
4.383  
4.366  
4.348  
3.470  
3.466

1.428  
1.410  
1.393

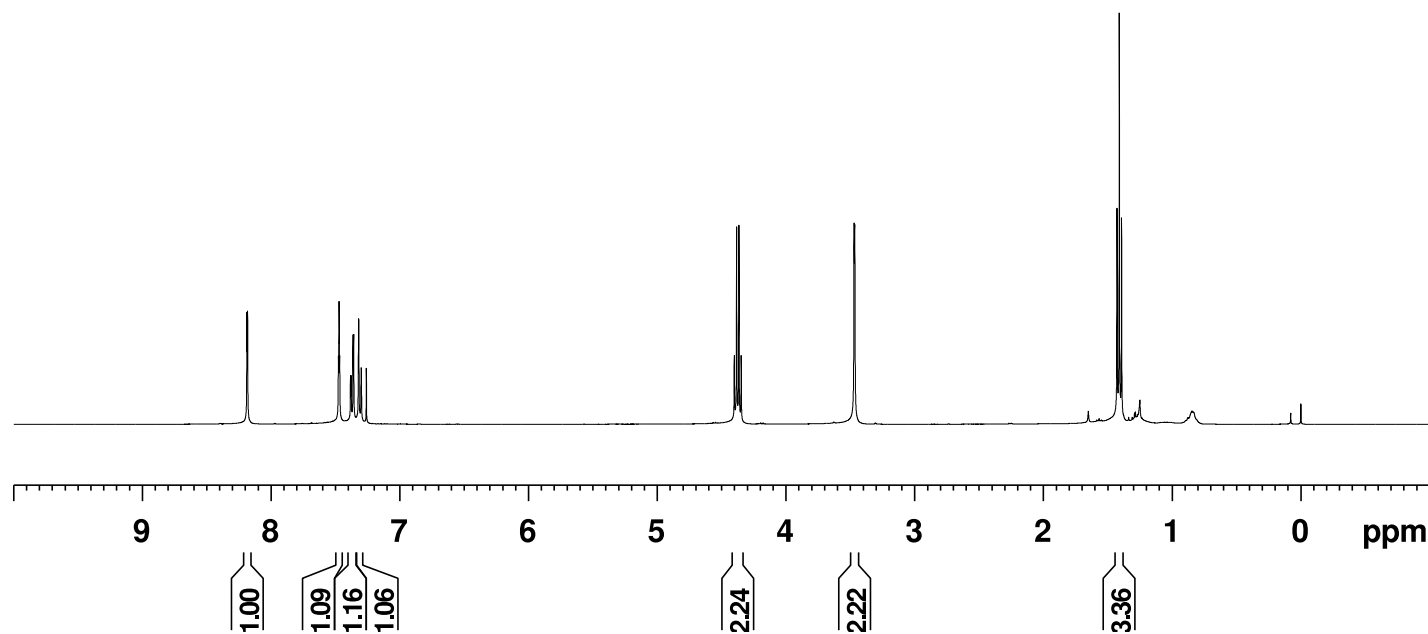



Current Data Parameters  
NAME CNMR-YX-3-p84  
EXPNO 2  
PROCNO 1

F2 - Acquisition Parameters  
Date\_ 20230329  
Time 3.28 h  
INSTRUM Avance  
PROBHD Z116098\_0833 (  
PULPROG zgpg30  
TD 65536  
SOLVENT CDCl3  
NS 400  
DS 4  
SWH 23809.523 Hz  
FIDRES 0.726609 Hz  
AQ 1.3762560 sec  
RG 50.1934  
DW 21.000 usec  
DE 6.50 usec  
TE 293.7 K  
D1 2.00000000 sec  
D11 0.03000000 sec  
TD0 1  
SFO1 100.6228298 MHz  
NUC1 13C  
P0 3.33 usec  
P1 10.00 usec  
PLW1 87.89900208 W  
SFO2 400.1316005 MHz  
NUC2 1H  
CPDPRG[2] waltz65  
PCPD2 90.00 usec  
PLW2 20.73200035 W  
PLW12 0.25595000 W  
PLW13 0.12874000 W

F2 - Processing parameters  
SI 32768  
SF 100.6127685 MHz  
WDW EM  
SSB 0  
LB 1.00 Hz  
GB 0  
PC 1.40

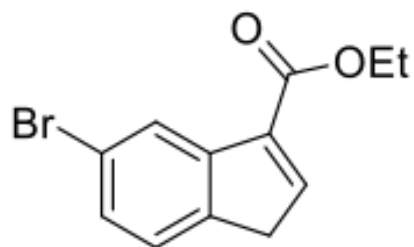

3l

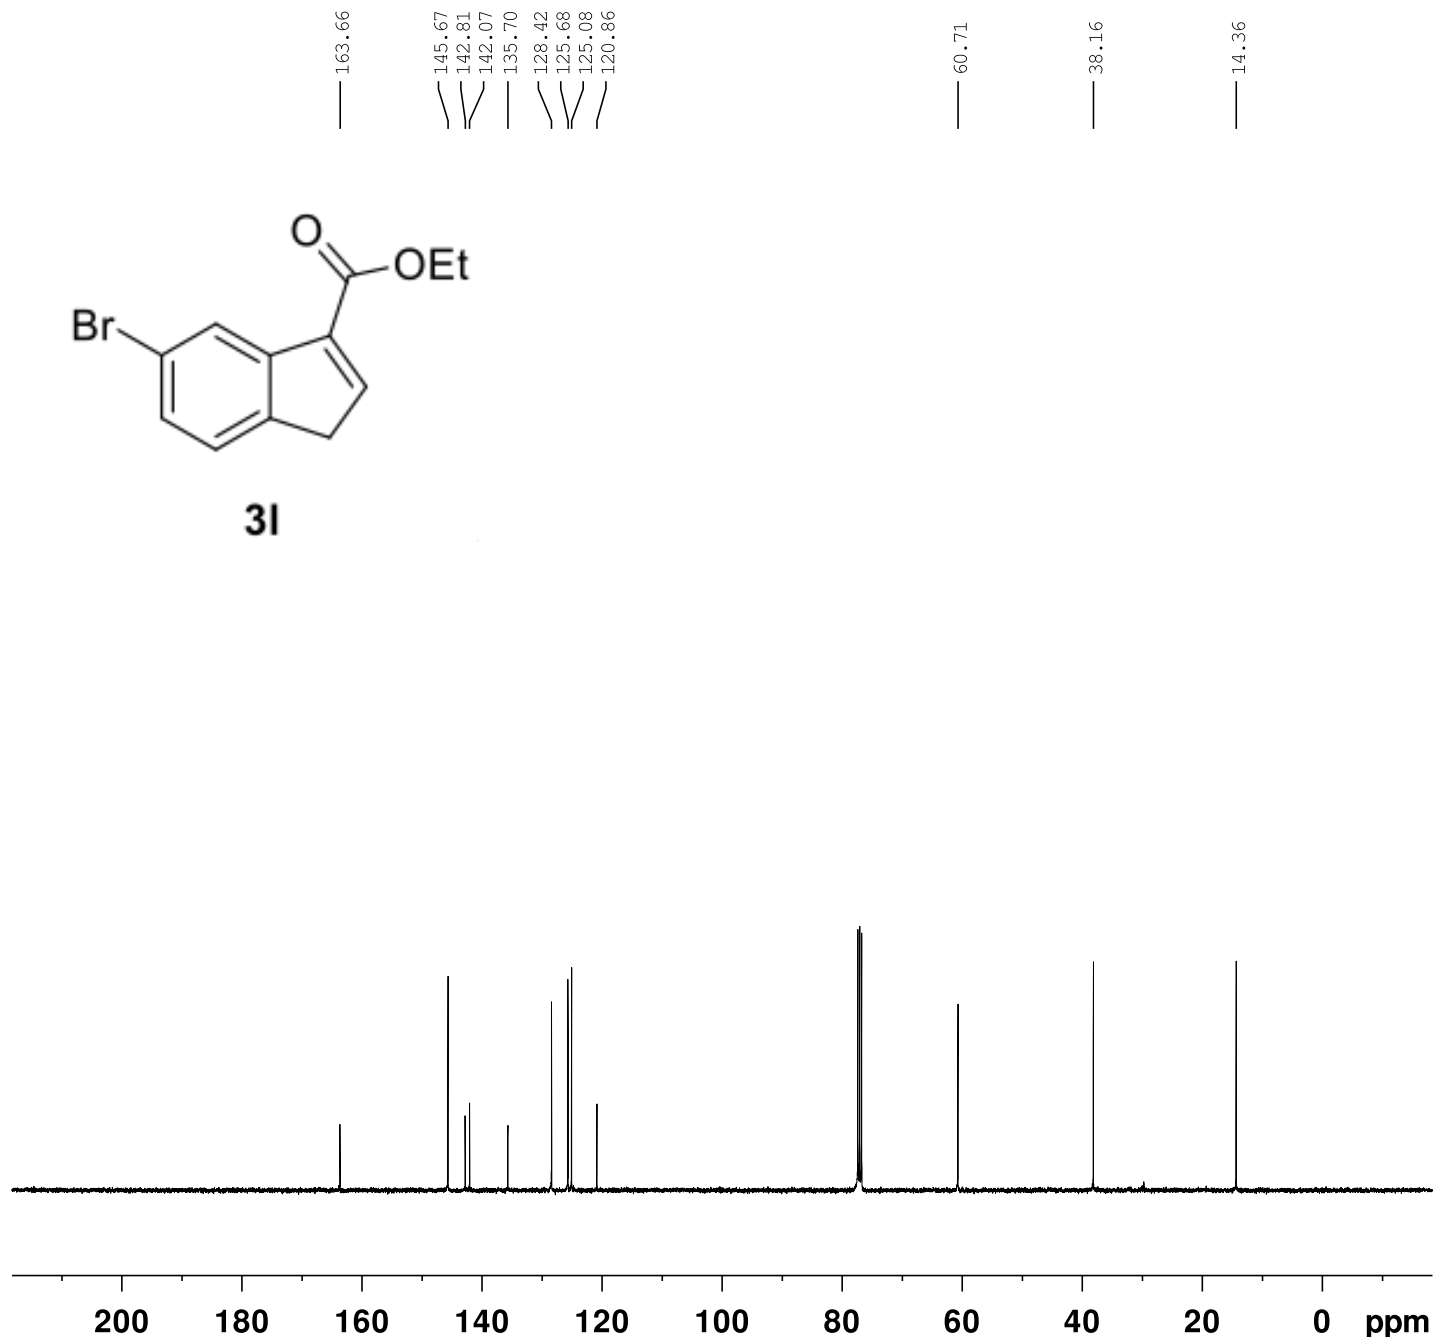

S45



Current Data Parameters  
 NAME HNMR-YX-3-p79  
 EXPNO 25  
 PROCNO 1

F2 - Acquisition Parameters  
 Date\_ 20230327  
 Time 14.07  
 INSTRUM spect  
 PROBHD 5 mm PABBO BB-  
 PULPROG zg30  
 TD 65536  
 SOLVENT CDCl3  
 NS 16  
 DS 2  
 SWH 6009.615 Hz  
 FIDRES 0.091699 Hz  
 AQ 5.4525952 sec  
 RG 144  
 DW 83.200 usec  
 DE 6.50 usec  
 TE 290.1 K  
 D1 1.00000000 sec  
 TD0 1

===== CHANNEL f1 =====  
 SFO1 300.1318534 MHz  
 NUC1 1H  
 P1 10.00 usec  
 PLW1 14.00000000 W

F2 - Processing parameters  
 SI 65536  
 SF 300.1300301 MHz  
 WDW EM  
 SSB 0  
 LB 0.30 Hz  
 GB 0  
 PC 1.00

7.678  
7.671  
7.646  
7.639  
7.451  
7.325  
7.308  
7.298  
7.281  
7.183  
6.912  
6.905  
6.882  
6.878  
6.854  
6.847

— 3.833  
— 3.416

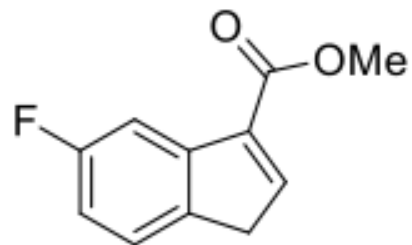

**3m**

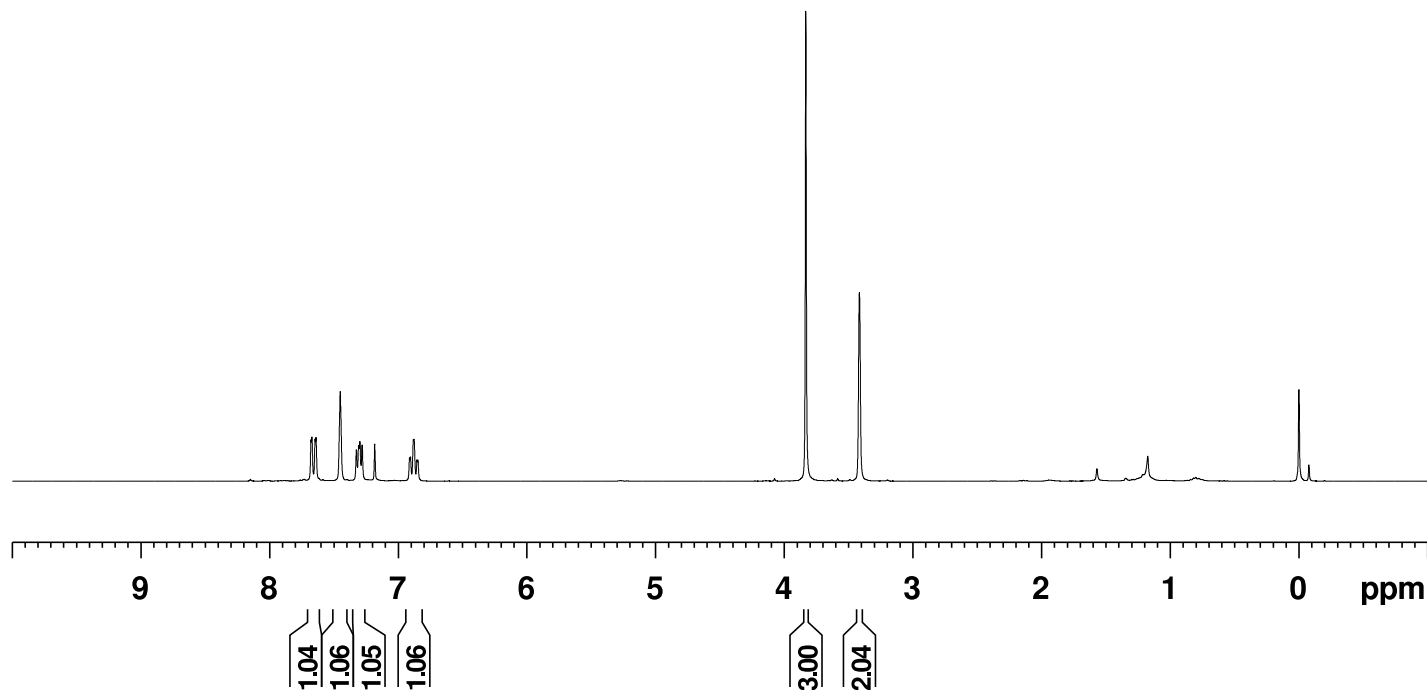



Current Data Parameters  
 NAME CNMR-YX-3-p79  
 EXPNO 1  
 PROCNO 1

F2 - Acquisition Parameters  
 Date\_ 20230329  
 Time 2.30 h  
 INSTRUM Avance  
 PROBHD Z116098\_0833 (   
 PULPROG zgpg30  
 TD 65536  
 SOLVENT CDCl3  
 NS 400  
 DS 4  
 SWH 23809.523 Hz  
 FIDRES 0.726609 Hz  
 AQ 1.3762560 sec  
 RG 50.1934  
 DW 21.000 usec  
 DE 6.50 usec  
 TE 293.6 K  
 D1 2.00000000 sec  
 D11 0.03000000 sec  
 TD0 1  
 SFO1 100.6228298 MHz  
 NUC1 13C  
 P0 3.33 usec  
 P1 10.00 usec  
 PLW1 87.89900208 W  
 SFO2 400.1316005 MHz  
 NUC2 1H  
 CPDPRG[2] waltz65  
 PCPD2 90.00 usec  
 PLW2 20.73200035 W  
 PLW12 0.25595000 W  
 PLW13 0.12874000 W

F2 - Processing parameters  
 SI 32768  
 SF 100.6128746 MHz  
 WDW EM  
 SSB 0  
 LB 1.00 Hz  
 GB 0  
 PC 1.40

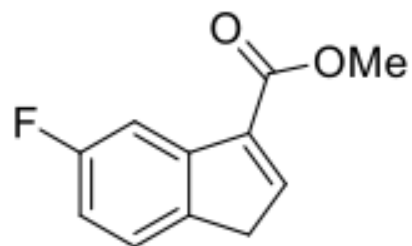

3m

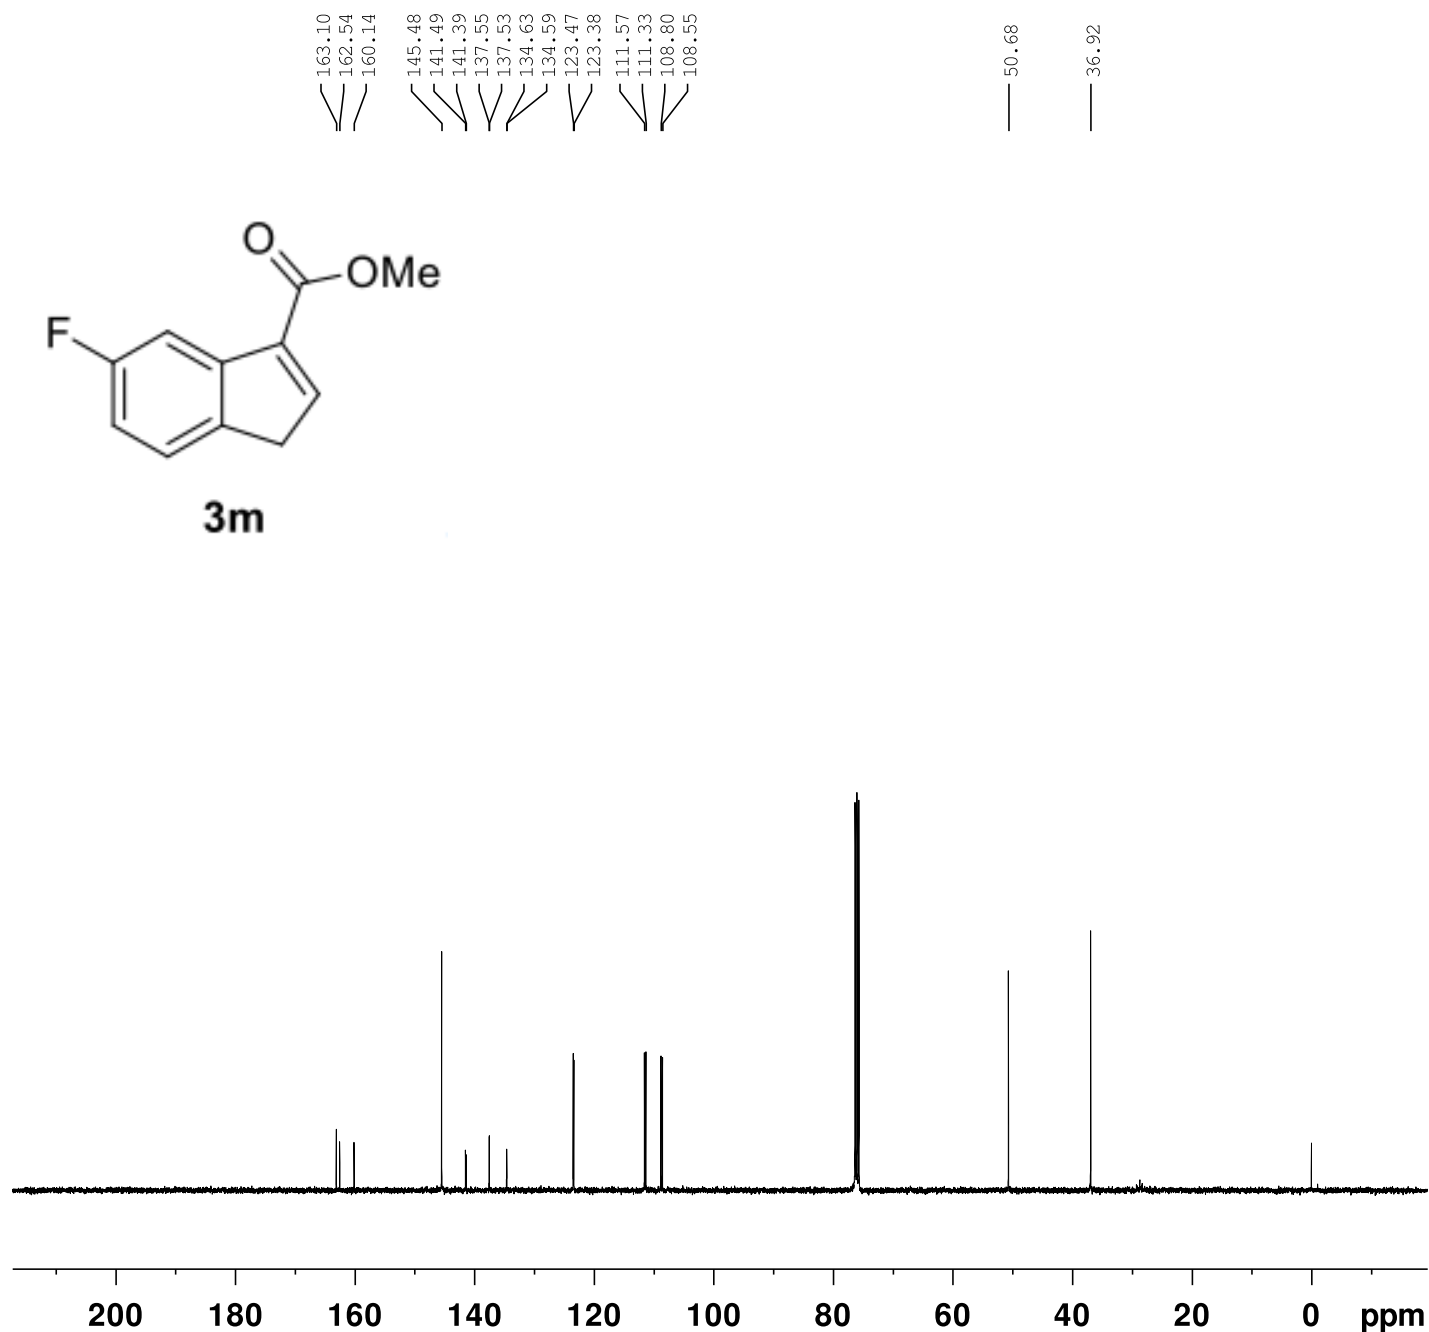

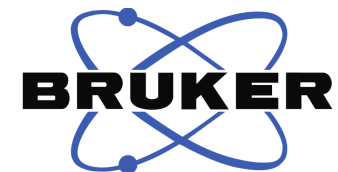

Current Data Parameters  
NAME FNMN-YX-3-p79  
EXPNO 2  
PROCNO 1

F2 - Acquisition Parameters  
Date\_ 20230324  
Time 22.03 h  
INSTRUM Avance  
PROBHD Z116098\_0833 (  
PULPROG zgig  
TD 131072  
SOLVENT CDCl3  
NS 16  
DS 4  
SWH 90909.094 Hz  
FIDRES 1.387163 Hz  
AQ 0.7208960 sec  
RG 101  
DW 5.500 usec  
DE 6.50 usec  
TE 293.1 K  
D1 1.00000000 sec  
D11 0.03000000 sec  
TD0 1  
SFO1 376.4607164 MHz  
NUC1 19F  
P1 18.00 usec  
PLW1 16.73100090 W  
SFO2 400.1316005 MHz  
NUC2 1H  
CPDPRG[2] waltz16  
PCPD2 90.00 usec  
PLW2 20.73200035 W  
PLW12 0.25595000 W

F2 - Processing parameters  
SI 65536  
SF 376.4983662 MHz  
WDW EM  
SSB 0  
LB 0.30 Hz  
GB 0  
PC 1.00



3m

— -116.37

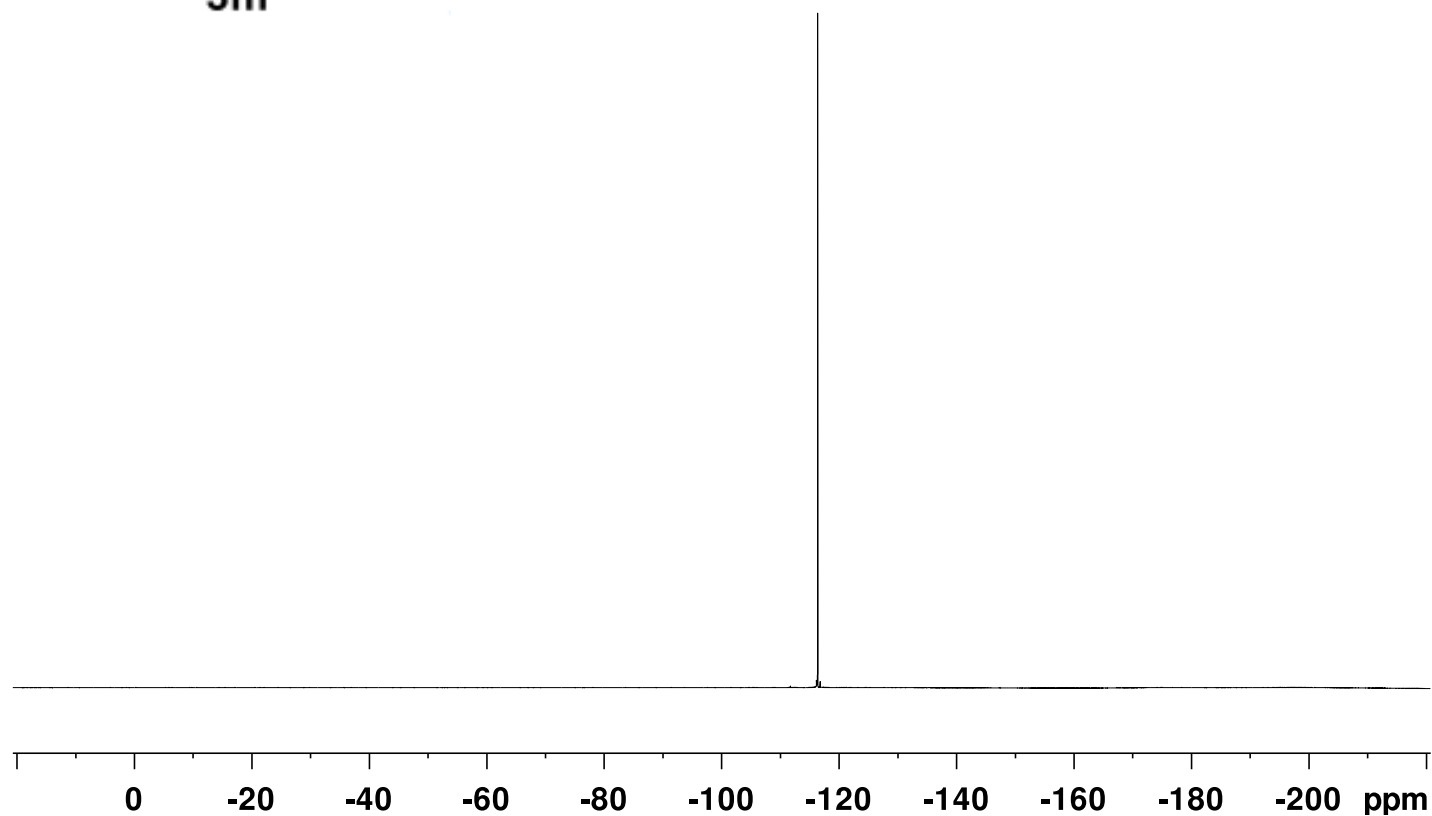



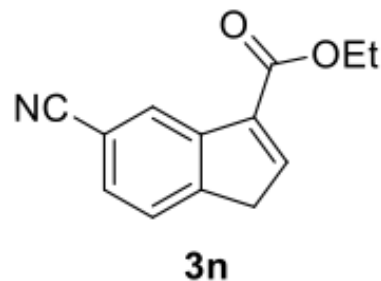

8.334  
7.582  
7.561  
7.278

4.429  
4.411  
4.393  
4.375  
3.624  
3.620

1.446  
1.428  
1.410



Current Data Parameters  
NAME HNMR-YX-3-p95  
EXPNO 1  
PROCNO 1

F2 - Acquisition Parameters  
Date\_ 20230331  
Time 21.38 h  
INSTRUM Avance  
PROBHD Z116098\_0833 (  
PULPROG zg30  
TD 65536  
SOLVENT CDCl3  
NS 16  
DS 2  
SWH 8196.722 Hz  
FIDRES 0.250144 Hz  
AQ 3.9976959 sec  
RG 95.2744  
DW 61.000 usec  
DE 13.54 usec  
TE 293.4 K  
D1 1.00000000 sec  
TD0 1  
SFO1 400.1324708 MHz  
NUC1 1H  
P0 3.33 usec  
P1 10.00 usec  
PLW1 20.73200035 W

F2 - Processing parameters  
SI 65536  
SF 400.1300030 MHz  
WDW EM  
SSB 0  
LB 0.30 Hz  
GB 0  
PC 1.00

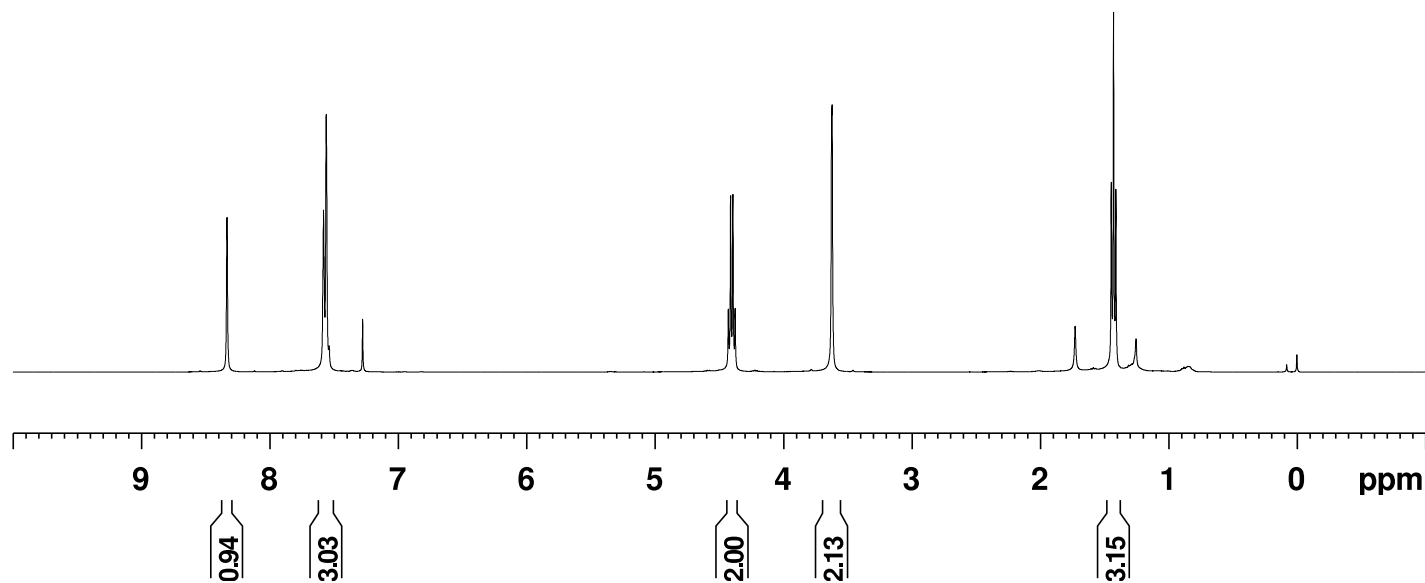



Current Data Parameters  
NAME CNMR-YX-3-p95  
EXPNO 2  
PROCNO 1

F2 - Acquisition Parameters  
Date\_ 20230401  
Time 8.21 h  
INSTRUM Avance  
PROBHD Z116098\_0833 (  
PULPROG zgpg30  
TD 65536  
SOLVENT CDCl3  
NS 400  
DS 4  
SWH 23809.523 Hz  
FIDRES 0.726609 Hz  
AQ 1.3762560 sec  
RG 51.55  
DW 21.000 usec  
DE 6.50 usec  
TE 294.0 K  
D1 2.00000000 sec  
D11 0.03000000 sec  
TD0 1  
SFO1 100.6228298 MHz  
NUC1 13C  
P0 3.33 usec  
P1 10.00 usec  
PLW1 87.89900208 W  
SFO2 400.1316005 MHz  
NUC2 1H  
CPDPRG[2] waltz65  
PCPD2 90.00 usec  
PLW2 20.73200035 W  
PLW12 0.25595000 W  
PLW13 0.12874000 W

F2 - Processing parameters  
SI 32768  
SF 100.6127685 MHz  
WDW EM  
SSB 0  
LB 1.00 Hz  
GB 0  
PC 1.40

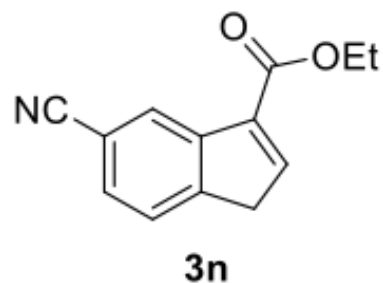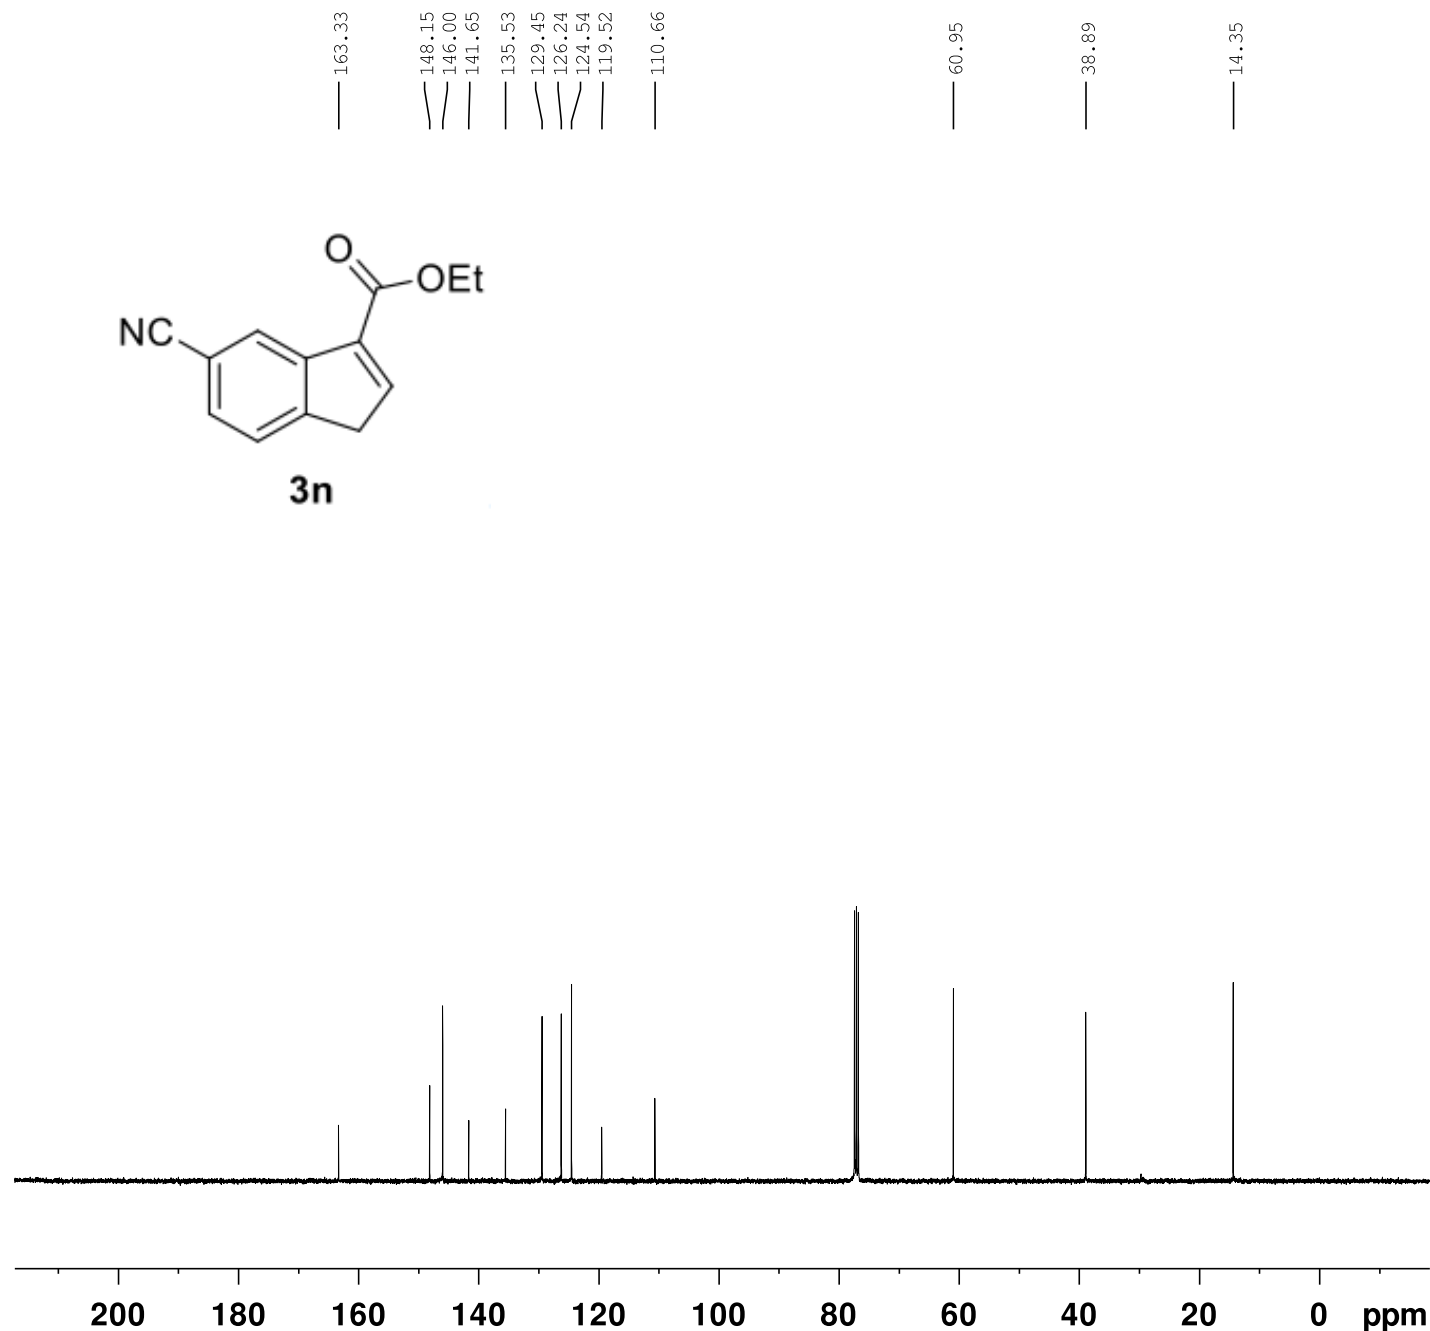



Current Data Parameters  
 NAME HNMR-YX-4-p5  
 EXPNO 80  
 PROCNO 1

F2 - Acquisition Parameters  
 Date\_ 20230404  
 Time 13.07  
 INSTRUM spect  
 PROBHD 5 mm PABBO BB-  
 PULPROG zg30  
 TD 65536  
 SOLVENT CDCl3  
 NS 16  
 DS 2  
 SWH 6009.615 Hz  
 FIDRES 0.091699 Hz  
 AQ 5.4525952 sec  
 RG 114  
 DW 83.200 usec  
 DE 6.50 usec  
 TE 291.5 K  
 D1 1.00000000 sec  
 TD0 1

===== CHANNEL f1 =====  
 SFO1 300.1318534 MHz  
 NUC1 1H  
 P1 10.00 usec  
 PLW1 14.00000000 W

F2 - Processing parameters  
 SI 65536  
 SF 300.130015 MHz  
 WDW EM  
 SSB 0  
 LB 0.30 Hz  
 GB 0  
 PC 1.00

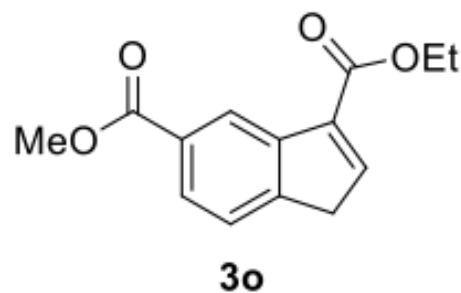

8.677  
 7.990  
 7.964  
 7.529  
 7.504  
 7.277

4.436  
 4.412  
 4.389  
 4.365  
 3.937  
 3.565

1.454  
 1.430  
 1.407

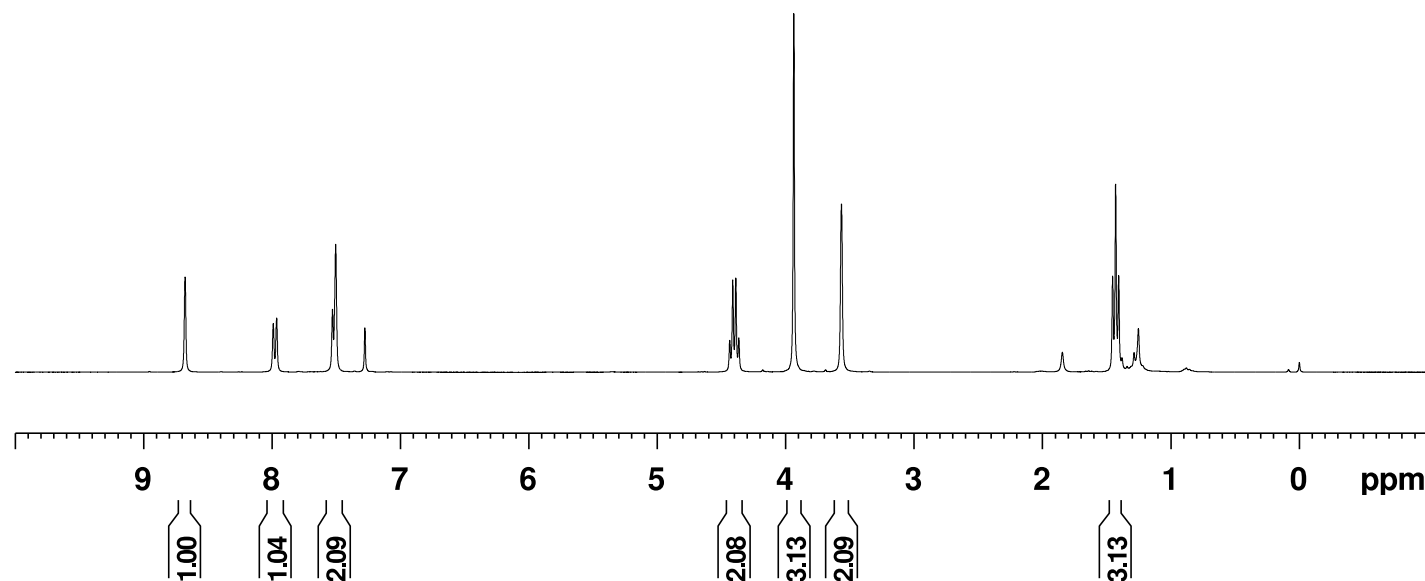



Current Data Parameters  
NAME CNMR-YX-4-p5  
EXPNO 81  
PROCNO 1

F2 - Acquisition Parameters

Date\_ 20230404  
Time 13.22  
INSTRUM spect  
PROBHD 5 mm PABBO BB-  
PULPROG zgpg30  
TD 65536  
SOLVENT CDCl3  
NS 200  
DS 4  
SWH 18028.846 Hz  
FIDRES 0.275098 Hz  
AQ 1.8175317 sec  
RG 203  
DW 27.733 usec  
DE 6.50 usec  
TE 292.1 K  
D1 2.00000000 sec  
D11 0.03000000 sec  
TD0 1

===== CHANNEL f1 =====

SFO1 75.4752949 MHz  
NUC1 13C  
P1 9.50 usec  
PLW1 34.20000076 W

===== CHANNEL f2 =====

SFO2 300.1312005 MHz  
NUC2 1H  
CPDPRG[2] waltz16  
PCPD2 90.00 usec  
PLW2 14.00000000 W  
PLW12 0.17284000 W  
PLW13 0.14000000 W

F2 - Processing parameters

SI 32768  
SF 75.4677485 MHz  
WDW EM  
SSB 0  
LB 1.00 Hz  
GB 0  
PC 1.40

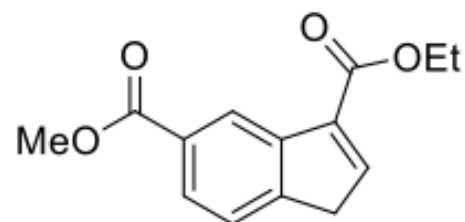

3o

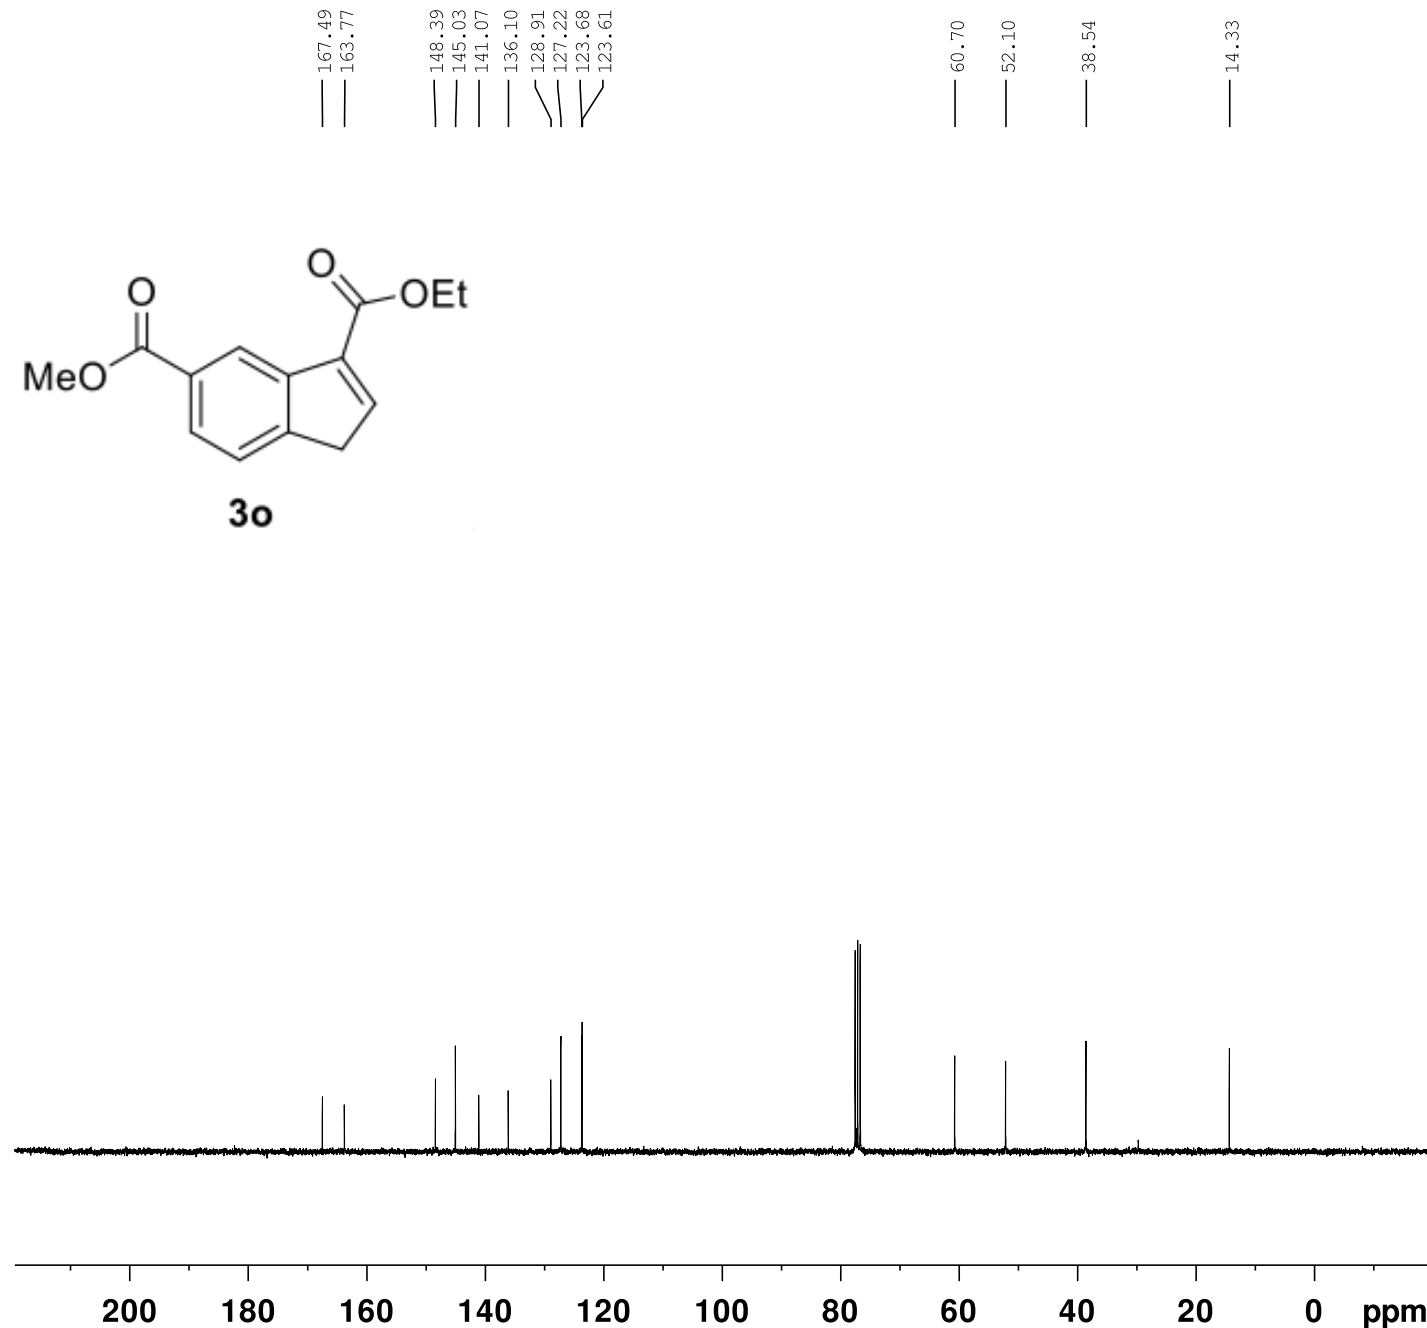

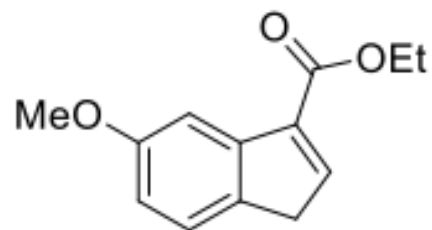

**3p**

7.647  
7.640  
7.478  
7.352  
7.325  
6.843  
6.836  
6.816  
6.809

4.402  
4.378  
4.354  
4.331  
3.859  
3.449

1.431  
1.407  
1.383



Current Data Parameters  
NAME HNMR-YX-3-p85  
EXPNO 54  
PROCNO 1

F2 - Acquisition Parameters  
Date\_ 20230331  
Time 16.48  
INSTRUM spect  
PROBHD 5 mm PABBO BB-  
PULPROG zg30  
TD 65536  
SOLVENT CDCl3  
NS 16  
DS 2  
SWH 6009.615 Hz  
FIDRES 0.091699 Hz  
AQ 5.4525952 sec  
RG 114  
DW 83.200 usec  
DE 6.50 usec  
TE 289.9 K  
D1 1.00000000 sec  
TD0 1

===== CHANNEL f1 =====  
SFO1 300.1318534 MHz  
NUC1 1H  
P1 10.00 usec  
PLW1 14.00000000 W

F2 - Processing parameters  
SI 65536  
SF 300.130087 MHz  
WDW EM  
SSB 0  
LB 0.30 Hz  
GB 0  
PC 1.00

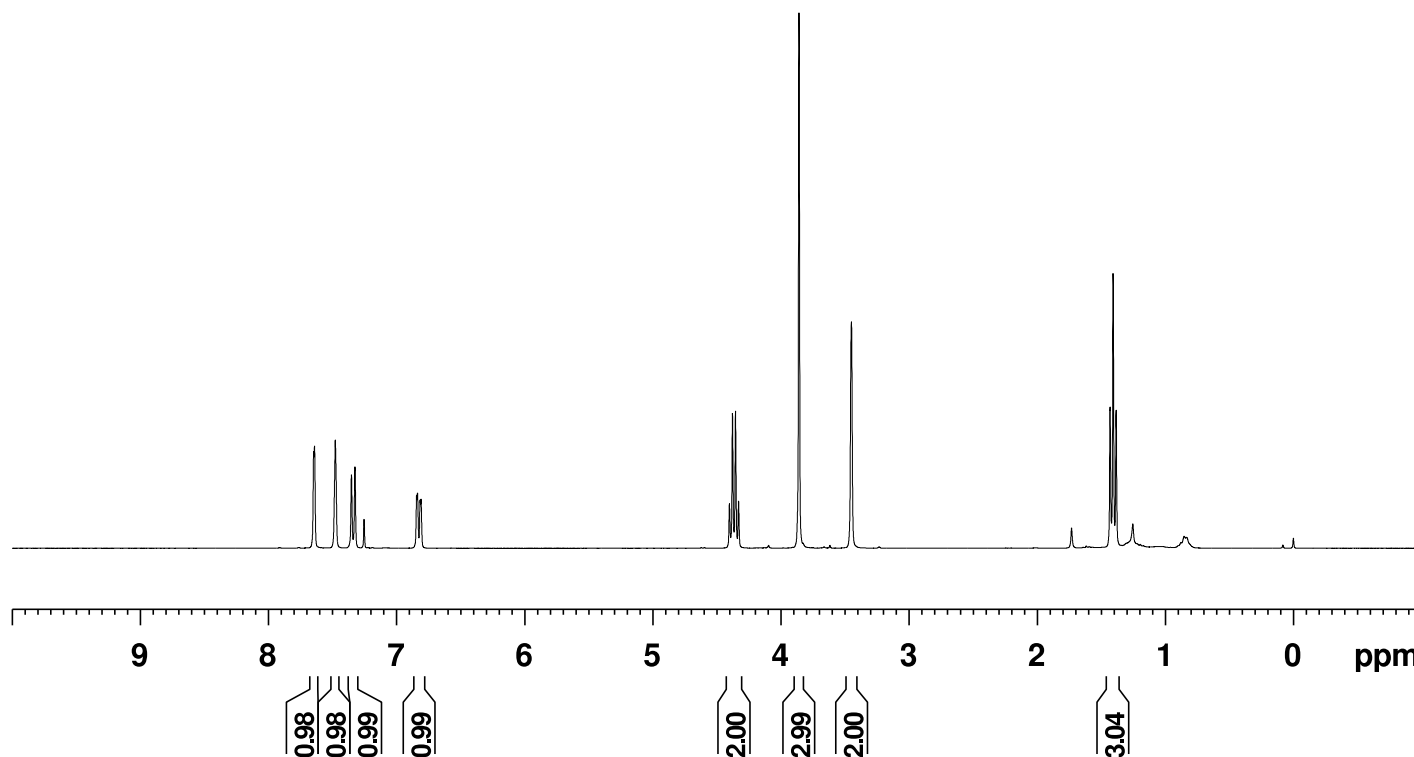



Current Data Parameters  
 NAME CNMR-YX-3-p85  
 EXPNO 55  
 PROCNO 1

F2 - Acquisition Parameters  
 Date\_ 20230331  
 Time 17.06  
 INSTRUM spect  
 PROBHD 5 mm PABBO BB-  
 PULPROG zgpg30  
 TD 65536  
 SOLVENT CDCl3  
 NS 250  
 DS 4  
 SWH 18028.846 Hz  
 FIDRES 0.275098 Hz  
 AQ 1.8175317 sec  
 RG 203  
 DW 27.733 usec  
 DE 6.50 usec  
 TE 290.5 K  
 D1 2.00000000 sec  
 D11 0.03000000 sec  
 TD0 1

===== CHANNEL f1 =====  
 SFO1 75.4752949 MHz  
 NUC1 13C  
 P1 9.50 usec  
 PLW1 34.20000076 W

===== CHANNEL f2 =====  
 SFO2 300.1312005 MHz  
 NUC2 1H  
 CPDPRG[2] waltz16  
 PCPD2 90.00 usec  
 PLW2 14.00000000 W  
 PLW12 0.17284000 W  
 PLW13 0.14000000 W

F2 - Processing parameters  
 SI 32768  
 SF 75.4677485 MHz  
 WDW EM  
 SSB 0  
 LB 1.00 Hz  
 GB 0  
 PC 1.40

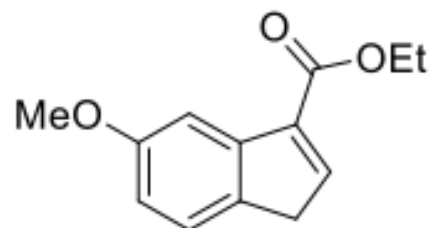

3p

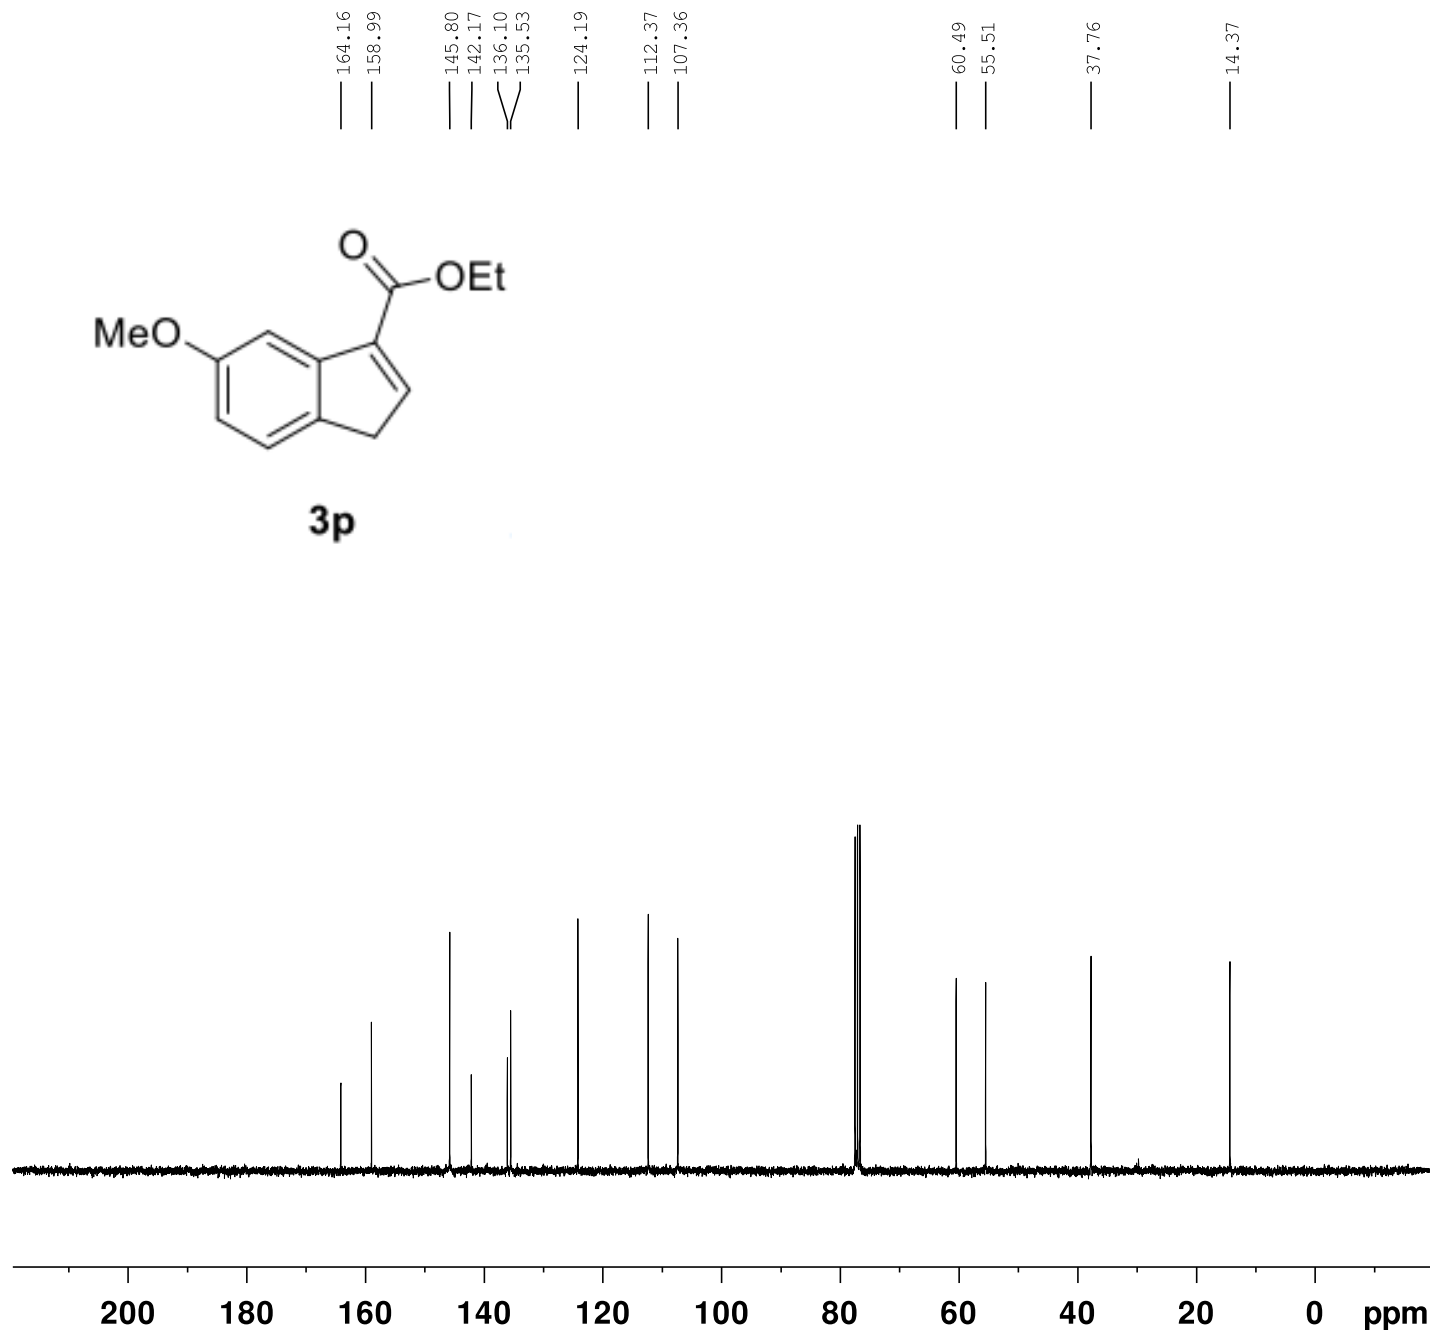



Current Data Parameters  
NAME HNMR-YX-1-p75  
EXPNO 460  
PROCNO 1

F2 - Acquisition Parameters  
Date\_ 20220721  
Time 13.49  
INSTRUM spect  
PROBHD 5 mm PABBO BB-  
PULPROG zg30  
TD 65536  
SOLVENT CDCl3  
NS 16  
DS 2  
SWH 6009.615 Hz  
FIDRES 0.091699 Hz  
AQ 5.4525952 sec  
RG 181  
DW 83.200 usec  
DE 6.50 usec  
TE -59.1 K  
D1 1.00000000 sec  
TD0 1

===== CHANNEL f1 =====  
SFO1 300.1318534 MHz  
NUC1 1H  
P1 10.00 usec  
PLW1 14.00000000 W

F2 - Processing parameters  
SI 65536  
SF 300.130094 MHz  
WDW EM  
SSB 0  
LB 0.30 Hz  
GB 0  
PC 1.00

7.673  
7.649  
7.553  
7.527  
7.517  
7.511  
7.504  
7.491  
7.485  
7.473  
7.468  
7.450  
7.424  
7.369  
7.365  
7.351  
7.344  
7.320  
7.253  
4.429  
4.405  
4.381  
4.358  
3.572  
3.567

1.443  
1.420  
1.396

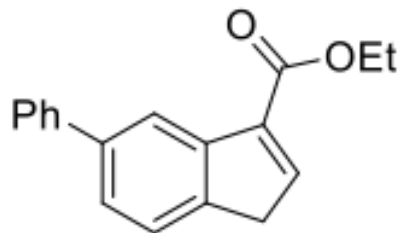

**3q**

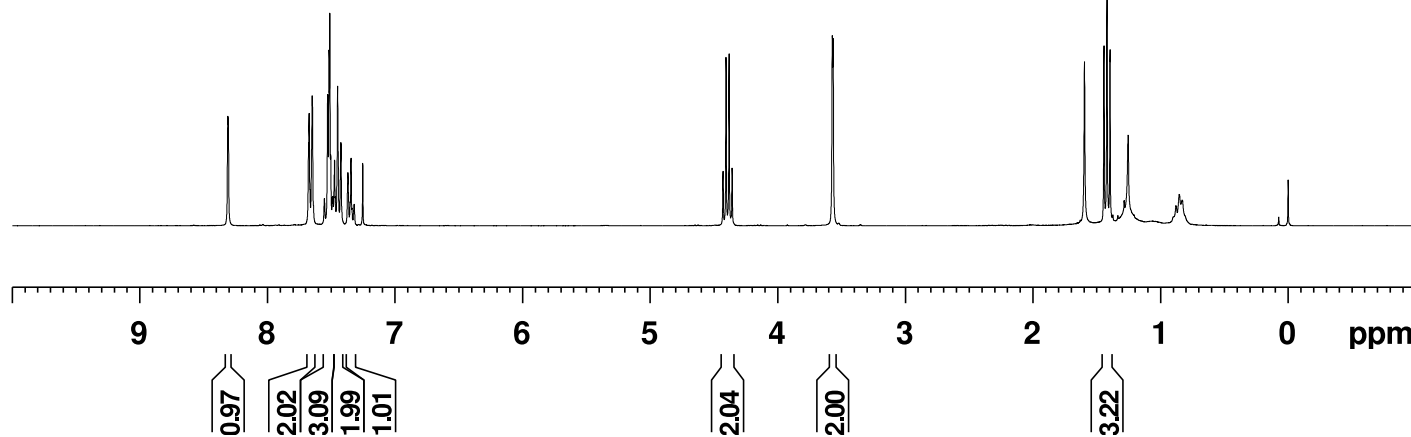



Current Data Parameters  
 NAME CNMR-YX-1-p75  
 EXPNO 469  
 PROCNO 1

F2 - Acquisition Parameters  
 Date\_ 20220721  
 Time 23.00  
 INSTRUM spect  
 PROBHD 5 mm PABBO BB-  
 PULPROG zgpg30  
 TD 65536  
 SOLVENT CDCl3  
 NS 200  
 DS 4  
 SWH 18028.846 Hz  
 FIDRES 0.275098 Hz  
 AQ 1.8175317 sec  
 RG 203  
 DW 27.733 usec  
 DE 6.50 usec  
 TE -59.1 K  
 D1 2.00000000 sec  
 D11 0.03000000 sec  
 TD0 1

===== CHANNEL f1 =====  
 SFO1 75.4752949 MHz  
 NUC1 13C  
 P1 9.50 usec  
 PLW1 34.20000076 W

===== CHANNEL f2 =====  
 SFO2 300.1312005 MHz  
 NUC2 1H  
 CPDPRG[2] waltz16  
 PCPD2 90.00 usec  
 PLW2 14.00000000 W  
 PLW12 0.17284000 W  
 PLW13 0.14000000 W

F2 - Processing parameters  
 SI 32768  
 SF 75.4677485 MHz  
 WDW EM  
 SSB 0  
 LB 1.00 Hz  
 GB 0  
 PC 1.40

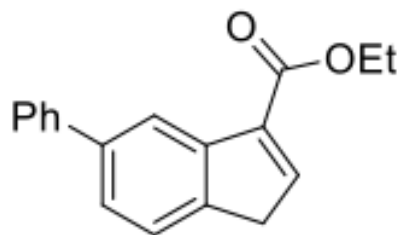

**3q**

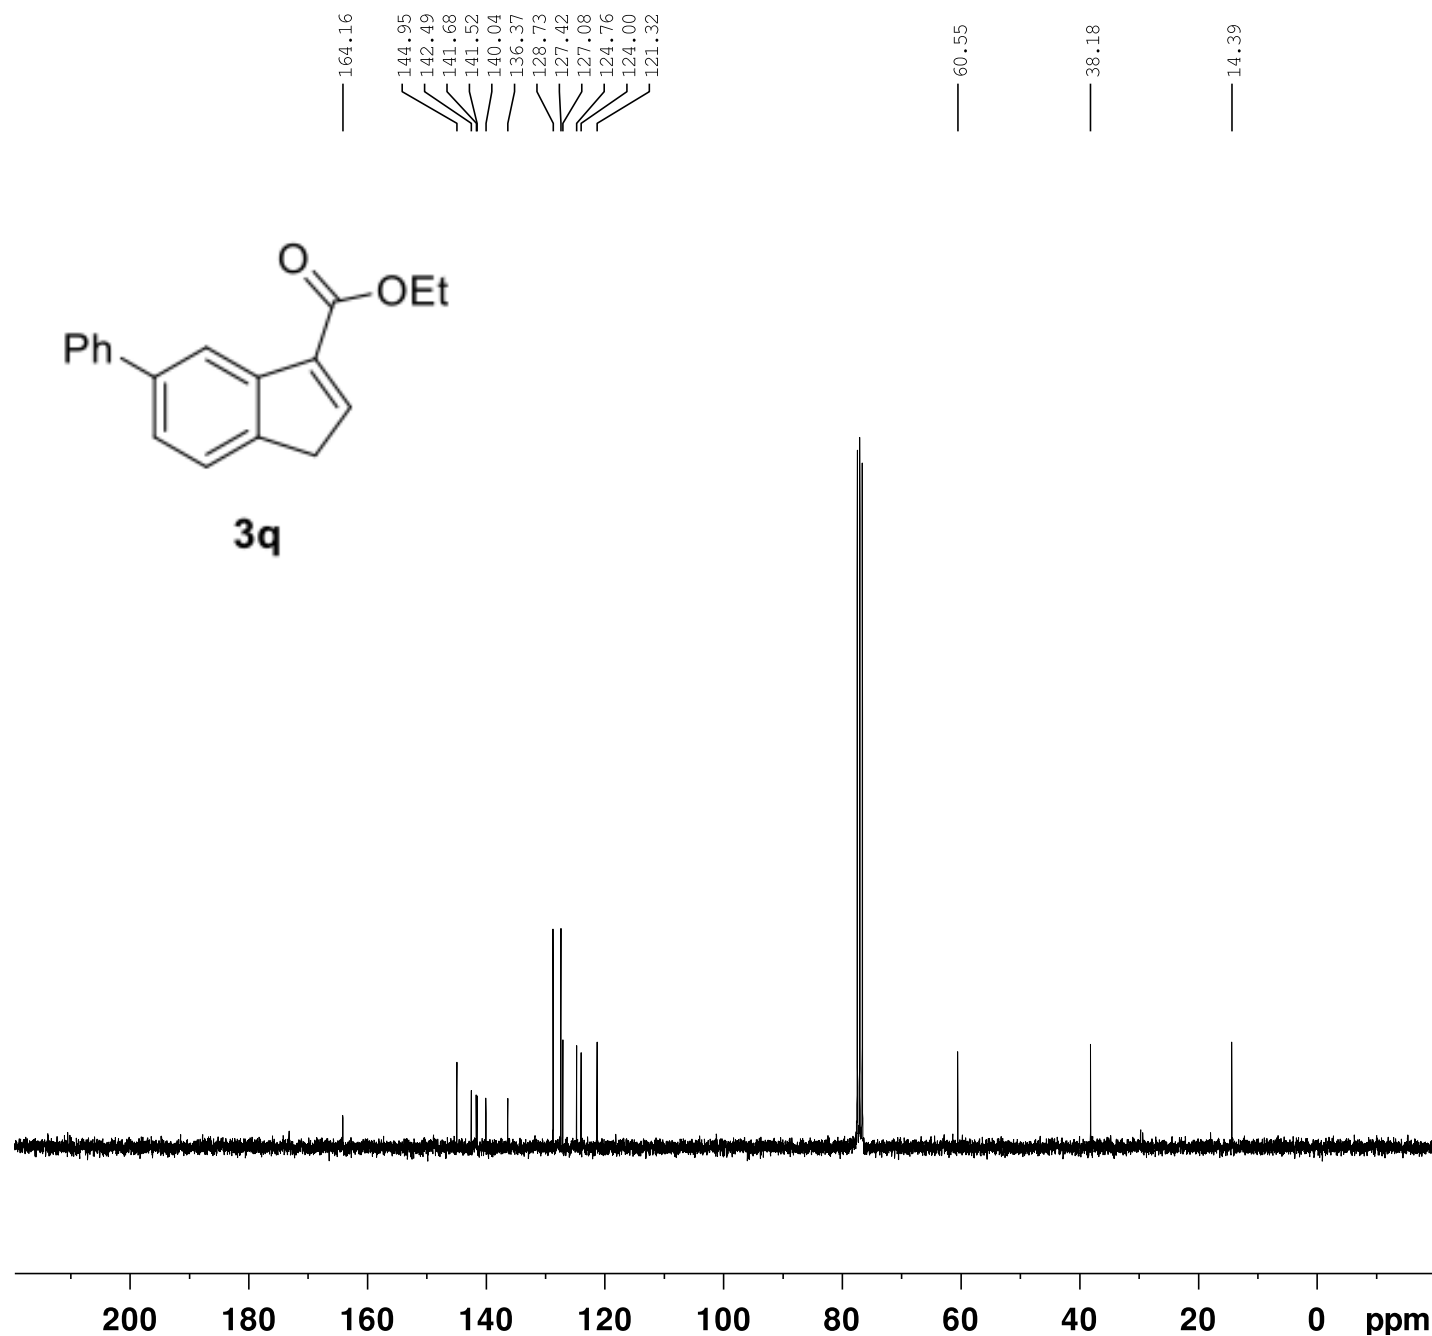



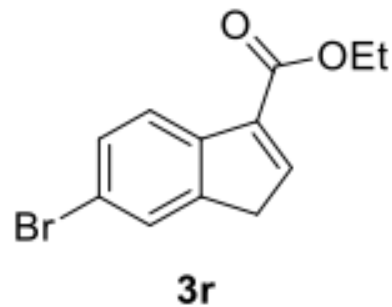

7.911  
7.884  
7.596  
7.490  
7.462  
7.429  
7.262

4.403  
4.379  
4.355  
4.332  
— 3.497

1.428  
1.405  
1.381



Current Data Parameters  
NAME HNMR-YX-3-p89  
EXPNO 56  
PROCNO 1

F2 - Acquisition Parameters  
Date\_ 20230331  
Time 21.39  
INSTRUM spect  
PROBHD 5 mm PABBO BB-  
PULPROG zg30  
TD 65536  
SOLVENT CDCl3  
NS 16  
DS 2  
SWH 6009.615 Hz  
FIDRES 0.091699 Hz  
AQ 5.4525952 sec  
RG 181  
DW 83.200 usec  
DE 6.50 usec  
TE 291.0 K  
D1 1.00000000 sec  
TD0 1

===== CHANNEL f1 =====  
SFO1 300.1318534 MHz  
NUC1 1H  
P1 10.00 usec  
PLW1 14.00000000 W

F2 - Processing parameters  
SI 65536  
SF 300.130063 MHz  
WDW EM  
SSB 0  
LB 0.30 Hz  
GB 0  
PC 1.00

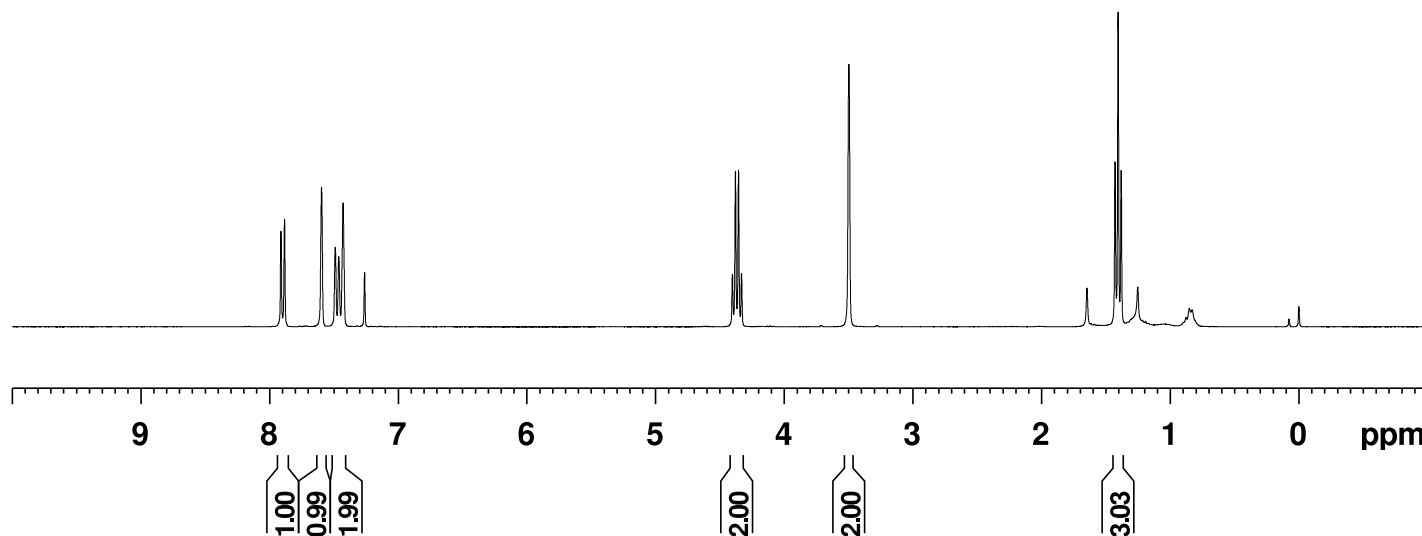

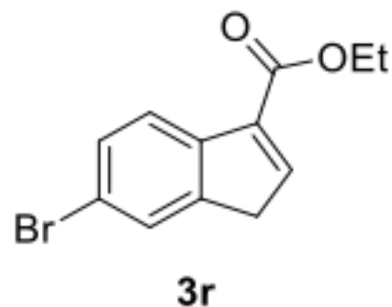

Current Data Parameters  
 NAME CNMR-YX-3-p89  
 EXPNO 57  
 PROCNO 1

F2 - Acquisition Parameters  
 Date\_ 20230331  
 Time 22.54  
 INSTRUM spect  
 PROBHD 5 mm PABBO BB-  
 PULPROG zgpg30  
 TD 65536  
 SOLVENT CDCl3  
 NS 250  
 DS 4  
 SWH 18028.846 Hz  
 FIDRES 0.275098 Hz  
 AQ 1.8175317 sec  
 RG 203  
 DW 27.733 usec  
 DE 6.50 usec  
 TE 291.5 K  
 D1 2.00000000 sec  
 D11 0.03000000 sec  
 TD0 1

===== CHANNEL f1 =====  
 SFO1 75.4752949 MHz  
 NUC1 13C  
 P1 9.50 usec  
 PLW1 34.20000076 W

===== CHANNEL f2 =====  
 SFO2 300.1312005 MHz  
 NUC2 1H  
 CPDPRG[2] waltz16  
 PCPD2 90.00 usec  
 PLW2 14.00000000 W  
 PLW12 0.17284000 W  
 PLW13 0.14000000 W

F2 - Processing parameters  
 SI 32768  
 SF 75.4677485 MHz  
 WDW EM  
 SSB 0  
 LB 1.00 Hz  
 GB 0  
 PC 1.40

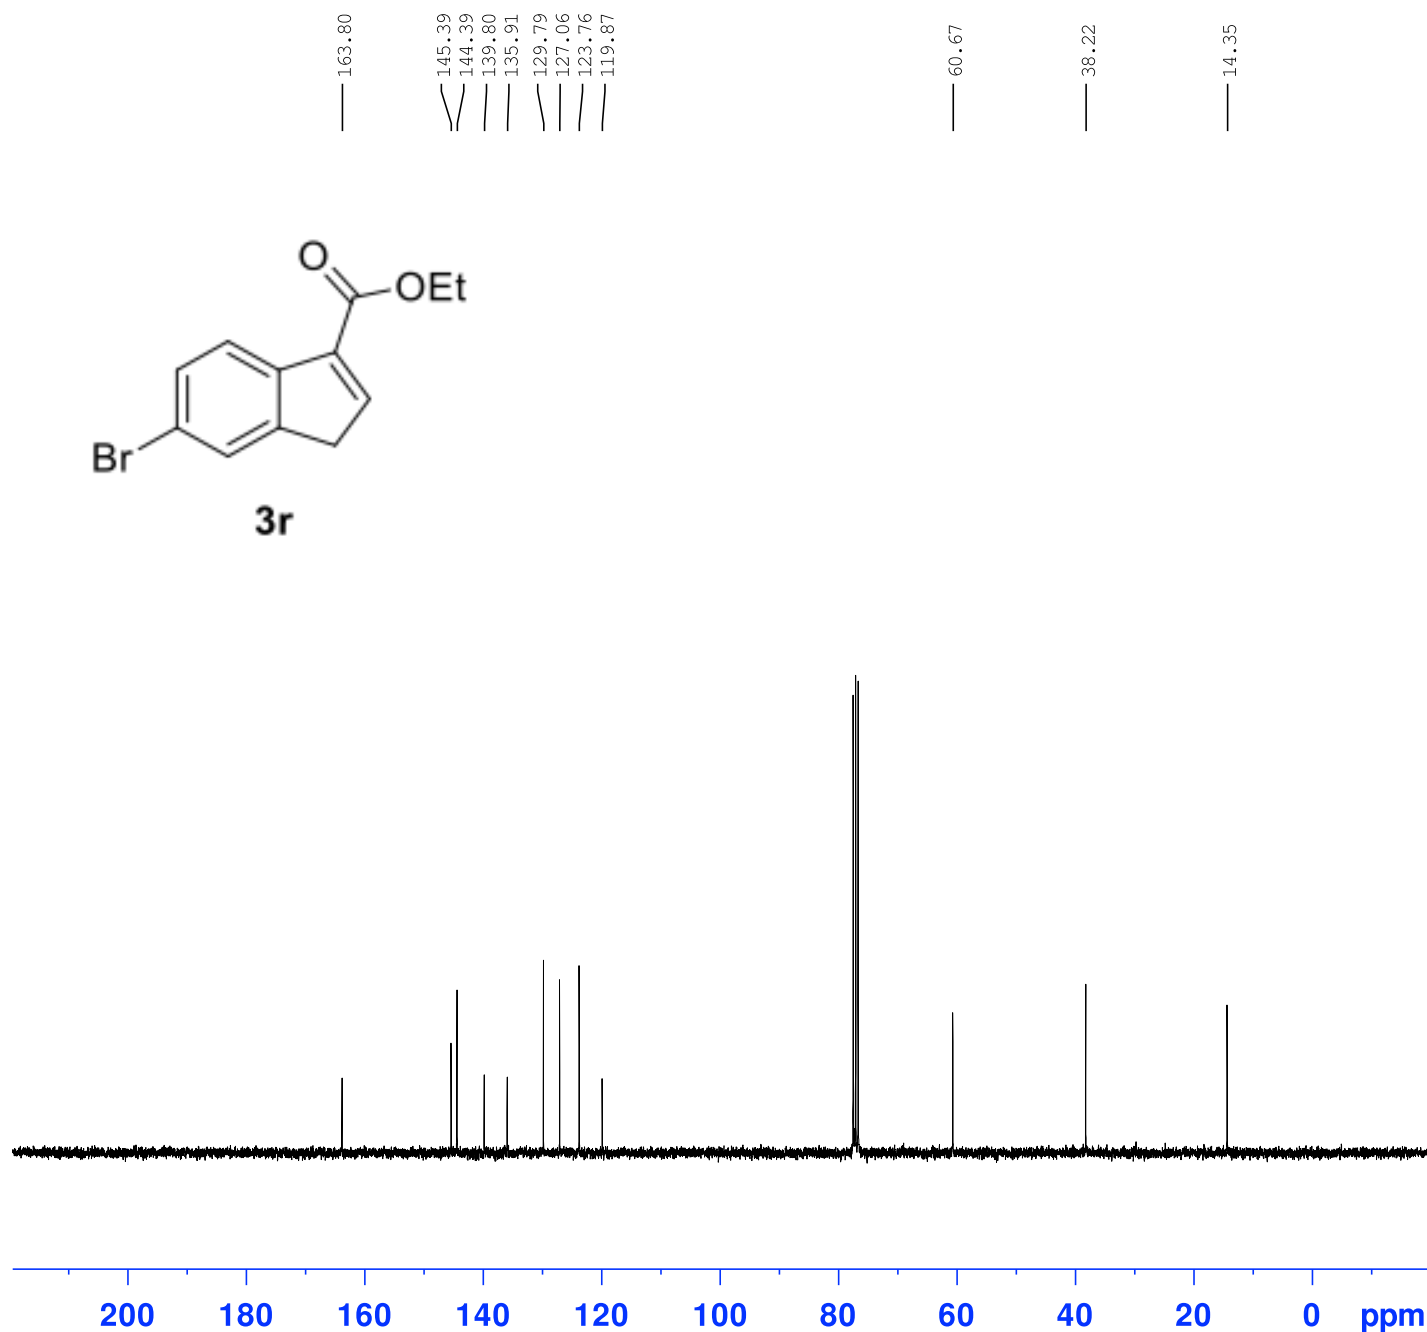



Current Data Parameters  
 NAME HNMR-YX-4-pl6  
 EXPNO 140  
 PROCNO 1

F2 - Acquisition Parameters  
 Date\_ 20230411  
 Time 13.59  
 INSTRUM spect  
 PROBHD 5 mm PABBO BB-  
 PULPROG zg30  
 TD 65536  
 SOLVENT CDCl3  
 NS 16  
 DS 2  
 SWH 6009.615 Hz  
 FIDRES 0.091699 Hz  
 AQ 5.4525952 sec  
 RG 101  
 DW 83.200 usec  
 DE 6.50 usec  
 TE 292.6 K  
 D1 1.00000000 sec  
 TD0 1

===== CHANNEL f1 =====  
 SFO1 300.1318534 MHz  
 NUC1 1H  
 P1 10.00 usec  
 PLW1 14.00000000 W

F2 - Processing parameters  
 SI 65536  
 SF 300.1300013 MHz  
 WDW EM  
 SSB 0  
 LB 0.30 Hz  
 GB 0  
 PC 1.00

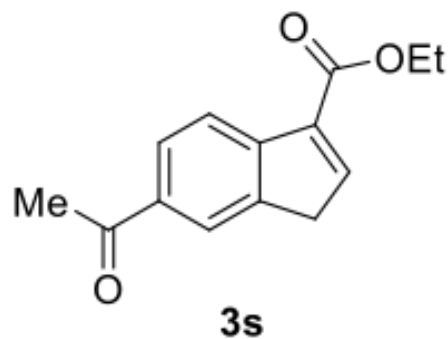

8.125  
8.098  
8.070  
7.988  
7.961  
7.634  
7.278

4.427  
4.403  
4.379  
4.356  
3.593

2.641

1.446  
1.423  
1.399

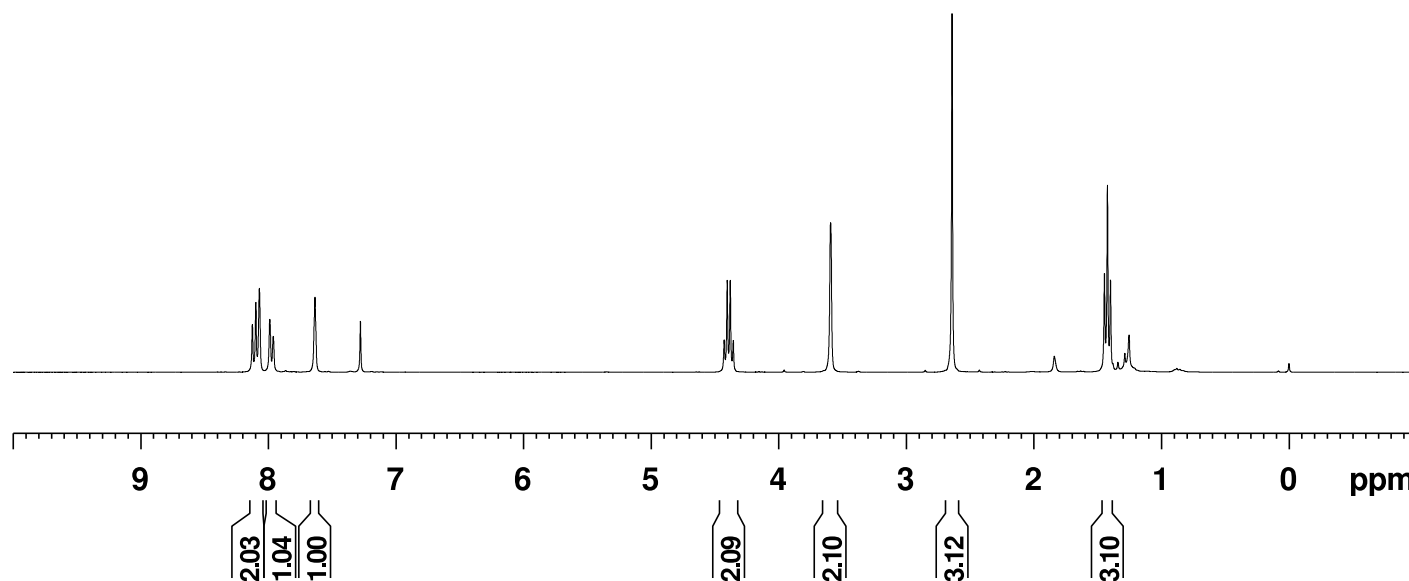



Current Data Parameters  
NAME CNMR-YX-4-pl6  
EXPNO 141  
PROCNO 1

F2 - Acquisition Parameters  
Date\_ 20230411  
Time 14.07  
INSTRUM spect  
PROBHD 5 mm PABBO BB-  
PULPROG zgpg30  
TD 65536  
SOLVENT CDC13  
NS 100  
DS 4  
SWH 18028.846 Hz  
FIDRES 0.275098 Hz  
AQ 1.8175317 sec  
RG 203  
DW 27.733 usec  
DE 6.50 usec  
TE 293.3 K  
D1 2.00000000 sec  
D11 0.03000000 sec  
TD0 1

===== CHANNEL f1 =====  
SFO1 75.4752949 MHz  
NUC1 13C  
P1 9.50 usec  
PLW1 34.20000076 W

===== CHANNEL f2 =====  
SFO2 300.1312005 MHz  
NUC2 1H  
CPDPRG[2] waltz16  
PCPD2 90.00 usec  
PLW2 14.00000000 W  
PLW12 0.17284000 W  
PLW13 0.14000000 W

F2 - Processing parameters  
SI 32768  
SF 75.4677485 MHz  
WDW EM  
SSB 0  
LB 1.00 Hz  
GB 0  
PC 1.40

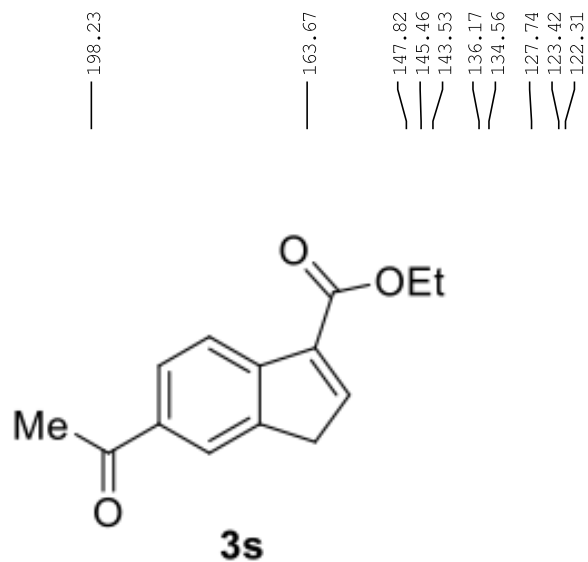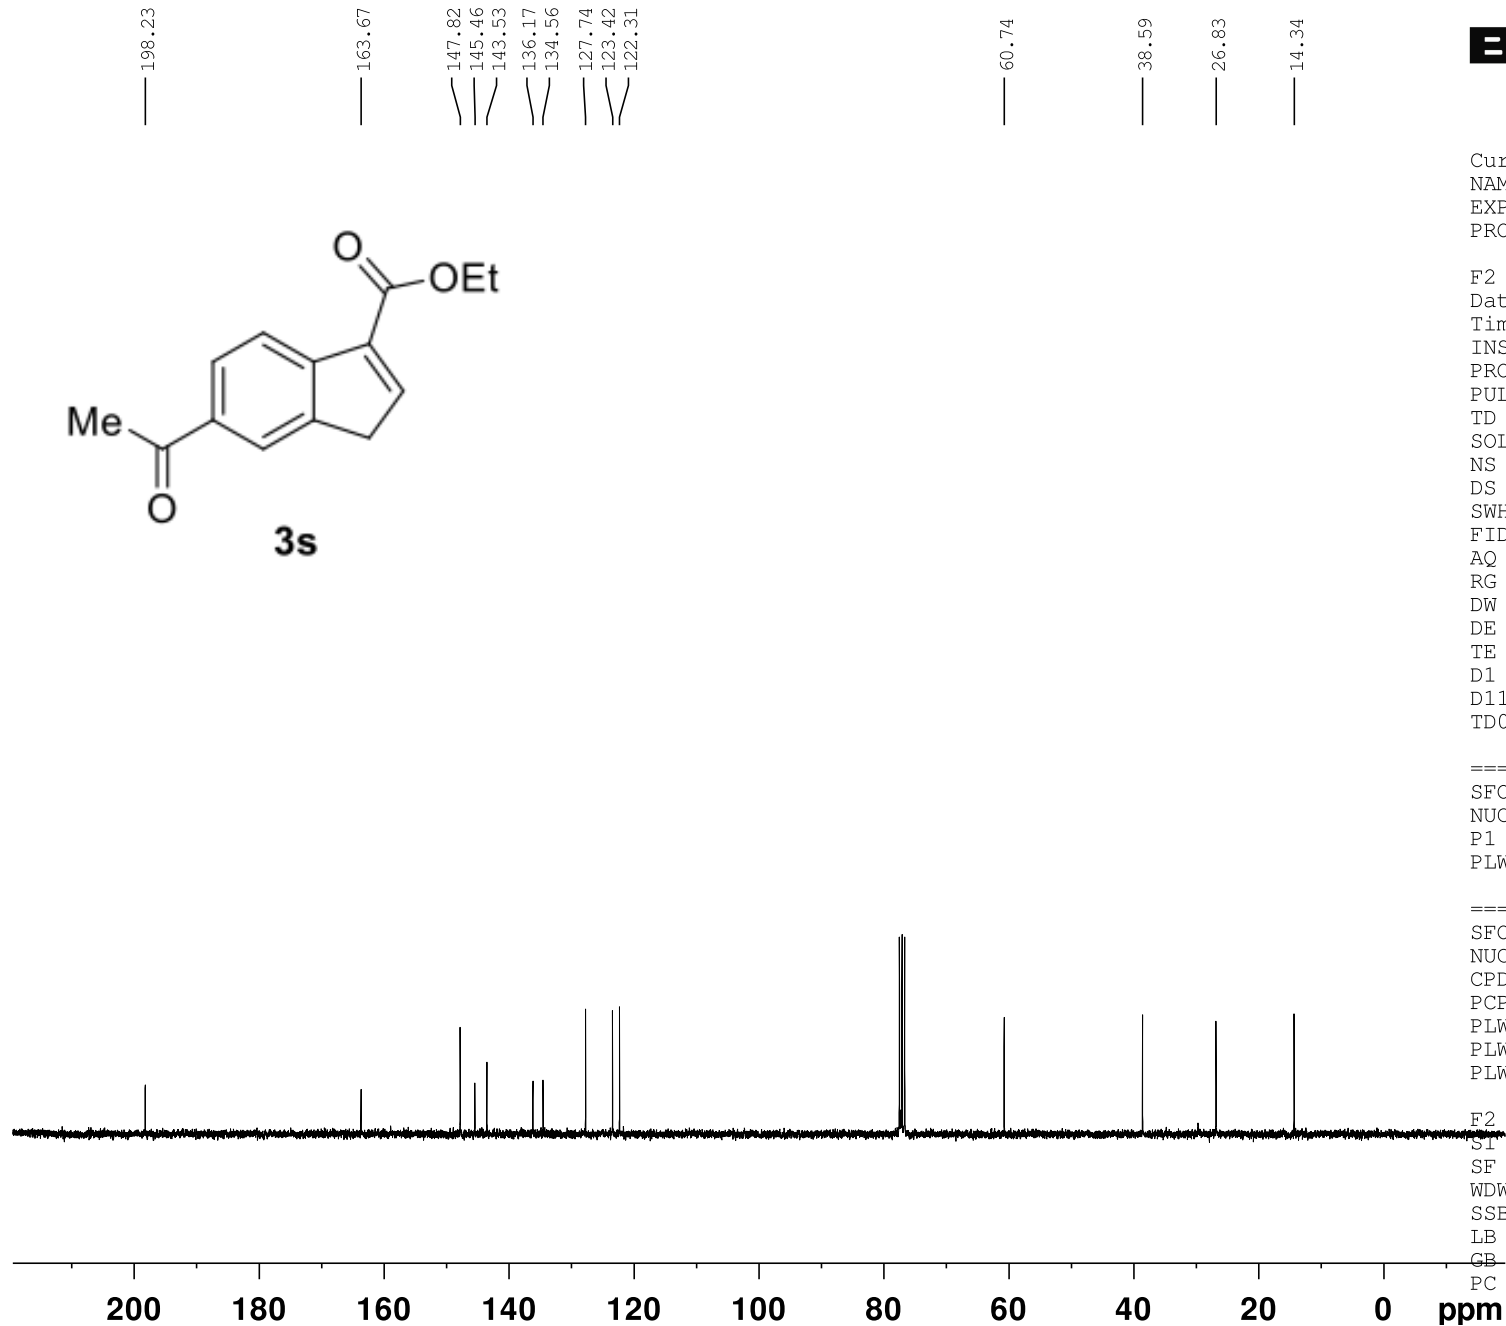

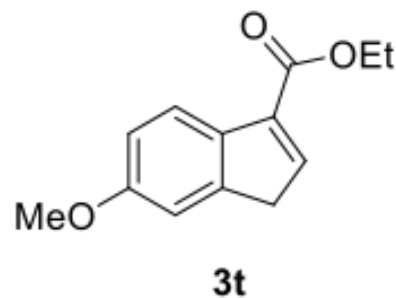

7.933  
7.905  
7.329  
7.323  
7.316  
7.055  
7.048  
6.927  
6.920  
6.899  
6.891

4.399  
4.375  
4.352  
4.328  
3.840  
3.483  
3.479

1.428  
1.404  
1.381



Current Data Parameters  
NAME HNMR-YX-1-p68  
EXPNO 499  
PROCNO 1

F2 - Acquisition Parameters  
Date\_ 20220725  
Time 16.00  
INSTRUM spect  
PROBHD 5 mm PABBO BB-  
PULPROG zg30  
TD 65536  
SOLVENT CDCl3  
NS 16  
DS 2  
SWH 6009.615 Hz  
FIDRES 0.091699 Hz  
AQ 5.4525952 sec  
RG 181  
DW 83.200 usec  
DE 6.50 usec  
TE -59.1 K  
D1 1.00000000 sec  
TD0 1

===== CHANNEL f1 =====  
SFO1 300.1318534 MHz  
NUC1 1H  
P1 10.00 usec  
PLW1 14.00000000 W

F2 - Processing parameters  
SI 65536  
SF 300.130072 MHz  
WDW EM  
SSB 0  
LB 0.30 Hz  
GB 0  
PC 1.00

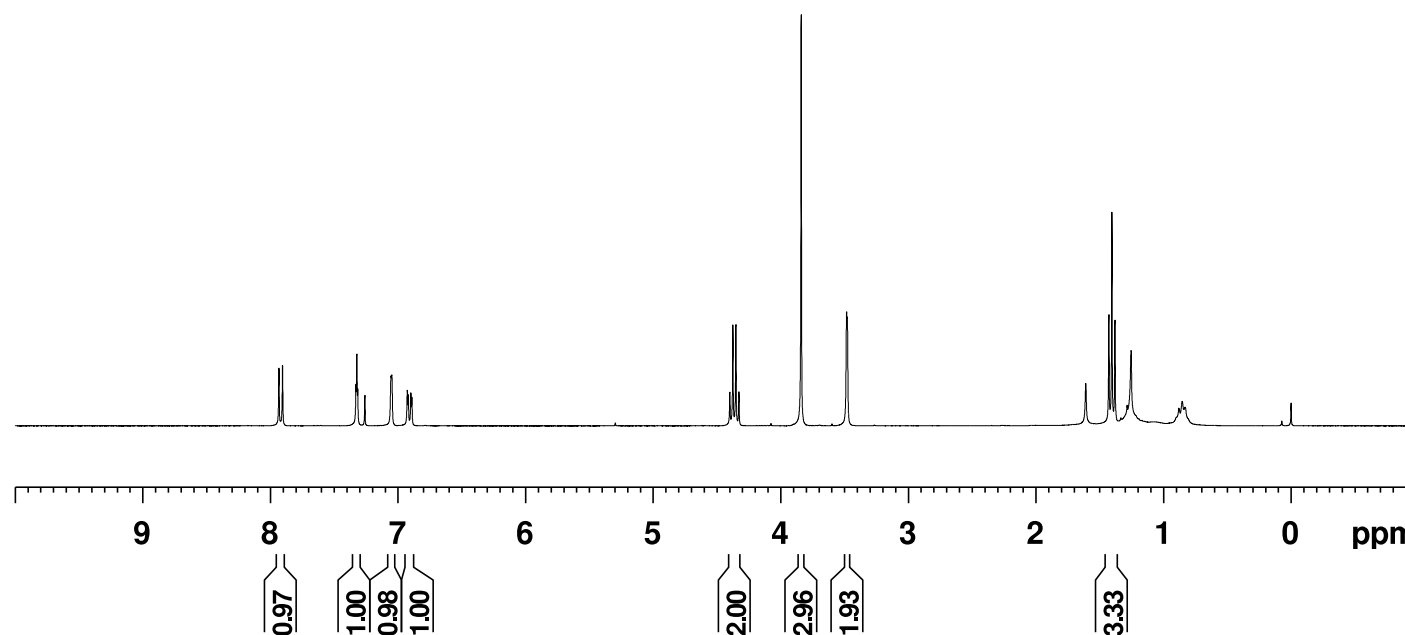



Current Data Parameters  
NAME CNMR-YX-1-p68  
EXPNO 69  
PROCNO 1

F2 - Acquisition Parameters  
Date\_ 20220725  
Time 21.59  
INSTRUM spect  
PROBHD 5 mm PABBO BB-  
PULPROG zgpg30  
TD 65536  
SOLVENT CDCl3  
NS 200  
DS 4  
SWH 18028.846 Hz  
FIDRES 0.275098 Hz  
AQ 1.8175317 sec  
RG 203  
DW 27.733 usec  
DE 6.50 usec  
TE -59.1 K  
D1 2.00000000 sec  
D11 0.03000000 sec  
TD0 1

===== CHANNEL f1 =====  
SFO1 75.4752949 MHz  
NUC1 13C  
P1 9.50 usec  
PLW1 34.20000076 W

===== CHANNEL f2 =====  
SFO2 300.1312005 MHz  
NUC2 1H  
CPDPRG[2] waltz16  
PCPD2 90.00 usec  
PLW2 14.00000000 W  
PLW12 0.17284000 W  
PLW13 0.14000000 W

F2 - Processing parameters  
SI 32768  
SF 75.4677485 MHz  
WDW EM  
SSB 0  
LB 1.00 Hz  
GB 0  
PC 1.40

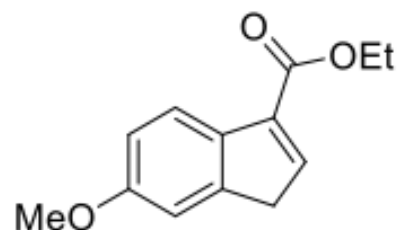

3t

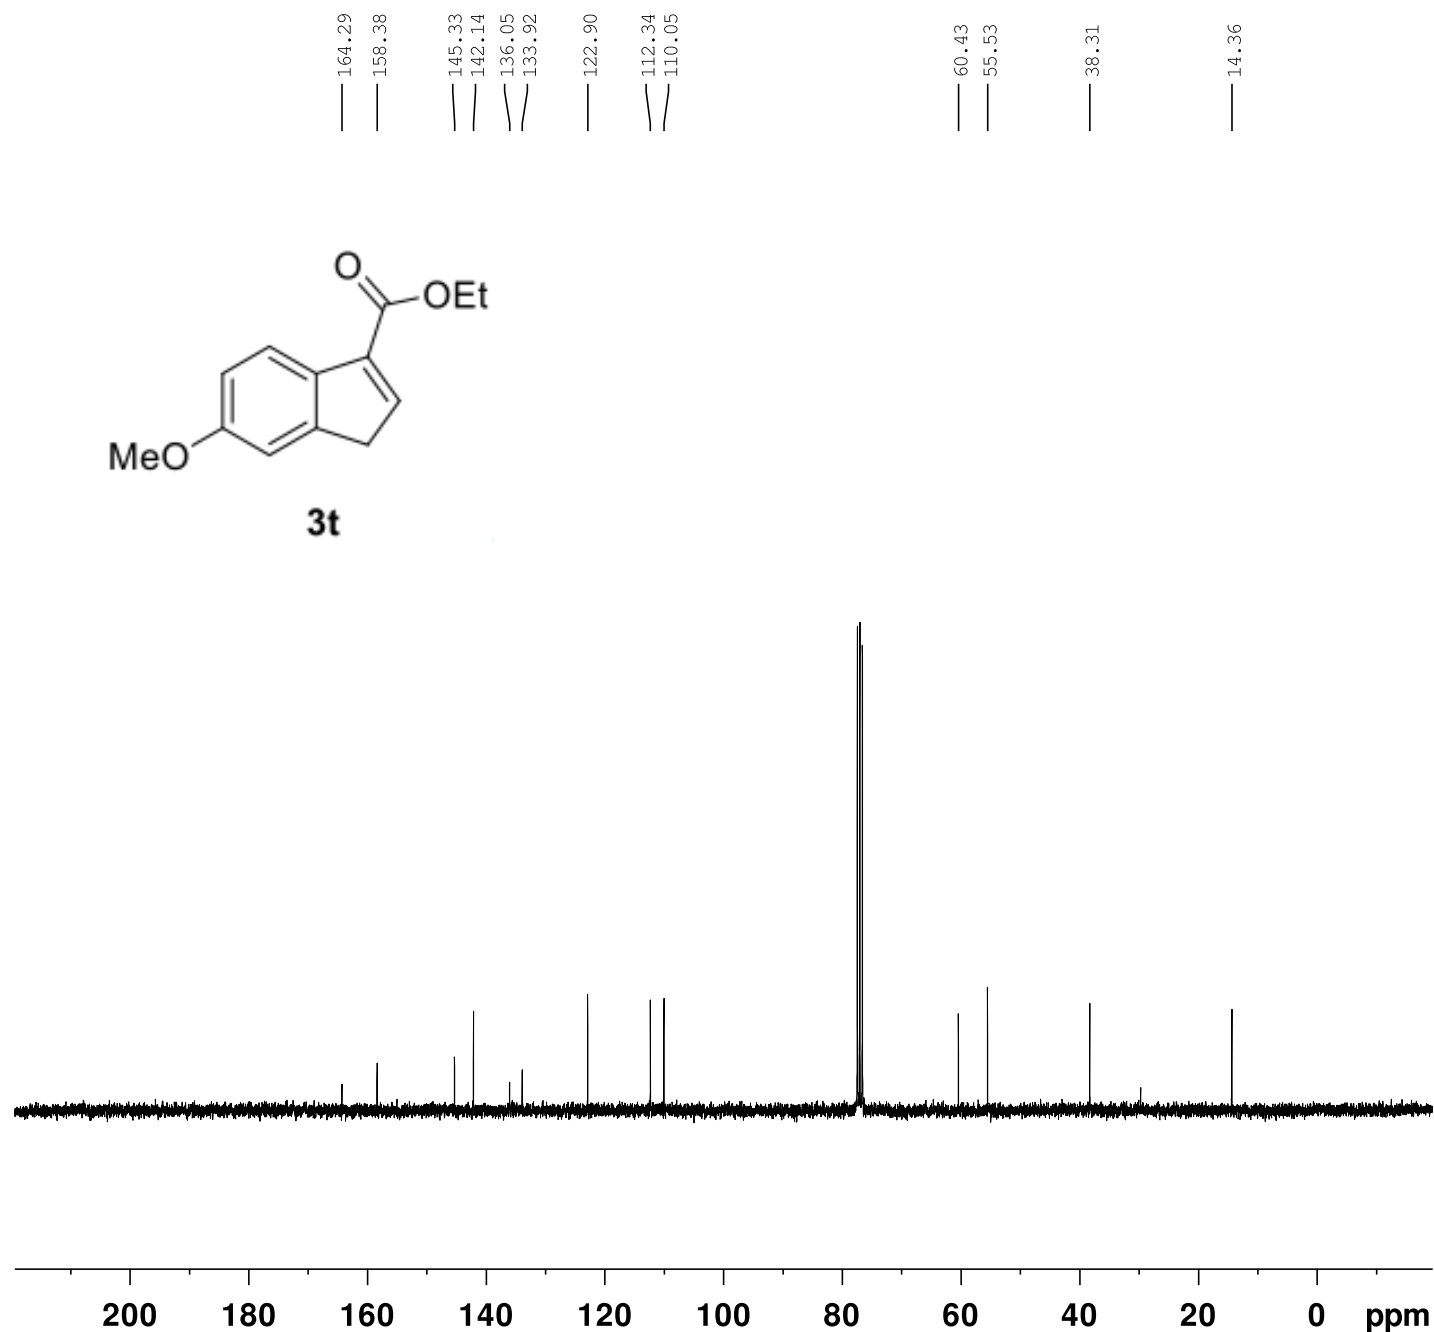

7.784  
7.759  
7.325  
7.300  
7.251  
7.228  
7.203  
7.179  
7.175  
7.154  
7.150  
7.130  
7.126

4.356  
4.332  
4.308  
4.285  
3.695

1.369  
1.345  
1.322

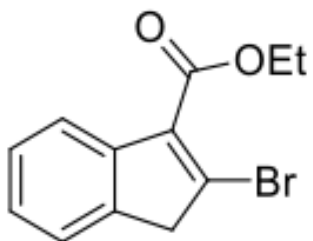

**3u**



Current Data Parameters  
NAME HNMR-YX-1-p70  
EXPNO 446  
PROCNO 1

F2 - Acquisition Parameters  
Date\_ 20220719  
Time 14.52  
INSTRUM spect  
PROBHD 5 mm PABBO BB-  
PULPROG zg30  
TD 65536  
SOLVENT CD2Cl2  
NS 16  
DS 2  
SWH 6009.615 Hz  
FIDRES 0.091699 Hz  
AQ 5.4525952 sec  
RG 203  
DW 83.200 usec  
DE 6.50 usec  
TE -59.1 K  
D1 1.00000000 sec  
TD0 1

===== CHANNEL f1 =====  
SFO1 300.1318534 MHz  
NUC1 1H  
P1 10.00 usec  
PLW1 14.00000000 W

F2 - Processing parameters  
SI 65536  
SF 300.1300375 MHz  
WDW EM  
SSB 0  
LB 0.30 Hz  
GB 0  
PC 1.00

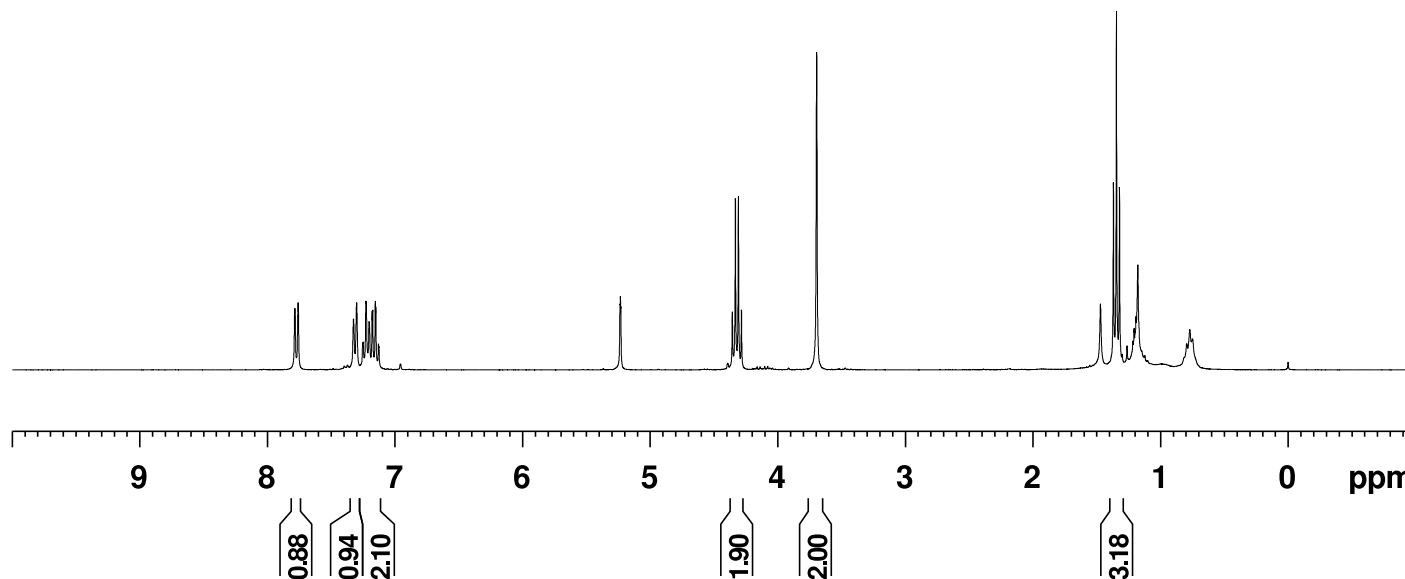



Current Data Parameters  
NAME CNMR-YX-1-p70  
EXPNO 450  
PROCNO 1

F2 - Acquisition Parameters

Date\_ 20220720  
Time 15.18  
INSTRUM spect  
PROBHD 5 mm PABBO BB-  
PULPROG zgpg30  
TD 65536  
SOLVENT CD2Cl2  
NS 200  
DS 4  
SWH 18028.846 Hz  
FIDRES 0.275098 Hz  
AQ 1.8175317 sec  
RG 203  
DW 27.733 usec  
DE 6.50 usec  
TE -59.1 K  
D1 2.00000000 sec  
D11 0.03000000 sec  
TD0 1

===== CHANNEL f1 =====

SFO1 75.4752949 MHz  
NUC1 13C  
P1 9.50 usec  
PLW1 34.20000076 W

===== CHANNEL f2 =====

SFO2 300.1312005 MHz  
NUC2 1H  
CPDPRG[2] waltz16  
PCPD2 90.00 usec  
PLW2 14.00000000 W  
PLW12 0.17284000 W  
PLW13 0.14000000 W

F2 - Processing parameters

SI 32768  
SF 75.4677485 MHz  
WDW EM  
SSB 0  
LB 1.00 Hz  
GB 0  
PC 1.40

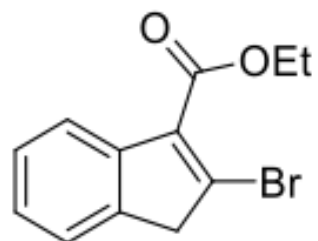

3u

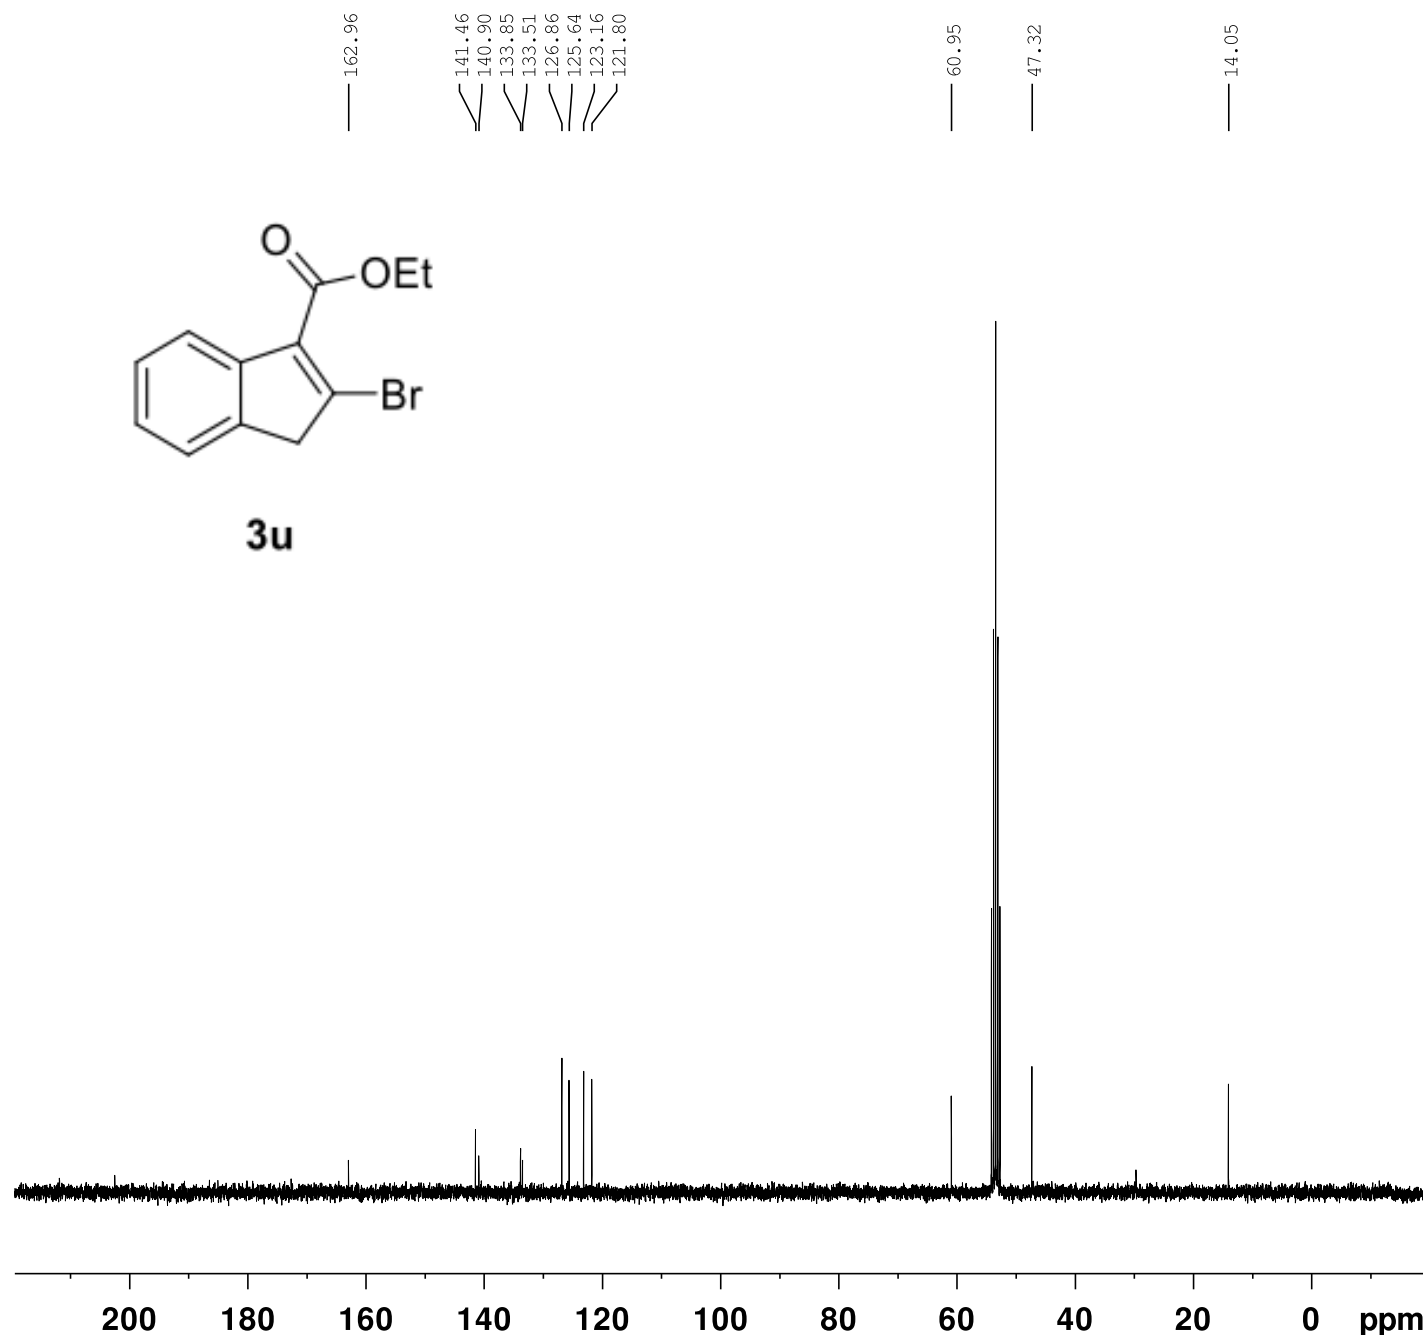

S64





Current Data Parameters  
 NAME HNMR-YX-3-p36  
 EXPNO 1  
 PROCNO 1

F2 - Acquisition Parameters  
 Date\_ 20230207  
 Time 18.45 h  
 INSTRUM Avance  
 PROBHD Z116098\_0833 (  
 PULPROG zg30  
 TD 65536  
 SOLVENT CDCl3  
 NS 16  
 DS 2  
 SWH 8196.722 Hz  
 FIDRES 0.250144 Hz  
 AQ 3.9976959 sec  
 RG 65.4108  
 DW 61.000 usec  
 DE 13.54 usec  
 TE 294.3 K  
 D1 1.00000000 sec  
 TD0 1  
 SFO1 400.1324708 MHz  
 NUC1 1H  
 P0 3.33 usec  
 P1 10.00 usec  
 PLW1 20.73200035 W

F2 - Processing parameters  
 SI 65536  
 SF 400.1300541 MHz  
 WDW EM  
 SSB 0  
 LB 0.30 Hz  
 GB 0  
 PC 1.00

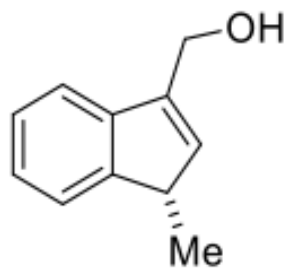

**3v**  
 racemic  
 major isomer

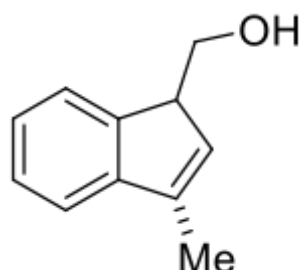

minor isomer

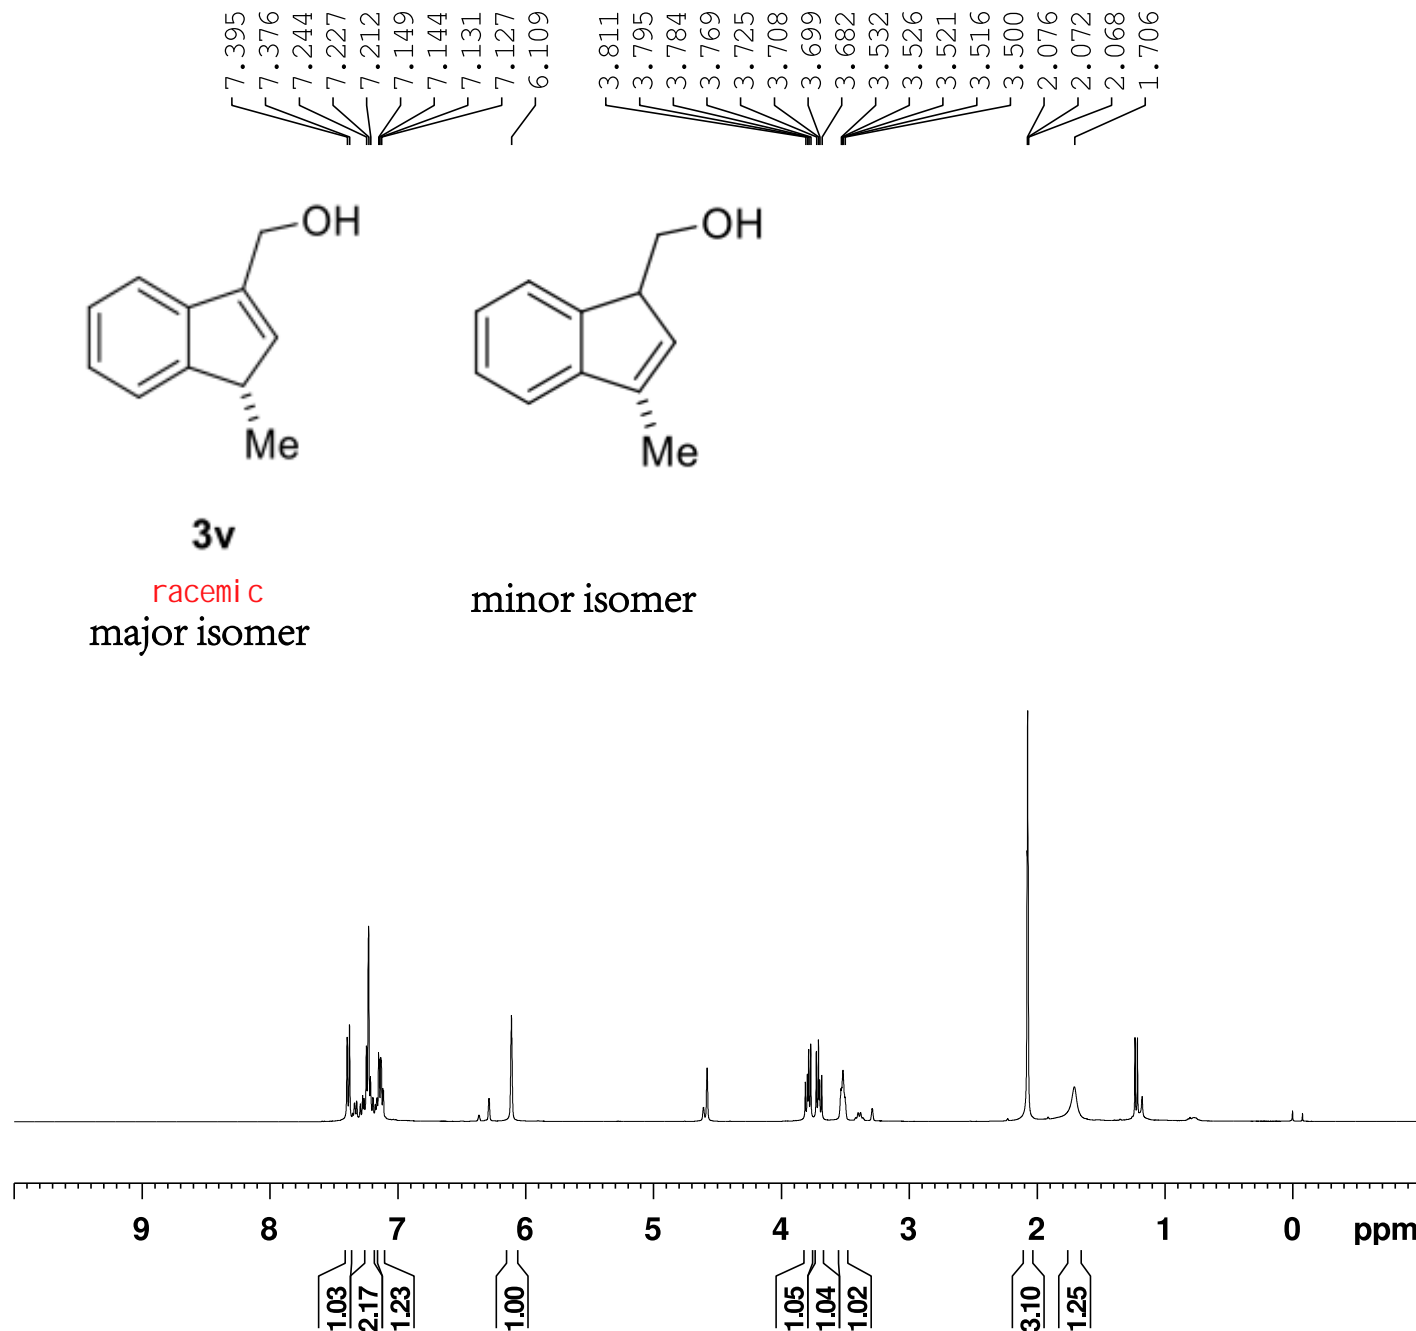

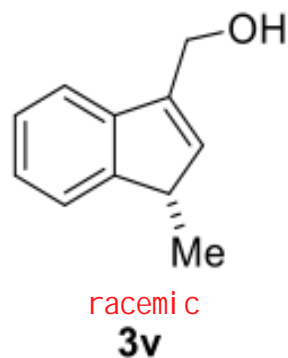

146.17  
145.00  
141.08  
130.73  
127.03  
125.01  
123.16  
119.23

63.94

51.91

13.10



Current Data Parameters  
NAME CNMR-YX-3-p36  
EXPNO 2  
PROCNO 1

F2 - Acquisition Parameters  
Date\_ 20230208  
Time 1.03 h  
INSTRUM Avance  
PROBHD Z116098\_0833 (  
PULPROG zgpg30  
TD 65536  
SOLVENT CDCl3  
NS 400  
DS 4  
SWH 23809.523 Hz  
FIDRES 0.726609 Hz  
AQ 1.3762560 sec  
RG 51.55  
DW 21.000 usec  
DE 6.50 usec  
TE 296.3 K  
D1 2.00000000 sec  
D11 0.03000000 sec  
TD0 1  
SFO1 100.6228298 MHz  
NUC1 13C  
P0 3.33 usec  
P1 10.00 usec  
PLW1 87.89900208 W  
SFO2 400.1316005 MHz  
NUC2 1H  
CPDPRG[2] waltz65  
PCPD2 90.00 usec  
PLW2 20.73200035 W  
PLW12 0.25595000 W  
PLW13 0.12874000 W

F2 - Processing parameters  
SI 32768  
SF 100.6127685 MHz  
WDW EM  
SSB 0  
LB 1.00 Hz  
GB 0  
PC 1.40

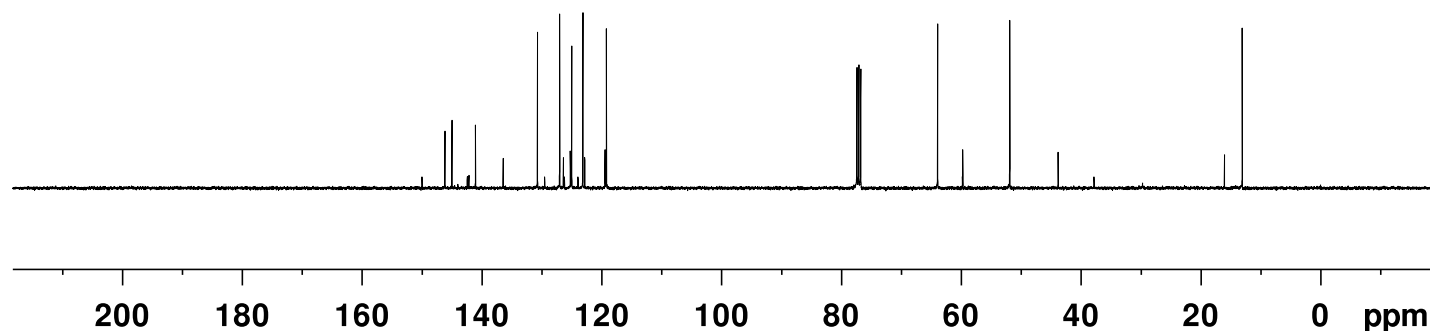



Current Data Parameters  
NAME HNMR-YX-3-p44  
EXPNO 1  
PROCNO 1

F2 - Acquisition Parameters  
Date\_ 20230214  
Time 19.12 h  
INSTRUM Avance  
PROBHD Z116098\_0833 (  
PULPROG zg30  
TD 65536  
SOLVENT CDCl3  
NS 16  
DS 2  
SWH 8196.722 Hz  
FIDRES 0.250144 Hz  
AQ 3.9976959 sec  
RG 77.1605  
DW 61.000 usec  
DE 13.54 usec  
TE 294.0 K  
D1 1.00000000 sec  
TD0 1  
SFO1 400.1324708 MHz  
NUC1 1H  
P0 3.33 usec  
P1 10.00 usec  
PLW1 20.73200035 W

F2 - Processing parameters  
SI 65536  
SF 400.1300209 MHz  
WDW EM  
SSB 0  
LB 0.30 Hz  
GB 0  
PC 1.00

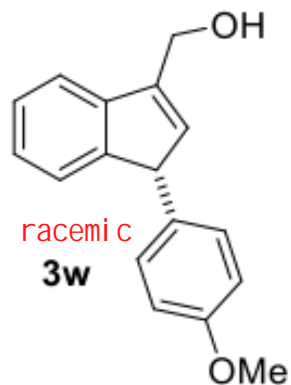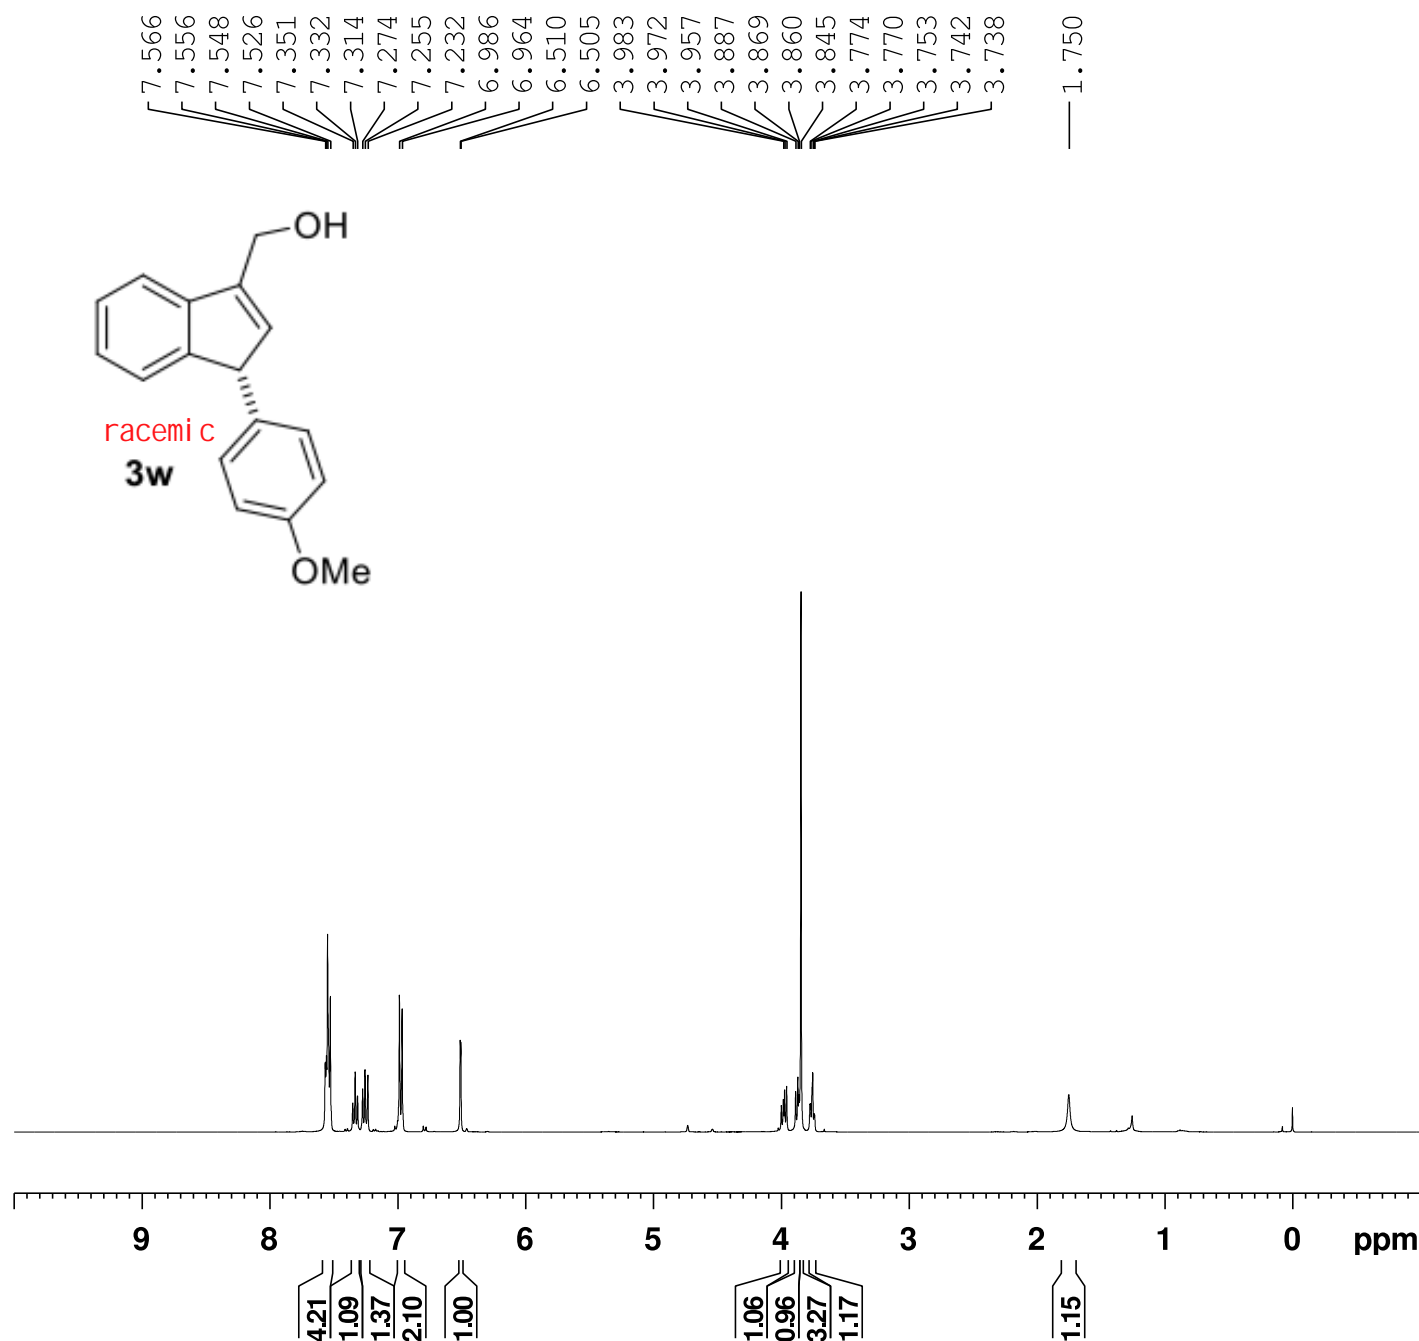



Current Data Parameters  
NAME CNMR-YX-3-p44  
EXPNO 2  
PROCNO 1

F2 - Acquisition Parameters  
Date\_ 20230215  
Time 3.52 h  
INSTRUM Avance  
PROBHD Z116098\_0833 (  
PULPROG zgpg30  
TD 65536  
SOLVENT CDCl3  
NS 200  
DS 4  
SWH 23809.523 Hz  
FIDRES 0.726609 Hz  
AQ 1.3762560 sec  
RG 48.6724  
DW 21.000 usec  
DE 6.50 usec  
TE 295.9 K  
D1 2.00000000 sec  
D11 0.03000000 sec  
TD0 1  
SFO1 100.6228298 MHz  
NUC1 13C  
P0 3.33 usec  
P1 10.00 usec  
PLW1 87.89900208 W  
SFO2 400.1316005 MHz  
NUC2 1H  
CPDPRG[2] waltz65  
PCPD2 90.00 usec  
PLW2 20.73200035 W  
PLW12 0.25595000 W  
PLW13 0.12874000 W

F2 - Processing parameters  
SI 32768  
SF 100.6127685 MHz  
WDW EM  
SSB 0  
LB 1.00 Hz  
GB 0  
PC 1.40

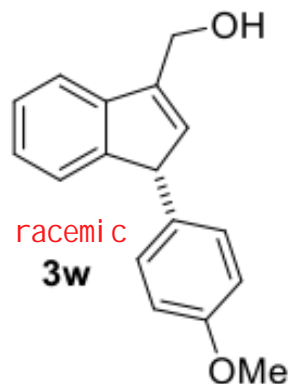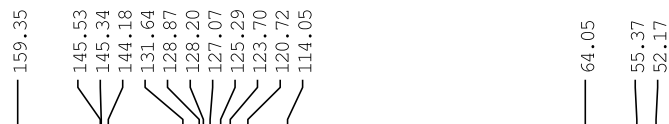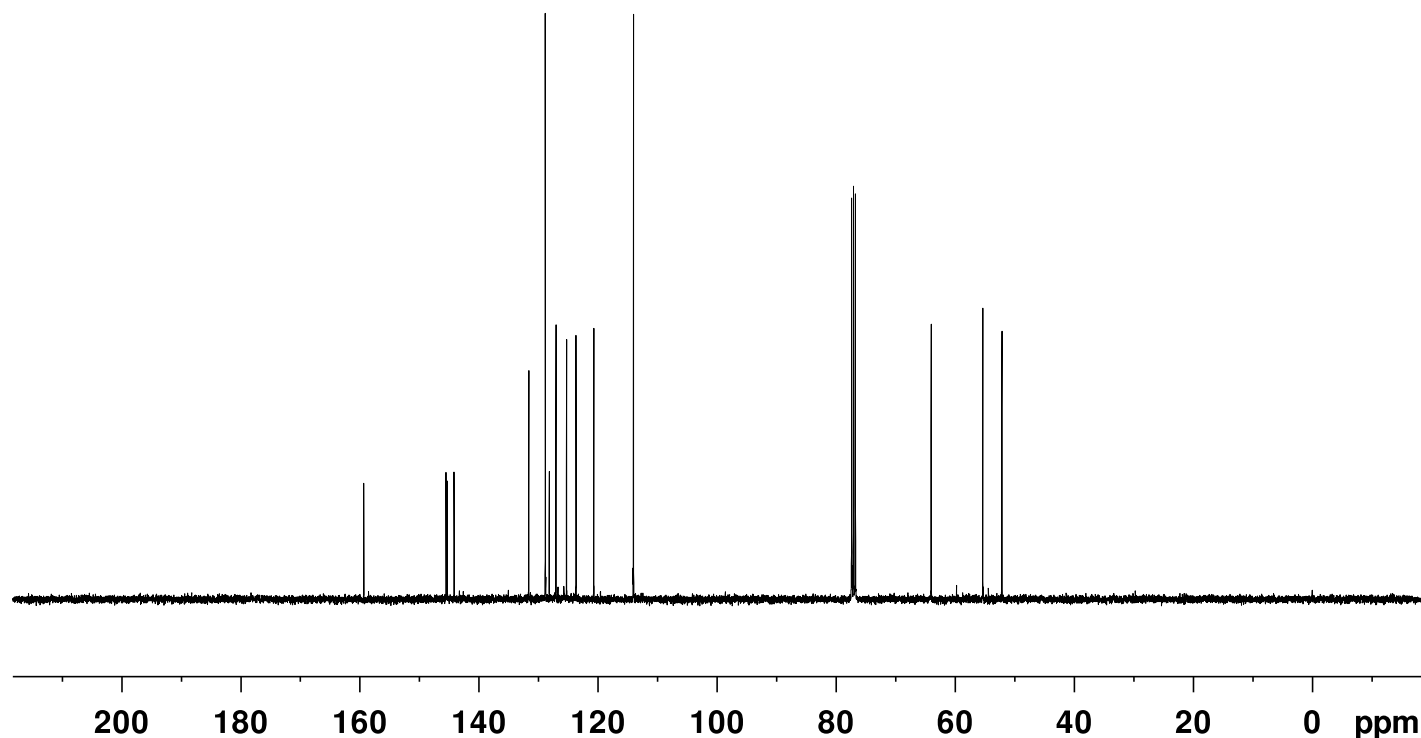



Current Data Parameters  
NAME HNMR-YX-3-p35 (A)  
EXPNO 1  
PROCNO 1

F2 - Acquisition Parameters  
Date\_ 20230207  
Time 18.26 h  
INSTRUM Avance  
PROBHD Z116098\_0833 (  
PULPROG zg30  
TD 65536  
SOLVENT CDCl3  
NS 16  
DS 2  
SWH 8196.722 Hz  
FIDRES 0.250144 Hz  
AQ 3.9976959 sec  
RG 42.5532  
DW 61.000 usec  
DE 13.54 usec  
TE 294.3 K  
D1 1.00000000 sec  
TD0 1  
SFO1 400.1324708 MHz  
NUC1 1H  
P0 3.33 usec  
P1 10.00 usec  
PLW1 20.73200035 W

F2 - Processing parameters  
SI 65536  
SF 400.1300547 MHz  
WDW EM  
SSB 0  
LB 0.30 Hz  
GB 0  
PC 1.00

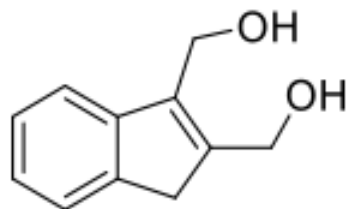

3x

7.233  
7.214  
7.190  
7.172  
7.164  
7.146  
7.127  
7.083  
7.080  
7.065  
7.062  
7.047  
7.044  
6.577  
4.425  
4.392  
4.362  
4.330  
4.050  
4.038  
4.023  
4.012  
3.495  
3.484  
3.474  
3.463  
3.392  
3.365  
3.343

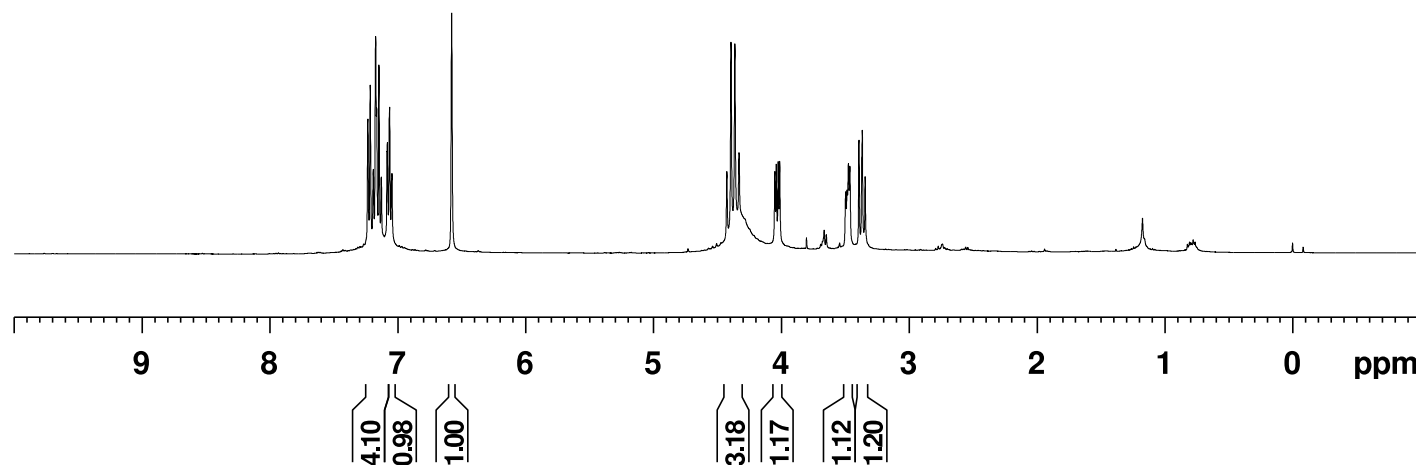

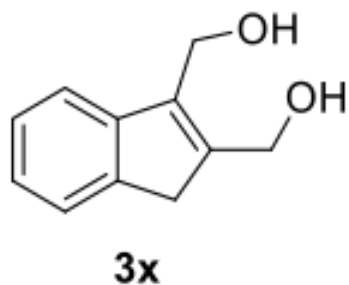

149.98  
143.87  
143.69  
130.20  
127.28  
125.20  
123.20  
121.27

63.71  
60.72  
53.95



Current Data Parameters  
NAME CNMR-YX-3-p35 (A)  
EXPNO 1  
PROCNO 1

F2 - Acquisition Parameters  
Date\_ 20230209  
Time 0.02 h  
INSTRUM Avance  
PROBHD Z116098\_0833 (  
PULPROG zgpg30  
TD 65536  
SOLVENT CDCl3  
NS 300  
DS 4  
SWH 23809.523 Hz  
FIDRES 0.726609 Hz  
AQ 1.3762560 sec  
RG 50.1934  
DW 21.000 usec  
DE 6.50 usec  
TE 295.3 K  
D1 2.00000000 sec  
D11 0.03000000 sec  
TD0 1  
SFO1 100.6228298 MHz  
NUC1 13C  
P0 3.33 usec  
P1 10.00 usec  
PLW1 87.89900208 W  
SFO2 400.1316005 MHz  
NUC2 1H  
CPDPRG[2] waltz65  
PCPD2 90.00 usec  
PLW2 20.73200035 W  
PLW12 0.25595000 W  
PLW13 0.12874000 W

F2 - Processing parameters  
SI 32768  
SF 100.6127685 MHz  
WDW EM  
SSB 0  
LB 1.00 Hz  
GB 0  
PC 1.40

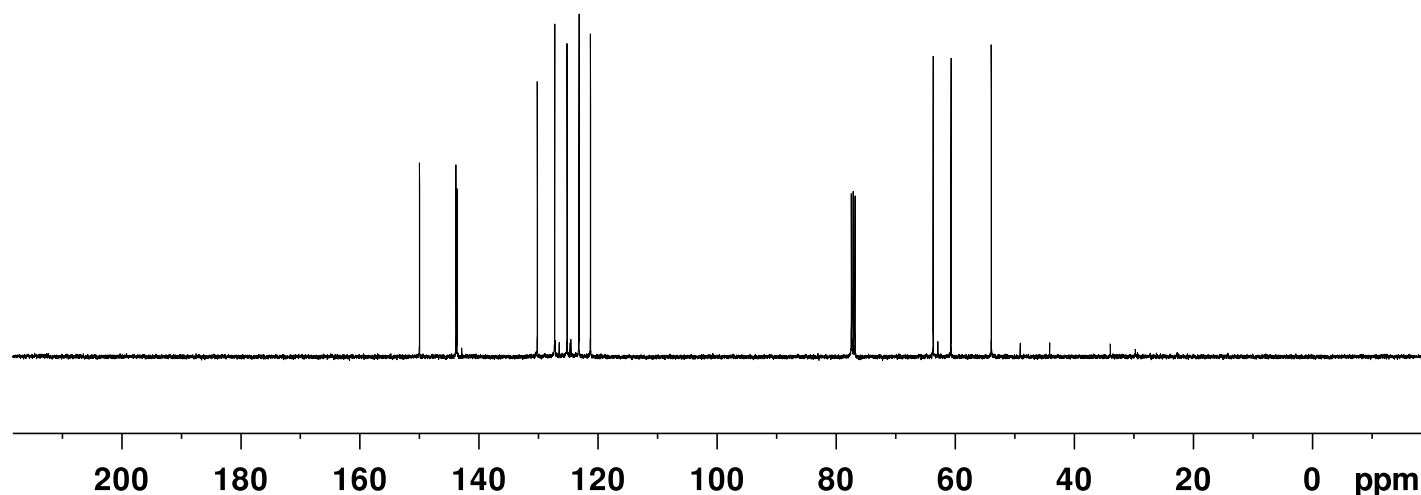

S70

10.206  
7.958  
7.939  
7.801  
7.782  
7.550  
7.532  
7.422  
7.418  
7.413  
7.380  
7.361  
7.341  
7.335  
7.316  
7.284  
7.281  
7.265  
7.263  
7.247  
7.244  
7.120  
7.101  
7.083

3.631  
3.628

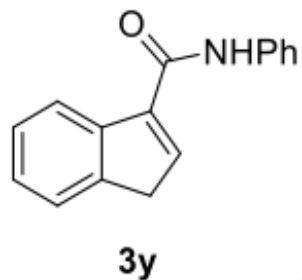

Current Data Parameters  
NAME HNMR-YX-3-p55  
EXPNO 1  
PROCNO 1

F2 - Acquisition Parameters  
Date\_ 20230228  
Time 3.44 h  
INSTRUM Avance  
PROBHD Z116098\_0833 (  
PULPROG zg30  
TD 65536  
SOLVENT DMSO  
NS 16  
DS 2  
SWH 8196.722 Hz  
FIDRES 0.250144 Hz  
AQ 3.9976959 sec  
RG 93.7735  
DW 61.000 usec  
DE 13.54 usec  
TE 294.9 K  
D1 1.00000000 sec  
TD0 1  
SFO1 400.1324708 MHz  
NUC1 1H  
P0 3.33 usec  
P1 10.00 usec  
PLW1 20.73200035 W

F2 - Processing parameters  
SI 65536  
SF 400.1300025 MHz  
WDW EM  
SSB 0  
LB 0.30 Hz  
GB 0  
PC 1.00

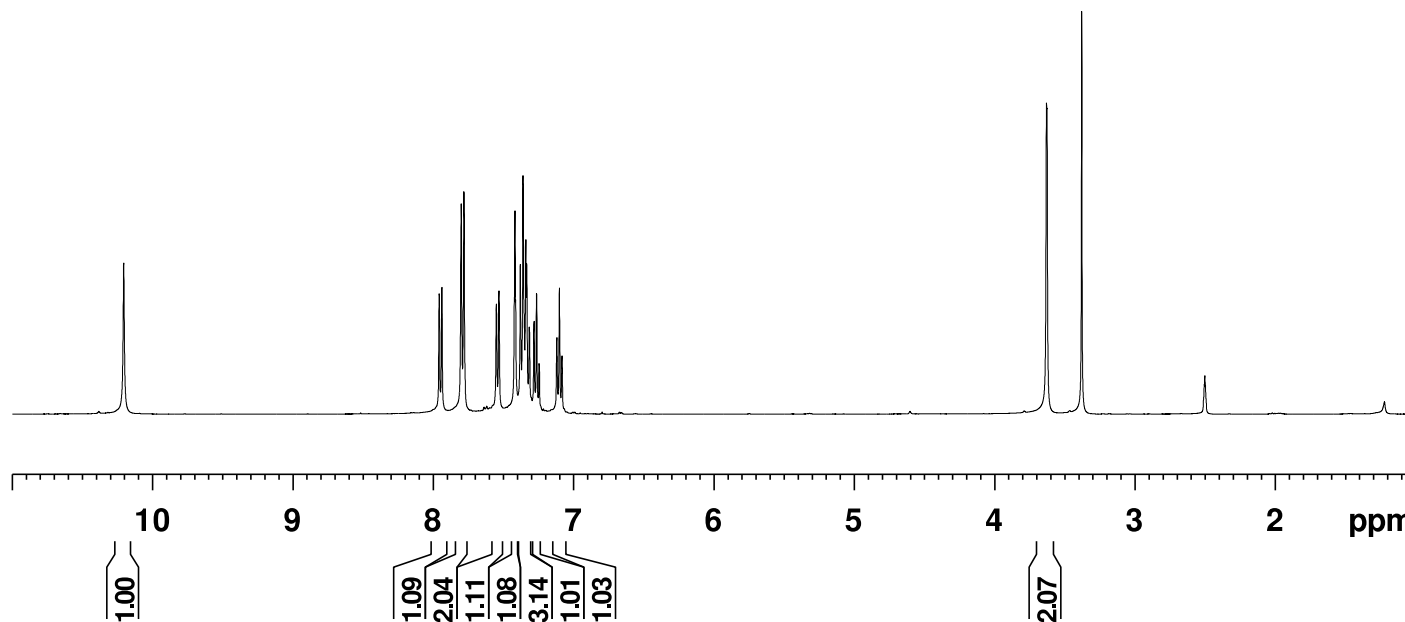



Current Data Parameters  
 NAME CNMR-YX-3-p55  
 EXPNO 2  
 PROCNO 1

F2 - Acquisition Parameters  
 Date\_ 20230228  
 Time 4.08 h  
 INSTRUM Avance  
 PROBHD Z116098\_0833 (  
 PULPROG zgpg30  
 TD 65536  
 SOLVENT DMSO  
 NS 400  
 DS 4  
 SWH 23809.523 Hz  
 FIDRES 0.726609 Hz  
 AQ 1.3762560 sec  
 RG 51.55  
 DW 21.000 usec  
 DE 6.50 usec  
 TE 295.6 K  
 D1 2.00000000 sec  
 D11 0.03000000 sec  
 TD0 1  
 SFO1 100.6228298 MHz  
 NUC1 <sup>13</sup>C  
 P0 3.33 usec  
 P1 10.00 usec  
 PLW1 87.89900208 W  
 SFO2 400.1316005 MHz  
 NUC2 <sup>1</sup>H  
 CPDPRG[2] waltz65  
 PCPD2 90.00 usec  
 PLW2 20.73200035 W  
 PLW12 0.25595000 W  
 PLW13 0.12874000 W

F2 - Processing parameters  
 SI 32768  
 SF 100.6127685 MHz  
 WDW EM  
 SSB 0  
 LB 1.00 Hz  
 GB 0  
 PC 1.40

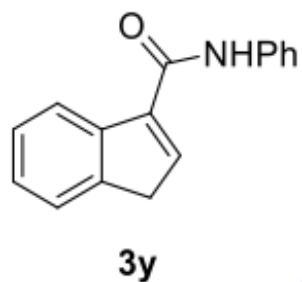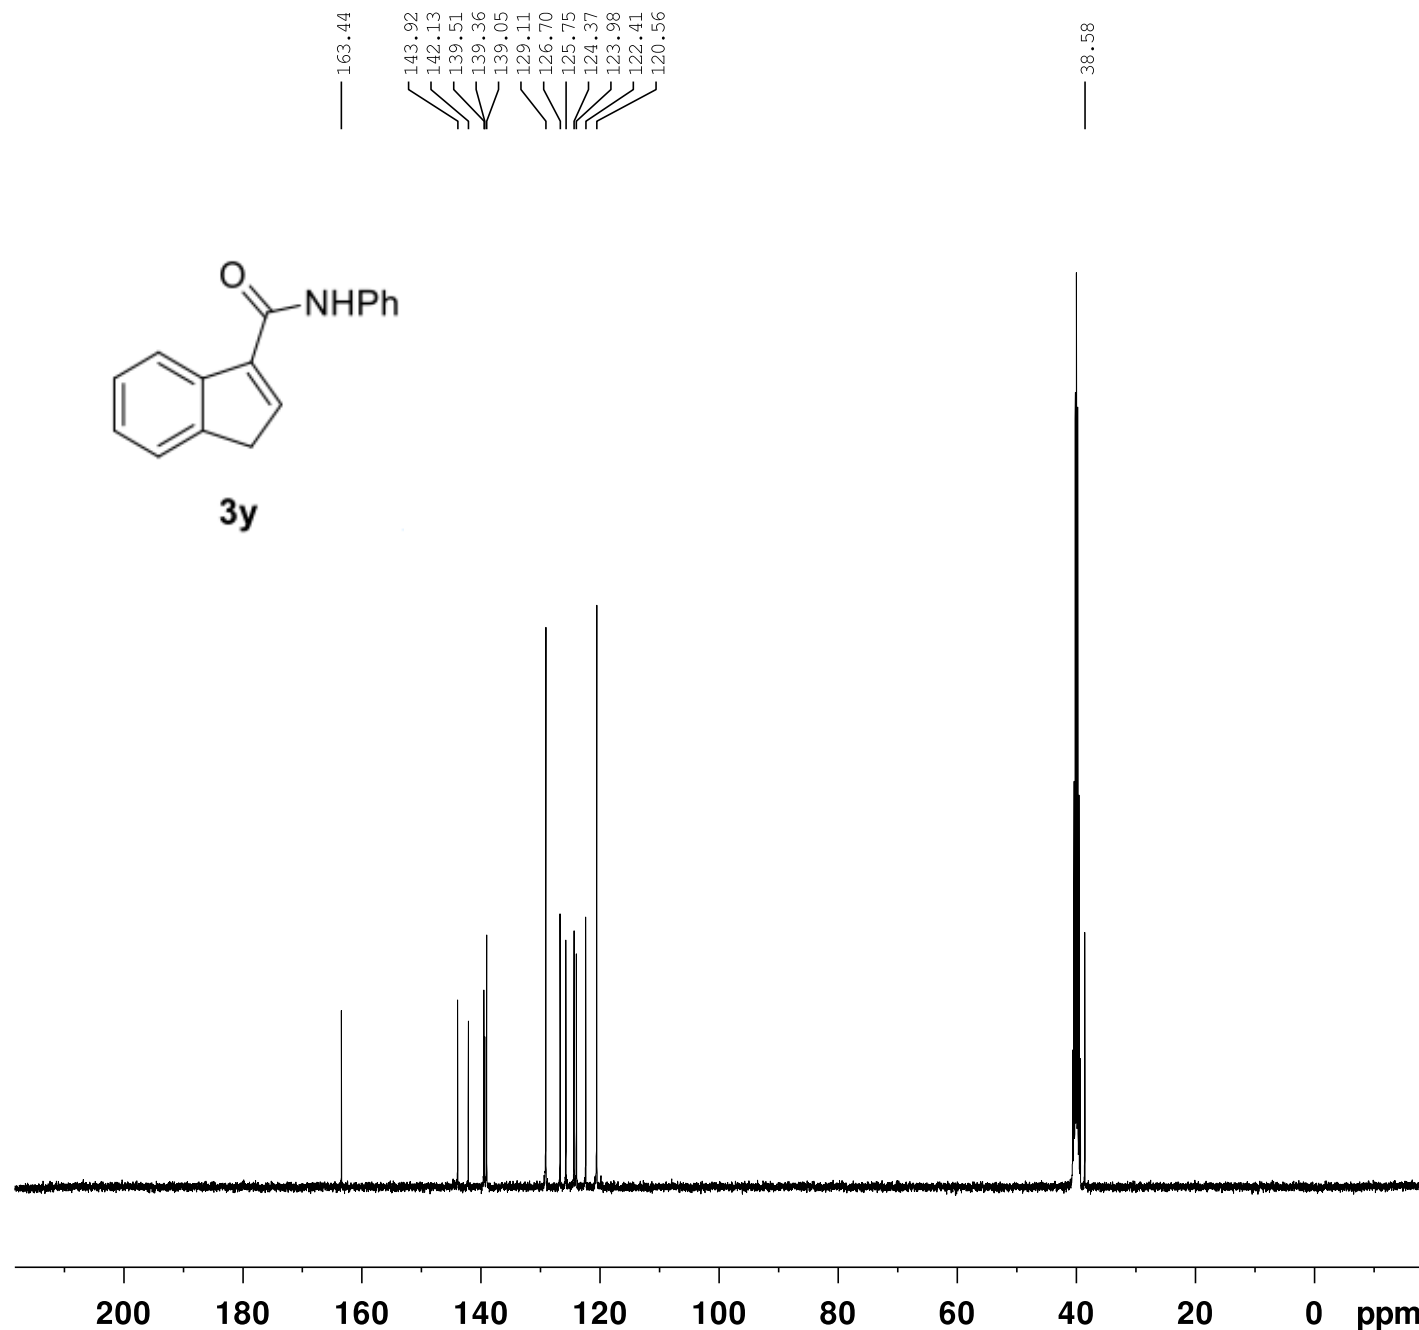



8.123  
8.097  
7.695  
7.527  
7.502  
7.462  
7.436  
7.410  
7.379  
7.354  
7.320  
7.296  
7.273  
7.241  
7.232  
7.215

— 3.608

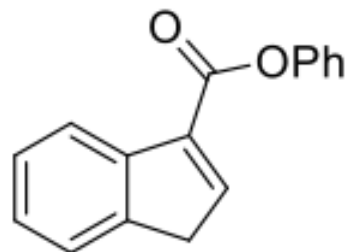

**3z**

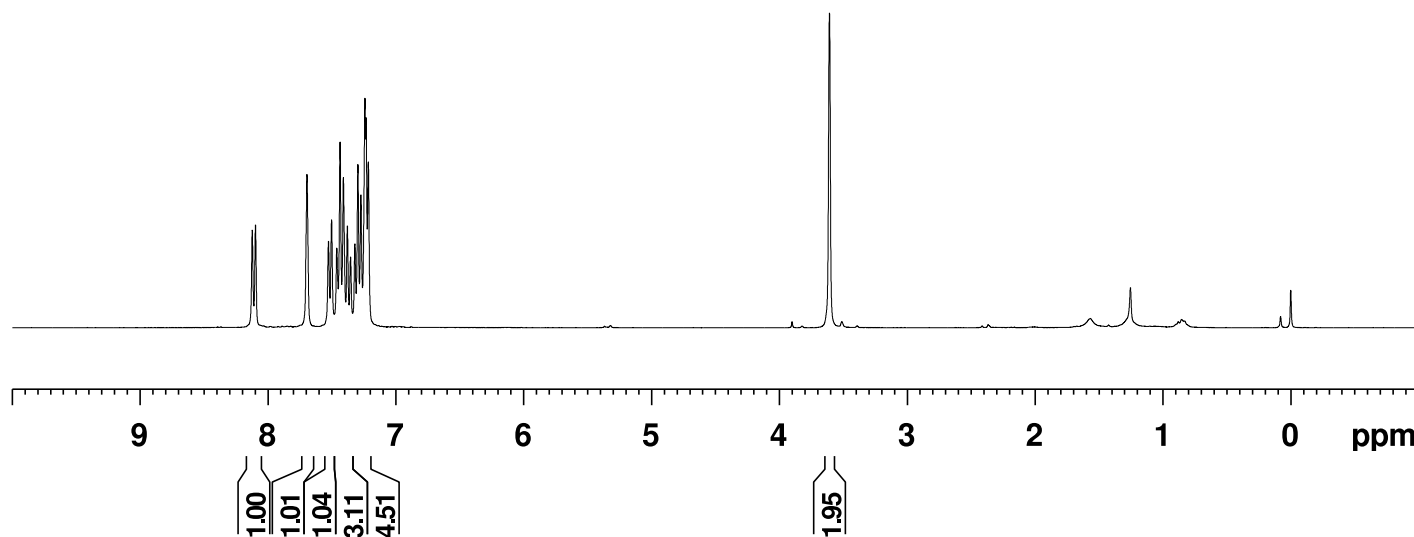

Current Data Parameters  
NAME HNMR-YX-3-p83  
EXPNO 70  
PROCNO 1

F2 - Acquisition Parameters  
Date\_ 20230403  
Time 13.33  
INSTRUM spect  
PROBHD 5 mm PABBO BB-  
PULPROG zg30  
TD 65536  
SOLVENT CDCl3  
NS 16  
DS 2  
SWH 6009.615 Hz  
FIDRES 0.091699 Hz  
AQ 5.4525952 sec  
RG 161  
DW 83.200 usec  
DE 6.50 usec  
TE 291.2 K  
D1 1.00000000 sec  
TD0 1

===== CHANNEL f1 =====  
SFO1 300.1318534 MHz  
NUC1 1H  
P1 10.00 usec  
PLW1 14.00000000 W

F2 - Processing parameters  
SI 65536  
SF 300.1300155 MHz  
WDW EM  
SSB 0  
LB 0.30 Hz  
GB 0  
PC 1.00

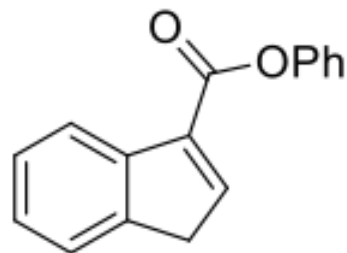

**3z**

162.35  
150.60  
146.34  
143.30  
140.50  
135.68  
129.56  
126.87  
125.96  
125.87  
123.91  
122.53  
121.83

38.76



Current Data Parameters  
NAME CNMR-YX-3-p83  
EXPNO 2  
PROCNO 1

F2 - Acquisition Parameters  
Date\_ 20230329  
Time 4.24 h  
INSTRUM Avance  
PROBHD Z116098\_0833 (  
PULPROG zgpg30  
TD 65536  
SOLVENT CDCl3  
NS 400  
DS 4  
SWH 23809.523 Hz  
FIDRES 0.726609 Hz  
AQ 1.3762560 sec  
RG 46.0295  
DW 21.000 usec  
DE 6.50 usec  
TE 293.5 K  
D1 2.00000000 sec  
D11 0.03000000 sec  
TD0 1  
SFO1 100.6228298 MHz  
NUC1 13C  
P0 3.33 usec  
P1 10.00 usec  
PLW1 87.89900208 W  
SFO2 400.1316005 MHz  
NUC2 1H  
CPDPRG[2] waltz65  
PCPD2 90.00 usec  
PLW2 20.73200035 W  
PLW12 0.25595000 W  
PLW13 0.12874000 W

F2 - Processing parameters  
SI 32768  
SF 100.6127685 MHz  
WDW EM  
SSB 0  
LB 1.00 Hz  
GB 0  
PC 1.40

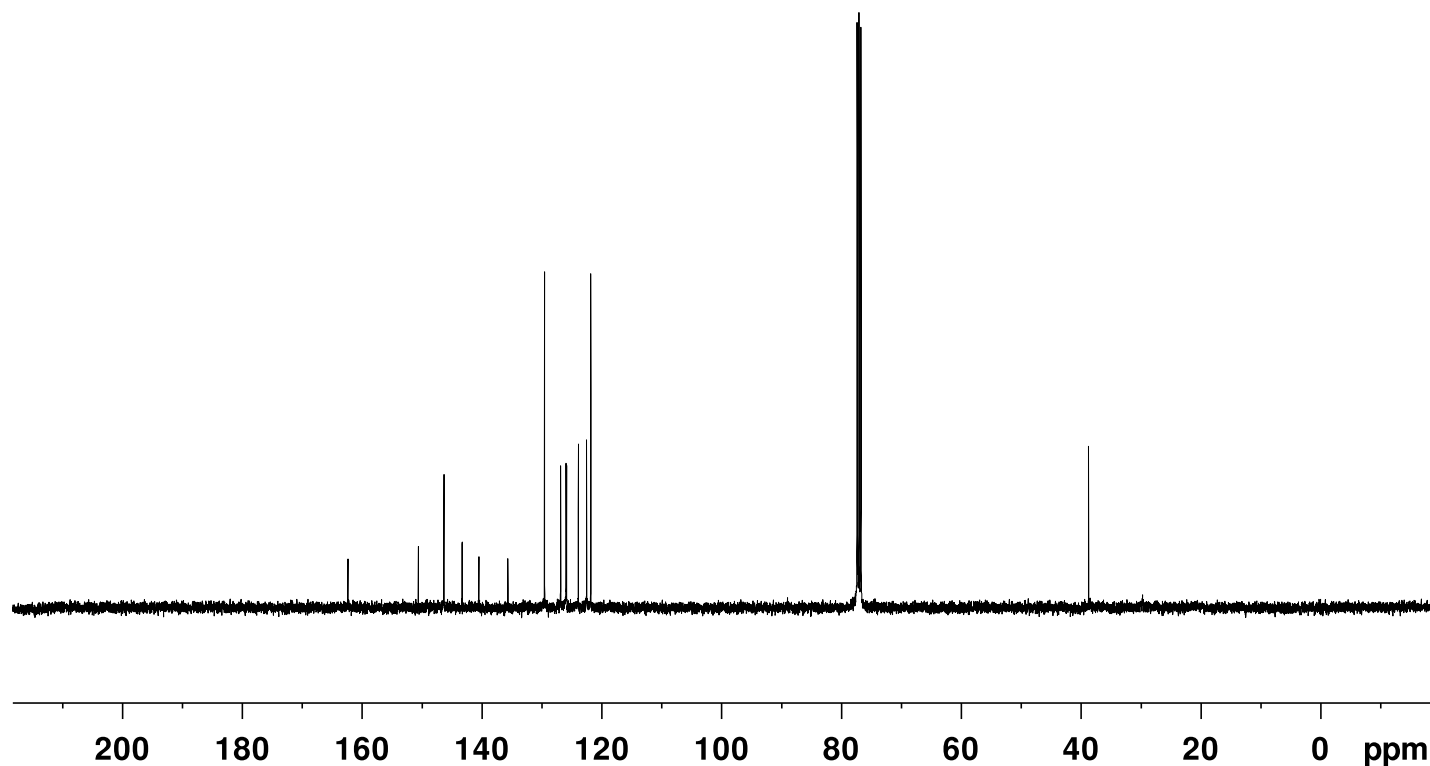



Current Data Parameters  
 NAME HNMR-YX-3-p32  
 EXPNO 1  
 PROCNO 1

F2 - Acquisition Parameters  
 Date\_ 20230207  
 Time 18.20 h  
 INSTRUM Avance  
 PROBHD Z116098\_0833 (  
 PULPROG zg30  
 TD 65536  
 SOLVENT CDCl3  
 NS 16  
 DS 2  
 SWH 8196.722 Hz  
 FIDRES 0.250144 Hz  
 AQ 3.9976959 sec  
 RG 86.8056  
 DW 61.000 usec  
 DE 13.54 usec  
 TE 294.3 K  
 D1 1.00000000 sec  
 TD0 1  
 SFO1 400.1324708 MHz  
 NUC1 1H  
 P0 3.33 usec  
 P1 10.00 usec  
 PLW1 20.73200035 W

F2 - Processing parameters  
 SI 65536  
 SF 400.1300149 MHz  
 WDW EM  
 SSB 0  
 LB 0.30 Hz  
 GB 0  
 PC 1.00

7.391  
7.374  
7.371  
7.247  
7.232  
7.223  
7.219  
7.205  
7.202  
7.193  
7.188  
7.175  
7.171  
4.218  
4.209  
4.200  
4.191  
4.182  
4.173  
4.164  
4.155  
4.054  
4.036  
4.017  
3.099  
3.083  
3.075  
2.931  
2.911  
2.471  
2.455  
2.449  
2.439  
2.433  
2.417  
2.346  
2.332  
2.314  
1.303  
1.285  
1.267

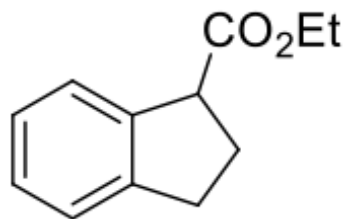

**4a**

racemic

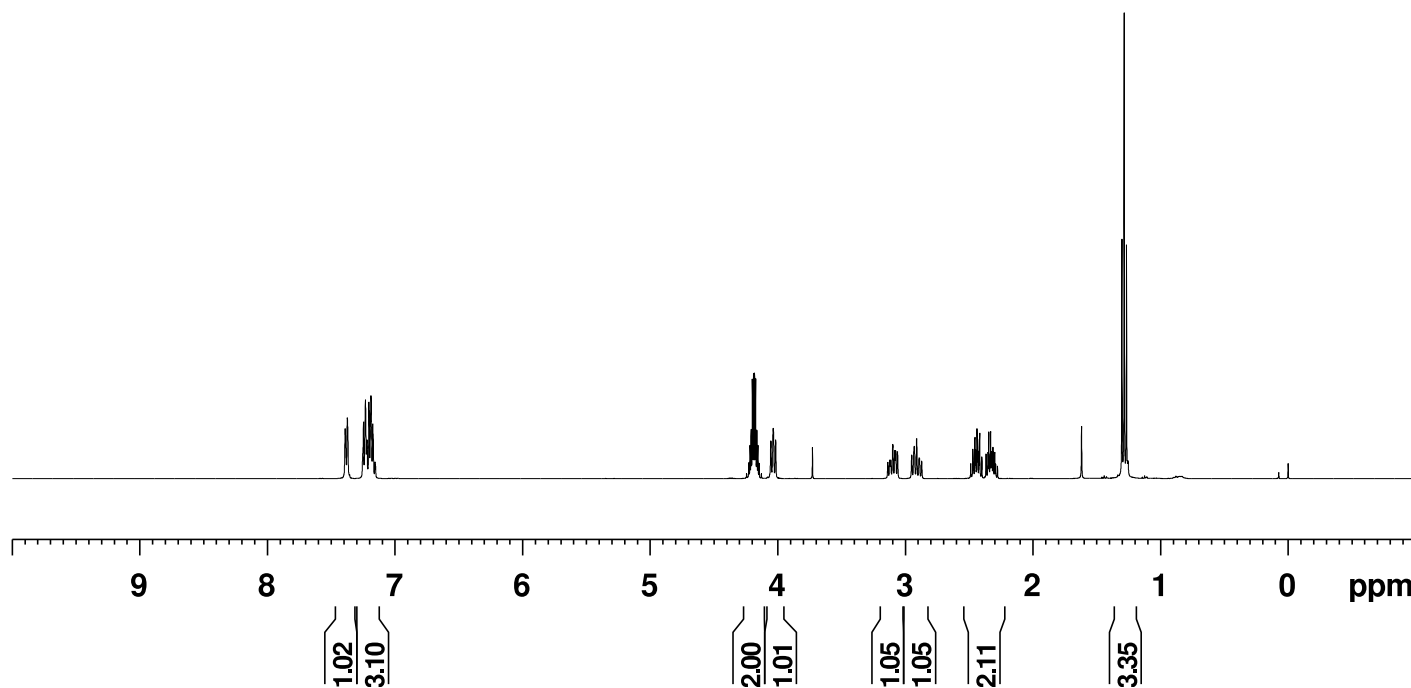

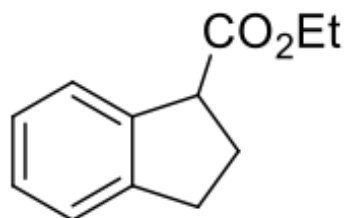

**4a**

racemic

173.94

144.15  
140.87

127.49  
126.41  
124.75  
124.69

60.77

50.23

31.78  
28.66

14.31



Current Data Parameters  
NAME CNMR-YX-3-p32  
EXPNO 2  
PROCNO 1

F2 - Acquisition Parameters  
Date\_ 20230208  
Time 3.25 h  
INSTRUM Avance  
PROBHD Z116098\_0833 (  
PULPROG zgpg30  
TD 65536  
SOLVENT CDCl3  
NS 400  
DS 4  
SWH 23809.523 Hz  
FIDRES 0.726609 Hz  
AQ 1.3762560 sec  
RG 48.6724  
DW 21.000 usec  
DE 6.50 usec  
TE 296.3 K  
D1 2.00000000 sec  
D11 0.03000000 sec  
TD0 1  
SFO1 100.6228298 MHz  
NUC1 13C  
P0 3.33 usec  
P1 10.00 usec  
PLW1 87.89900208 W  
SFO2 400.1316005 MHz  
NUC2 1H  
CPDPRG[2] waltz65  
PCPD2 90.00 usec  
PLW2 20.73200035 W  
PLW12 0.25595000 W  
PLW13 0.12874000 W

F2 - Processing parameters  
SI 32768  
SF 100.6127685 MHz  
WDW EM  
SSB 0  
LB 1.00 Hz  
GB 0  
PC 1.40

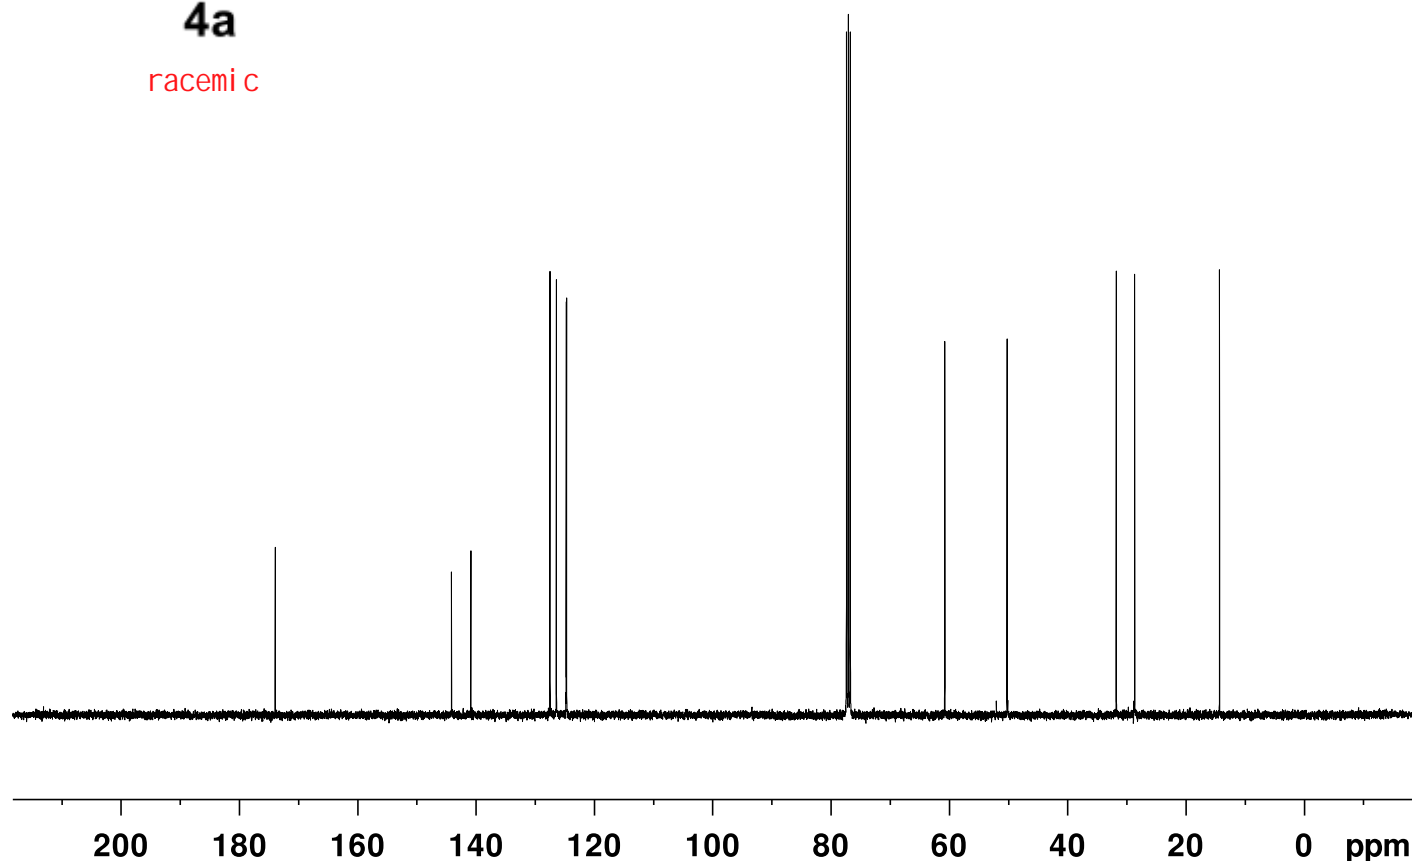

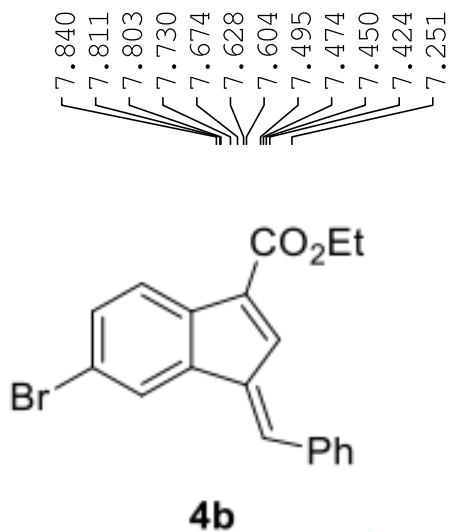

Chemical shift values (ppm) for the aliphatic region:

4.416, 4.392, 4.368, 4.344

Chemical shift values (ppm) for the aliphatic region:

1.434, 1.410, 1.387



Current Data Parameters  
 NAME HNMR-YX-3-p93  
 EXPNO 71  
 PROCNO 1

F2 - Acquisition Parameters  
 Date\_ 20230403  
 Time 13.39  
 INSTRUM spect  
 PROBHD 5 mm PABBO BB-  
 PULPROG zg30  
 TD 65536  
 SOLVENT CDCl3  
 NS 16  
 DS 2  
 SWH 6009.615 Hz  
 FIDRES 0.091699 Hz  
 AQ 5.4525952 sec  
 RG 161  
 DW 83.200 usec  
 DE 6.50 usec  
 TE 291.3 K  
 D1 1.00000000 sec  
 TD0 1

===== CHANNEL f1 =====  
 SFO1 300.1318534 MHz  
 NUC1 1H  
 P1 10.00 usec  
 PLW1 14.00000000 W

F2 - Processing parameters  
 SI 65536  
 SF 300.130093 MHz  
 WDW EM  
 SSB 0  
 LB 0.30 Hz  
 GB 0  
 PC 1.00

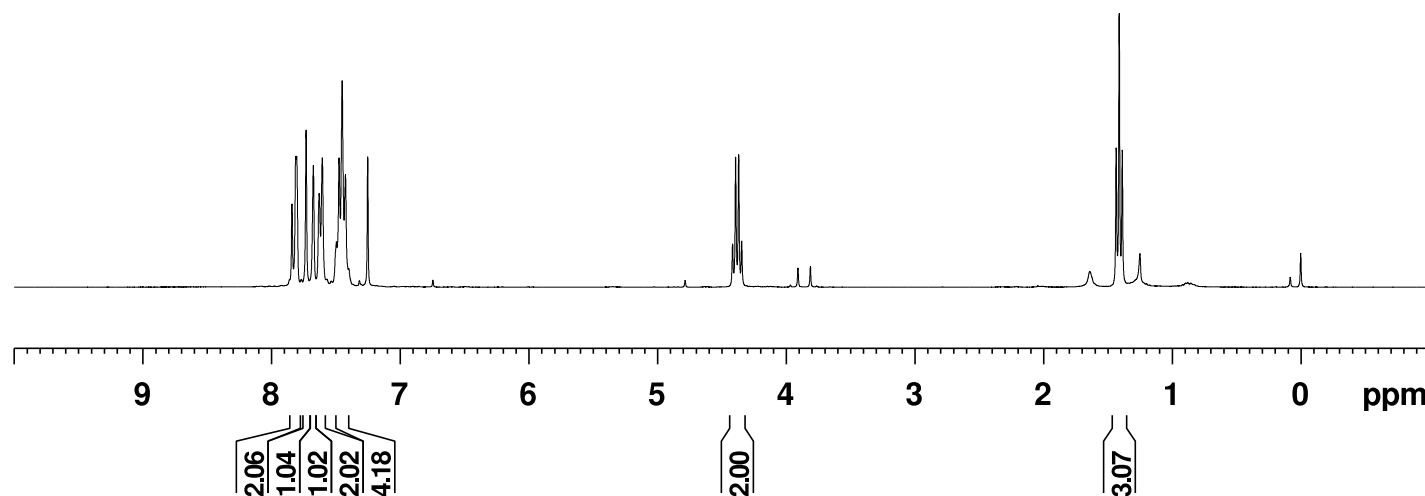

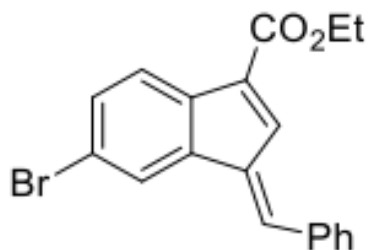

**4b**

164.45  
139.29  
137.22  
136.94  
135.85  
135.80  
135.60  
133.60  
130.75  
130.60  
129.88  
129.08  
123.68  
122.55  
120.06

60.80

14.43



Current Data Parameters  
NAME CNMR-YX-3-p93  
EXPNO 72  
PROCNO 1

F2 - Acquisition Parameters  
Date\_ 20230403  
Time 13.48  
INSTRUM spect  
PROBHD 5 mm PABBO BB-  
PULPROG zgpg30  
TD 65536  
SOLVENT CDCl3  
NS 120  
DS 4  
SWH 18028.846 Hz  
FIDRES 0.275098 Hz  
AQ 1.8175317 sec  
RG 203  
DW 27.733 usec  
DE 6.50 usec  
TE 291.7 K  
D1 2.00000000 sec  
D11 0.03000000 sec  
TD0 1

===== CHANNEL f1 =====  
SFO1 75.4752949 MHz  
NUC1 13C  
P1 9.50 usec  
PLW1 34.20000076 W

===== CHANNEL f2 =====  
SFO2 300.1312005 MHz  
NUC2 1H  
CPDPRG[2] waltz16  
PCPD2 90.00 usec  
PLW2 14.00000000 W  
PLW12 0.17284000 W  
PLW13 0.14000000 W

F2 - Processing parameters  
SI 32768  
SF 75.4677485 MHz  
WDW EM  
SSB 0  
LB 1.00 Hz  
GB 0  
PC 1.40

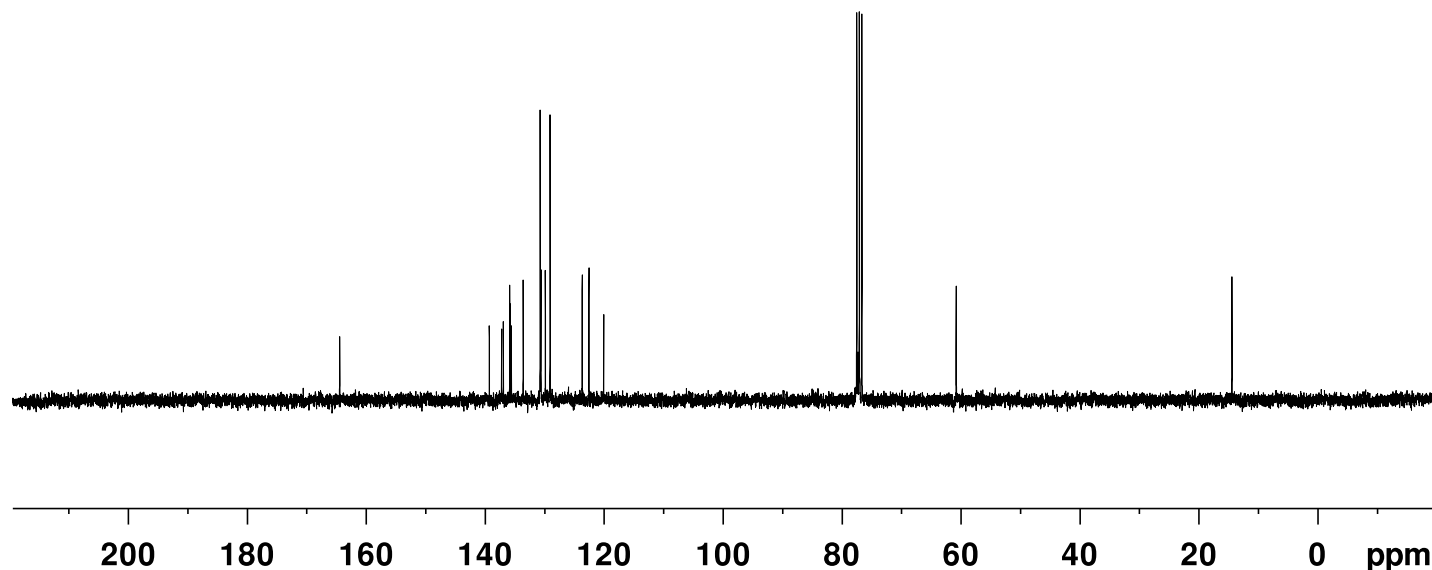

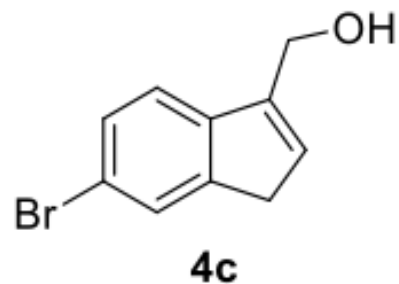

7.575  
7.418  
7.414  
7.398  
7.394  
7.272  
7.252  
6.421

4.657  
4.653

3.334  
3.331

1.930

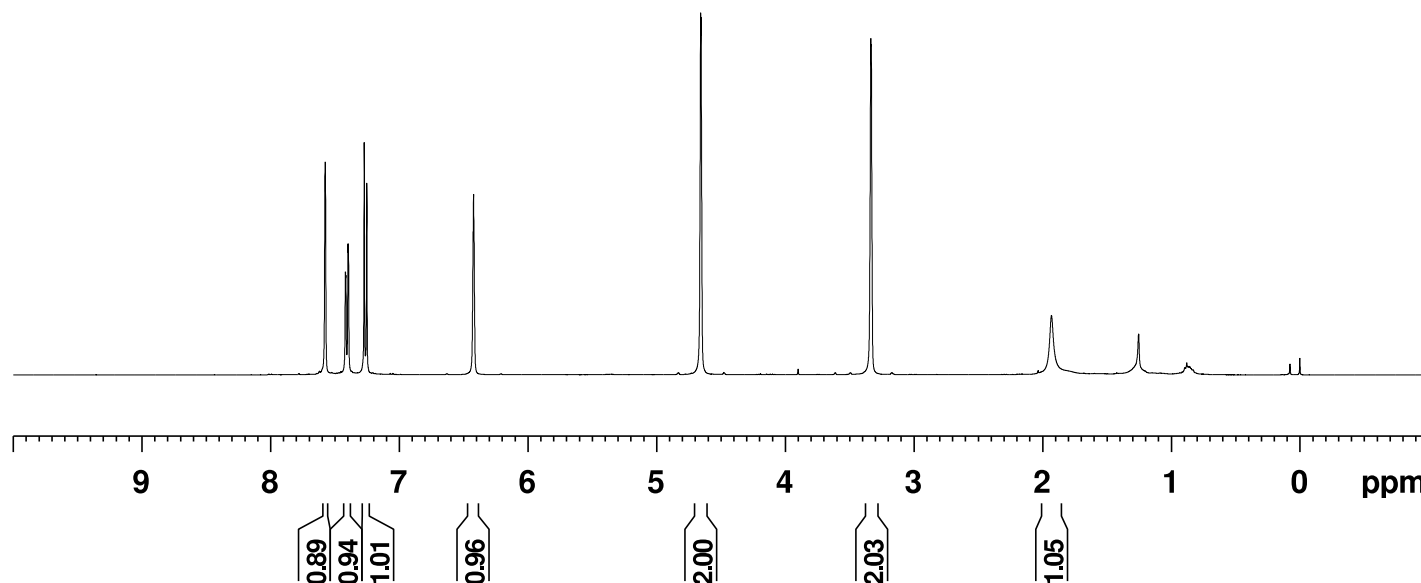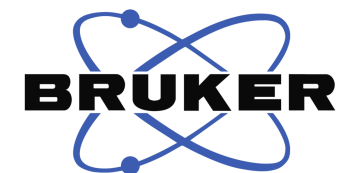

Current Data Parameters  
NAME HNMR-YX-3-p34  
EXPNO 1  
PROCNO 1

F2 - Acquisition Parameters  
Date\_ 20230207  
Time 18.40 h  
INSTRUM Avance  
PROBHD Z116098\_0833 (  
PULPROG zg30  
TD 65536  
SOLVENT CDCl3  
NS 16  
DS 2  
SWH 8196.722 Hz  
FIDRES 0.250144 Hz  
AQ 3.9976959 sec  
RG 88.0902  
DW 61.000 usec  
DE 13.54 usec  
TE 294.3 K  
D1 1.00000000 sec  
TD0 1  
SFO1 400.1324708 MHz  
NUC1 1H  
P0 3.33 usec  
P1 10.00 usec  
PLW1 20.73200035 W

F2 - Processing parameters  
SI 65536  
SF 400.1300123 MHz  
WDW EM  
SSB 0  
LB 0.30 Hz  
GB 0  
PC 1.00

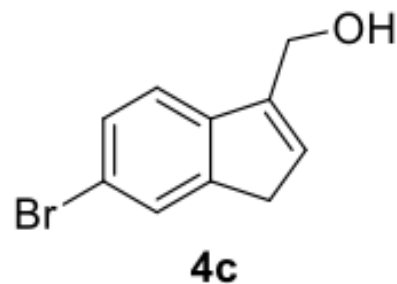

146.55  
143.45  
142.32  
129.94  
129.25  
127.20  
120.70  
119.20

59.62

37.74



Current Data Parameters  
NAME CNMR-YX-3-p34  
EXPNO 2  
PROCNO 1

F2 - Acquisition Parameters  
Date\_ 20230208  
Time 0.36 h  
INSTRUM Avance  
PROBHD Z116098\_0833 (  
PULPROG zgpg30  
TD 65536  
SOLVENT CDCl3  
NS 400  
DS 4  
SWH 23809.523 Hz  
FIDRES 0.726609 Hz  
AQ 1.3762560 sec  
RG 50.1934  
DW 21.000 usec  
DE 6.50 usec  
TE 296.1 K  
D1 2.00000000 sec  
D11 0.03000000 sec  
TD0 1  
SFO1 100.6228298 MHz  
NUC1 13C  
P0 3.33 usec  
P1 10.00 usec  
PLW1 87.89900208 W  
SFO2 400.1316005 MHz  
NUC2 1H  
CPDPRG[2] waltz65  
PCPD2 90.00 usec  
PLW2 20.73200035 W  
PLW12 0.25595000 W  
PLW13 0.12874000 W

F2 - Processing parameters  
SI 32768  
SF 100.6127685 MHz  
WDW EM  
SSB 0  
LB 1.00 Hz  
GB 0  
PC 1.40

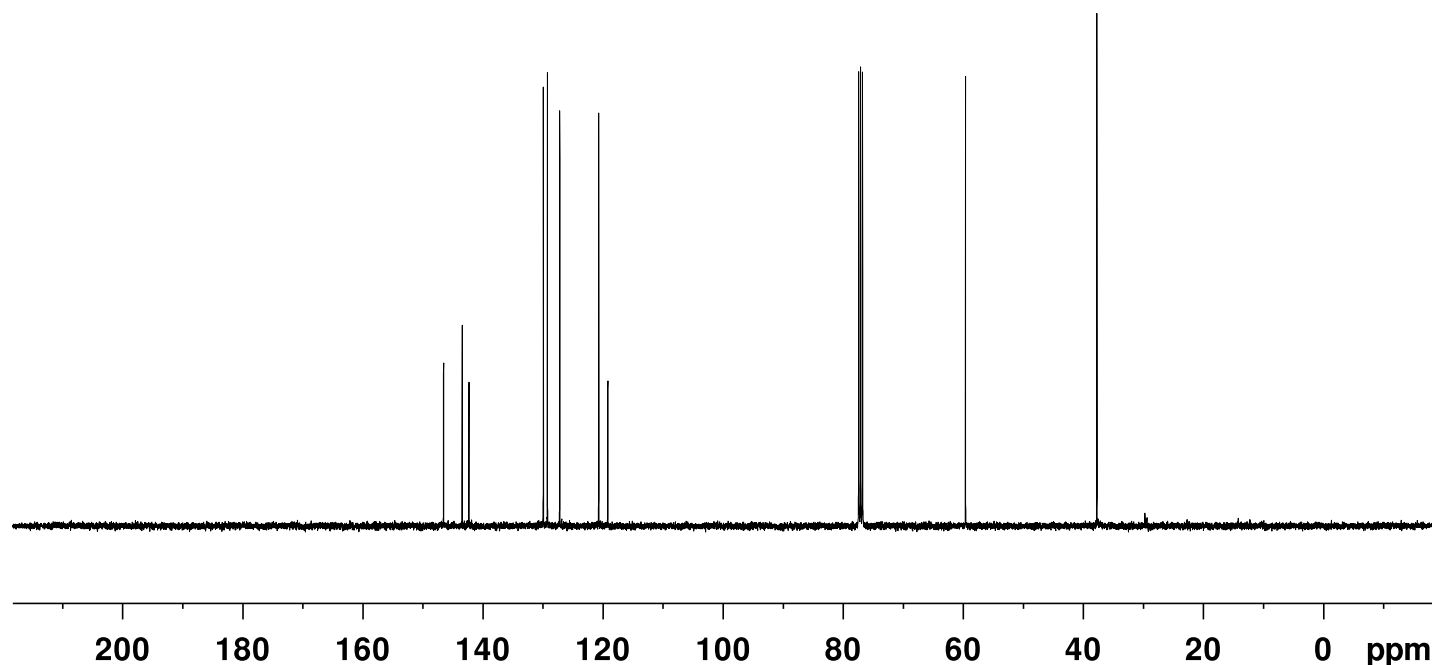

S80



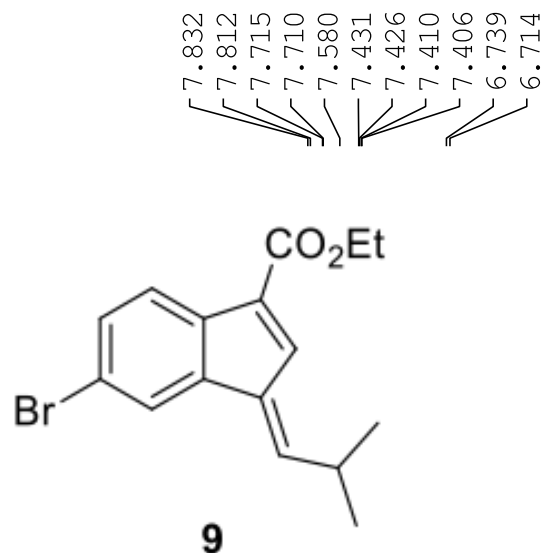

E : Z = 5 : 1

7.832  
7.812  
7.715  
7.710  
7.580  
7.431  
7.426  
7.410  
7.406  
6.739  
6.714

4.404  
4.386  
4.368  
4.362  
4.351  
3.164  
3.155  
3.148  
3.139  
3.131  
3.122  
3.115  
3.106  
1.433  
1.415  
1.397  
1.201  
1.184

3.164  
3.155  
3.148  
3.139  
3.131  
3.122  
3.115  
3.106

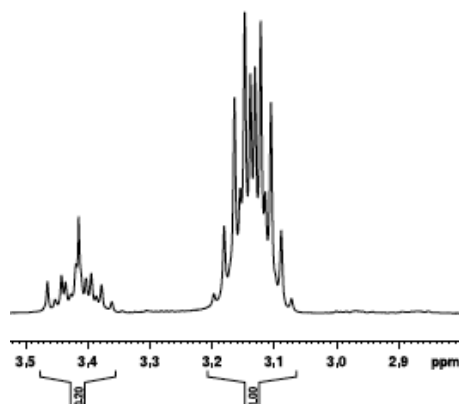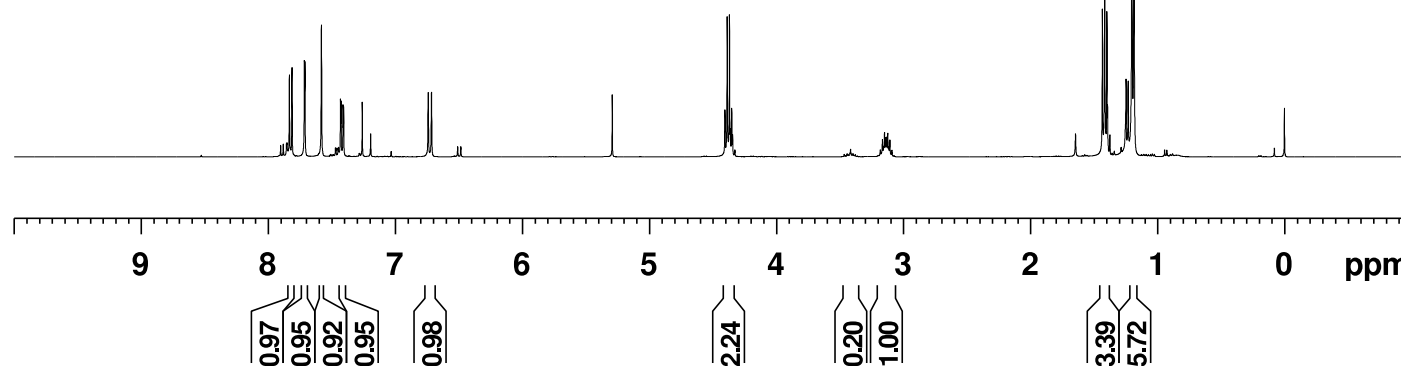

Current Data Parameters  
NAME HNMR-YX-3-p43  
EXPNO 1  
PROCNO 1

F2 - Acquisition Parameters  
Date\_ 20230213  
Time 19.33 h  
INSTRUM Avance  
PROBHD Z116098\_0833 (  
PULPROG zg30  
TD 65536  
SOLVENT CDCl3  
NS 16  
DS 2  
SWH 8196.722 Hz  
FIDRES 0.250144 Hz  
AQ 3.9976959 sec  
RG 62.5  
DW 61.000 usec  
DE 13.54 usec  
TE 293.9 K  
D1 1.00000000 sec  
TD0 1  
SFO1 400.1324708 MHz  
NUC1 1H  
P0 3.33 usec  
P1 10.00 usec  
PLW1 20.73200035 W

F2 - Processing parameters  
SI 65536  
SF 400.1300102 MHz  
WDW EM  
SSB 0  
LB 0.30 Hz  
GB 0  
PC 1.00

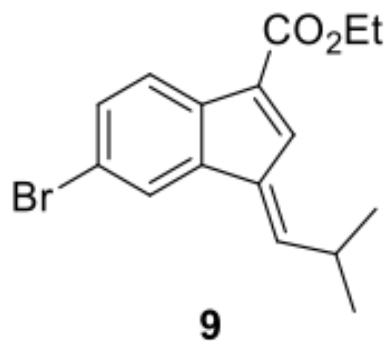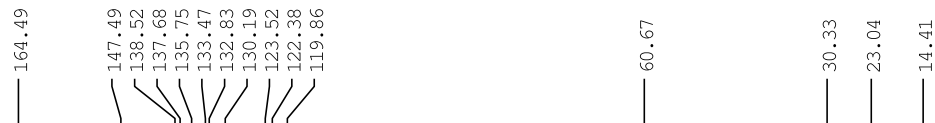

Current Data Parameters  
 NAME CNMR-YX-3-p43  
 EXPNO 1  
 PROCNO 1

F2 - Acquisition Parameters  
 Date\_ 20230214  
 Time 19.26 h  
 INSTRUM Avance  
 PROBHD Z116098\_0833 (  
 PULPROG zgpg30  
 TD 65536  
 SOLVENT CDC13  
 NS 100  
 DS 4  
 SWH 23809.523 Hz  
 FIDRES 0.726609 Hz  
 AQ 1.3762560 sec  
 RG 53.2129  
 DW 21.000 usec  
 DE 6.50 usec  
 TE 294.5 K  
 D1 2.00000000 sec  
 D11 0.03000000 sec  
 TD0 1  
 SFO1 100.6228298 MHz  
 NUC1 13C  
 P0 3.33 usec  
 P1 10.00 usec  
 PLW1 87.89900208 W  
 SFO2 400.1316005 MHz  
 NUC2 1H  
 CPDPRG[2] waltz65  
 PCPD2 90.00 usec  
 PLW2 20.73200035 W  
 PLW12 0.25595000 W  
 PLW13 0.12874000 W

F2 - Processing parameters  
 SI 32768  
 SF 100.6127685 MHz  
 WDW EM  
 SSB 0  
 LB 1.00 Hz  
 GB 0  
 PC 1.40

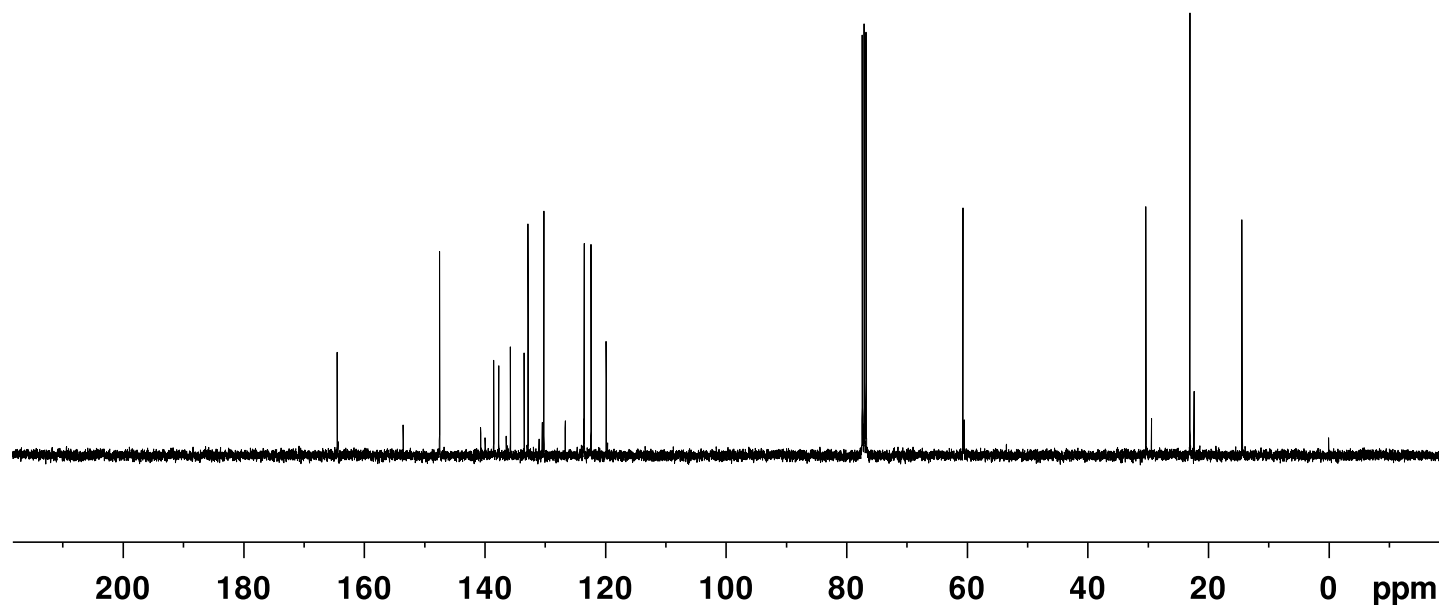



Current Data Parameters  
 NAME HNMR-YX-3-p53  
 EXPNO 1  
 PROCNO 1

F2 - Acquisition Parameters  
 Date\_ 20230221  
 Time 20.36 h  
 INSTRUM Avance  
 PROBHD Z116098\_0833 (  
 PULPROG zg30  
 TD 65536  
 SOLVENT CDCl3  
 NS 16  
 DS 2  
 SWH 8196.722 Hz  
 FIDRES 0.250144 Hz  
 AQ 3.9976959 sec  
 RG 70.8617  
 DW 61.000 usec  
 DE 13.54 usec  
 TE 294.6 K  
 D1 1.00000000 sec  
 TD0 1  
 SFO1 400.1324708 MHz  
 NUC1 1H  
 P0 3.33 usec  
 P1 10.00 usec  
 PLW1 20.73200035 W

F2 - Processing parameters  
 SI 65536  
 SF 400.1300136 MHz  
 WDW EM  
 SSB 0  
 LB 0.30 Hz  
 GB 0  
 PC 1.00

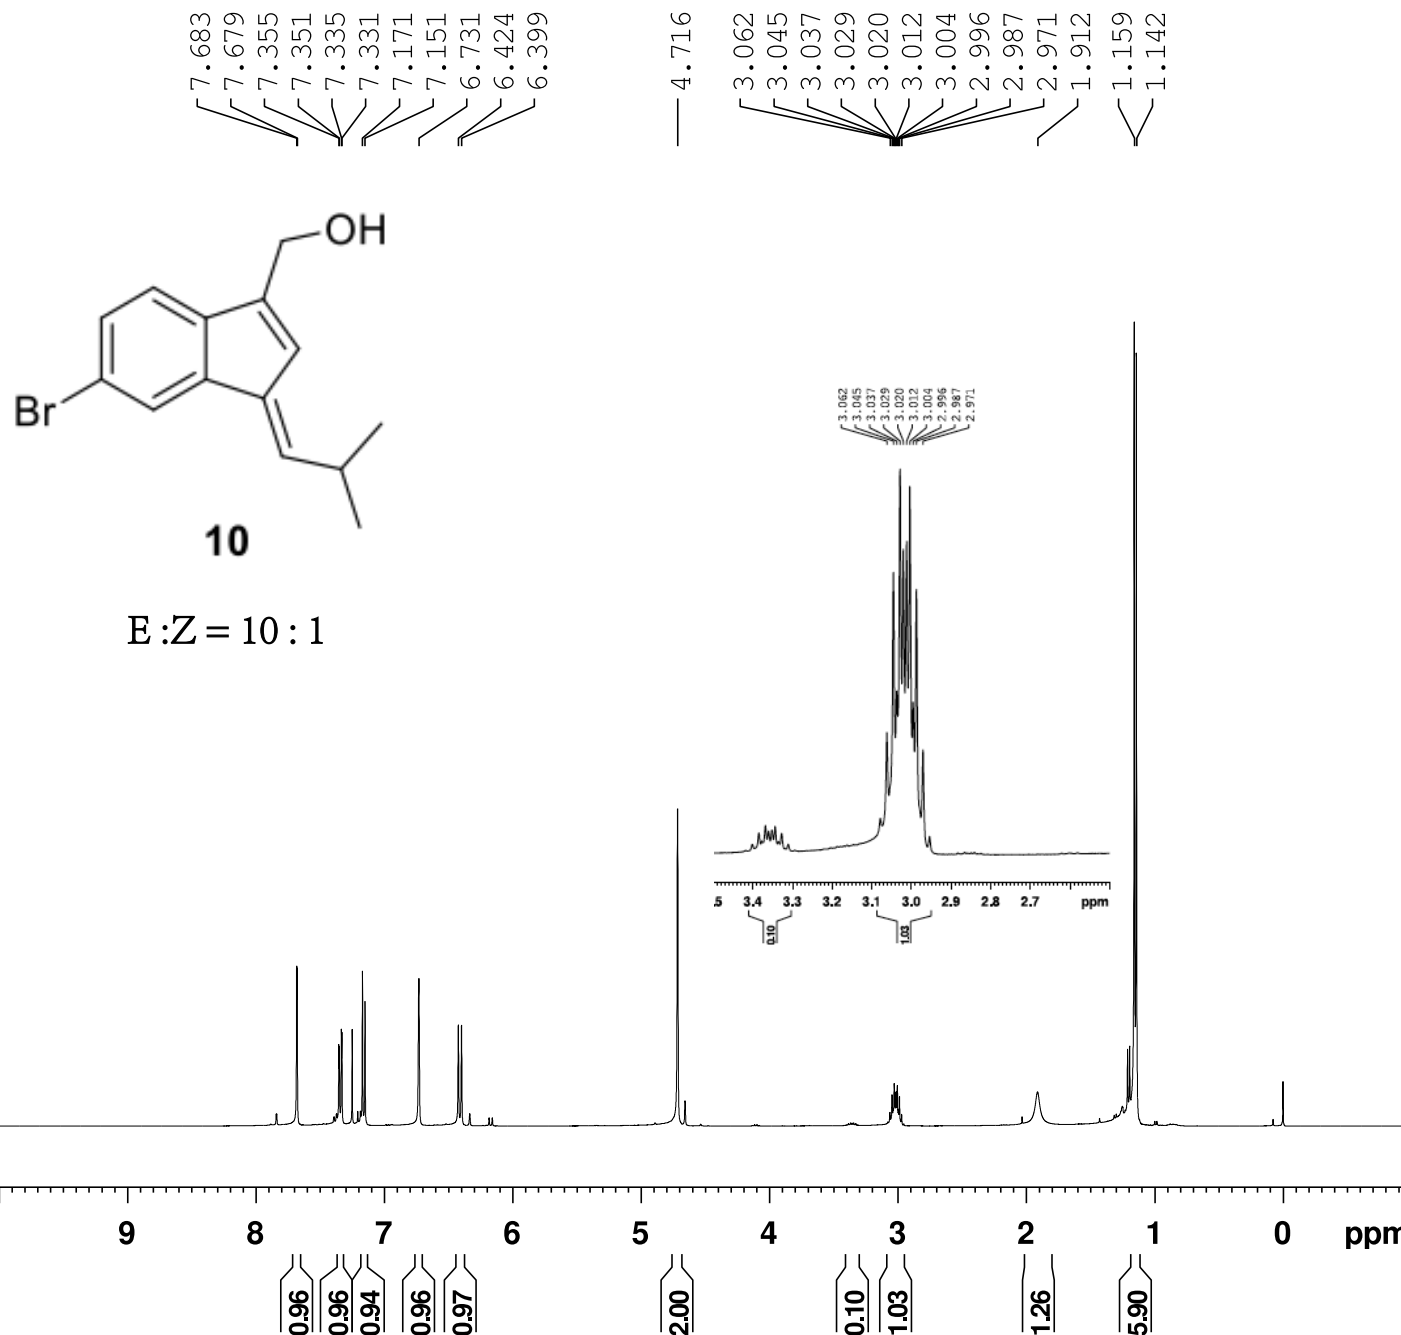



Current Data Parameters  
 NAME CNMR-YX-3-p53  
 EXPNO 2  
 PROCNO 1

F2 - Acquisition Parameters  
 Date\_ 20230222  
 Time 4.20 h  
 INSTRUM Avance  
 PROBHD Z116098\_0833 (  
 PULPROG zgpg30  
 TD 65536  
 SOLVENT CDCl3  
 NS 100  
 DS 4  
 SWH 23809.523 Hz  
 FIDRES 0.726609 Hz  
 AQ 1.3762560 sec  
 RG 50.1934  
 DW 21.000 usec  
 DE 6.50 usec  
 TE 295.8 K  
 D1 2.00000000 sec  
 D11 0.03000000 sec  
 TD0 1  
 SFO1 100.6228298 MHz  
 NUC1 13C  
 P0 3.33 usec  
 P1 10.00 usec  
 PLW1 87.89900208 W  
 SFO2 400.1316005 MHz  
 NUC2 1H  
 CPDPRG[2] waltz65  
 PCPD2 90.00 usec  
 PLW2 20.73200035 W  
 PLW12 0.25595000 W  
 PLW13 0.12874000 W

F2 - Processing parameters  
 SI 32768  
 SF 100.6127685 MHz  
 WDW EM  
 SSB 0  
 LB 1.00 Hz  
 GB 0  
 PC 1.40

146.71  
 143.69  
 140.60  
 139.59  
 136.17  
 129.55  
 122.47  
 121.55  
 120.35  
 119.45

59.68

29.78

23.19

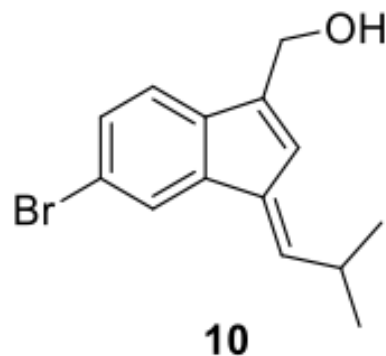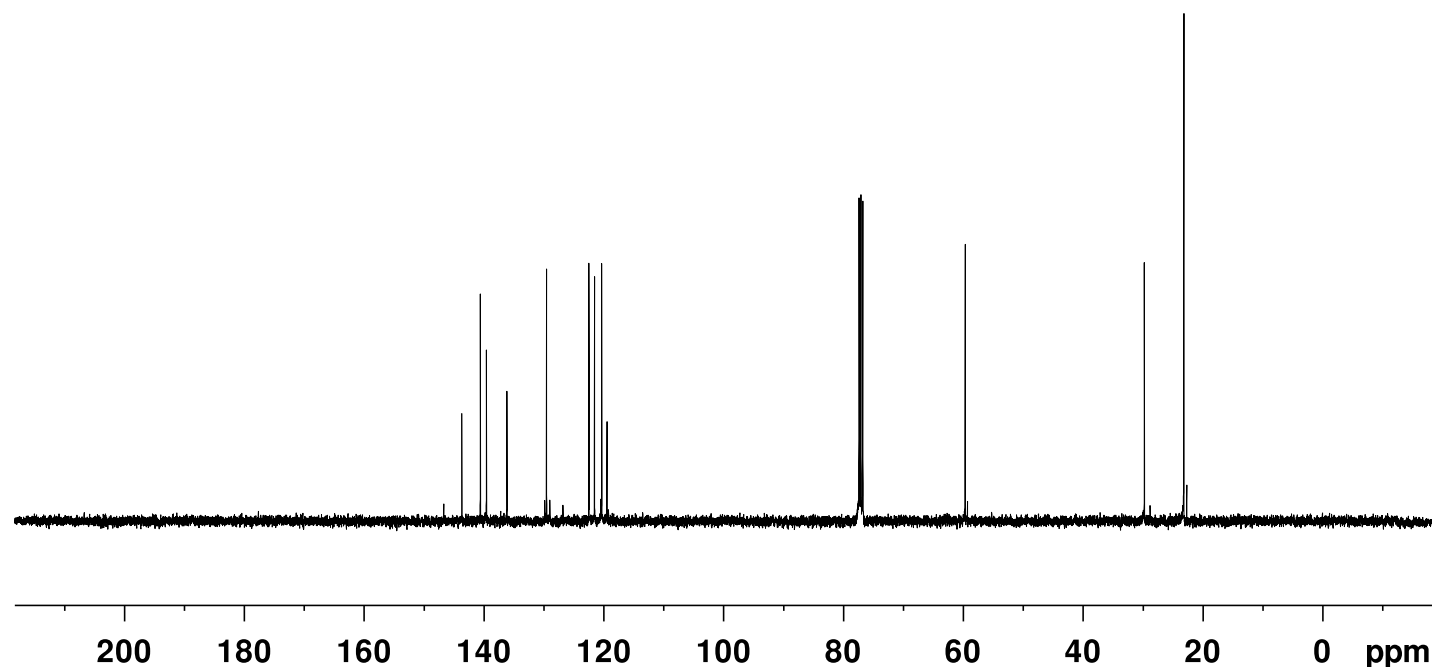

Supplement: d3cc01093g1.pdf [file d3cc01093g1.pdf]
